# Supplementary material for: Characterization of Global Transcriptome Using Illumina Paired-End Sequencing and Development of EST-SSR Markers in Two Species of Gynostemma (Cucurbitaceae)
Source: Molecules. 2015 Nov 30;20(12):21214–31. doi: 10.3390/molecules201219758 (PMC6332360; doi:10.3390/molecules201219758)
Supplement: Supplementary file 1 [file molecules-20-19758-s001.xlsx]

## Sheet: Sheet1
Table S1. KEGG categories of nonredundant consensus sequences in Gynostemma.
#	Pathway	Count (11059)	Pathway ID
1	Glycolysis / Gluconeogenesis	266	ko00010
2	Citrate cycle (TCA cycle)	141	ko00020
3	Pentose phosphate pathway	120	ko00030
4	Pentose and glucuronate interconversions	91	ko00040
5	Fructose and mannose metabolism	95	ko00051
6	Galactose metabolism	73	ko00052
7	Ascorbate and aldarate metabolism	83	ko00053
8	Fatty acid biosynthesis	55	ko00061
9	Fatty acid elongation in mitochondria	7	ko00062
10	Fatty acid metabolism	104	ko00071
11	Synthesis and degradation of ketone bodies	12	ko00072
12	Steroid biosynthesis	50	ko00100
13	Ubiquinone and other terpenoid-quinone biosynthesis	56	ko00130
14	Oxidative phosphorylation	339	ko00190
15	Photosynthesis	202	ko00195
16	Photosynthesis - antenna proteins	77	ko00196
17	Purine metabolism	227	ko00230
18	Caffeine metabolism	4	ko00232
19	Pyrimidine metabolism	180	ko00240
20	Alanine, aspartate and glutamate metabolism	128	ko00250
21	Glycine, serine and threonine metabolism	116	ko00260
22	Cysteine and methionine metabolism	191	ko00270
23	Valine, leucine and isoleucine degradation	113	ko00280
24	Valine, leucine and isoleucine biosynthesis	70	ko00290
25	Lysine biosynthesis	31	ko00300
26	Lysine degradation	42	ko00310
27	Arginine and proline metabolism	156	ko00330
28	Histidine metabolism	46	ko00340
29	Tyrosine metabolism	58	ko00350
30	Phenylalanine metabolism	141	ko00360
31	Tryptophan metabolism	78	ko00380
32	Phenylalanine, tyrosine and tryptophan biosynthesis	75	ko00400
33	beta-Alanine metabolism	79	ko00410
34	Taurine and hypotaurine metabolism	23	ko00430
35	Selenocompound metabolism	39	ko00450
36	Cyanoamino acid metabolism	54	ko00460
37	Glutathione metabolism	131	ko00480
38	Starch and sucrose metabolism	202	ko00500
39	N-Glycan biosynthesis	69	ko00510
40	Other glycan degradation	16	ko00511
41	Other types of O-glycan biosynthesis	5	ko00514
42	Amino sugar and nucleotide sugar metabolism	184	ko00520
43	Glycosaminoglycan degradation	15	ko00531
44	Glycerolipid metabolism	83	ko00561
45	Inositol phosphate metabolism	85	ko00562
46	Glycosylphosphatidylinositol(GPI)-anchor biosynthesis	21	ko00563
47	Glycerophospholipid metabolism	97	ko00564
48	Ether lipid metabolism	29	ko00565
49	Arachidonic acid metabolism	25	ko00590
50	Linoleic acid metabolism	2	ko00591
51	alpha-Linolenic acid metabolism	25	ko00592
52	Sphingolipid metabolism	32	ko00600
53	Glycosphingolipid biosynthesis - globo series	13	ko00603
54	Glycosphingolipid biosynthesis - ganglio series	6	ko00604
55	Pyruvate metabolism	192	ko00620
56	Glyoxylate and dicarboxylate metabolism	120	ko00630
57	Propanoate metabolism	85	ko00640
58	Butanoate metabolism	47	ko00650
59	C5-Branched dibasic acid metabolism	9	ko00660
60	One carbon pool by folate	35	ko00670
61	Carbon fixation in photosynthetic organisms	224	ko00710
62	Thiamine metabolism	13	ko00730
63	Riboflavin metabolism	14	ko00740
64	Vitamin B6 metabolism	24	ko00750
65	Nicotinate and nicotinamide metabolism	18	ko00760
66	Pantothenate and CoA biosynthesis	53	ko00770
67	Biotin metabolism	7	ko00780
68	Lipoic acid metabolism	6	ko00785
69	Folate biosynthesis	23	ko00790
70	Porphyrin and chlorophyll metabolism	75	ko00860
71	Terpenoid backbone biosynthesis	106	ko00900
72	Limonene and pinene degradation	30	ko00903
73	Diterpenoid biosynthesis	19	ko00904
74	Brassinosteroid biosynthesis	4	ko00905
75	Carotenoid biosynthesis	52	ko00906
76	Zeatin biosynthesis	32	ko00908
77	Nitrogen metabolism	132	ko00910
78	Sulfur metabolism	62	ko00920
79	Phenylpropanoid biosynthesis	183	ko00940
80	Flavonoid biosynthesis	42	ko00941
81	Flavone and flavonol biosynthesis	7	ko00944
82	Stilbenoid, diarylheptanoid and gingerol biosynthesis	22	ko00945
83	Isoquinoline alkaloid biosynthesis	15	ko00950
84	Tropane, piperidine and pyridine alkaloid biosynthesis	17	ko00960
85	Aminoacyl-tRNA biosynthesis	85	ko00970
86	Biosynthesis of unsaturated fatty acids	99	ko01040
87	ABC transporters	14	ko02010
88	Ribosome biogenesis in eukaryotes	166	ko03008
89	Ribosome	914	ko03010
90	RNA transport	324	ko03013
91	mRNA surveillance pathway	173	ko03015
92	RNA degradation	164	ko03018
93	RNA polymerase	63	ko03020
94	Basal transcription factors	60	ko03022
95	DNA replication	67	ko03030
96	Spliceosome	322	ko03040
97	Proteasome	89	ko03050
98	Protein export	89	ko03060
99	Base excision repair	45	ko03410
100	Nucleotide excision repair	81	ko03420
101	Mismatch repair	57	ko03430
102	Homologous recombination	68	ko03440
103	Non-homologous end-joining	13	ko03450
104	Phosphatidylinositol signaling system	71	ko04070
105	Plant hormone signal transduction	374	ko04075
106	Ubiquitin mediated proteolysis	162	ko04120
107	Sulfur relay system	24	ko04122
108	SNARE interactions in vesicular transport	37	ko04130
109	Regulation of autophagy	28	ko04140
110	Protein processing in endoplasmic reticulum	384	ko04141
111	Endocytosis	174	ko04144
112	Phagosome	129	ko04145
113	Peroxisome	179	ko04146
114	Plant-pathogen interaction	209	ko04626
115	Natural killer cell mediated cytotoxicity	25	ko04650
116	Circadian rhythm - mammal	18	ko04710
117	Circadian rhythm - plant	22	ko04712

## Sheet: Sheet2
Table S2: Primer sequences for SSR loci
All-Unigene ID	SSR type	SSR motif	size	start	end	FORWARD PRIMER1 (5'-3')	Tm(°C)	size	REVERSE PRIMER1 (5'-3')	Tm(°C)	size	PRODUCT size (bp)	COG_class	COG_class_annotation	GO_annotation	KEGG_annotation	Swissprot_annotation	nr_annotation
CL119Contig1	p3	(AGA)5	15	301	316	GGAAAGTTTCTCACATTTGC	54.91	20	TGGGGTTTAAGTCTACTAGCAT	54.91	22	118	--	--	Molecular Function: sequence-specific DNA binding transcription factor activity (GO:0003700);; Cellular Component: nucleus (GO:0005634);; Biological Process: determination of bilateral symmetry (GO:0009855);; Biological Process: polarity specification of adaxial/abaxial axis (GO:0009944);; Biological Process: meristem initiation (GO:0010014);; Biological Process: guard cell differentiation (GO:00…	--	Cyclic dof factor 1 OS=Arabidopsis thaliana GN=CDF1 PE=1 SV=2	hypothetical protein PRUPE_ppa005580mg [Prunus persica]
CL144Contig1	p2	(AG)9	18	301	319	GACTTGTAGCCACAGTCAAAC	54.94	21	TTCACTTTCACTCTCTCTTCCT	54.99	22	130	--	--	Molecular Function: intracellular cAMP activated cation channel activity (GO:0005222);; Molecular Function: inward rectifier potassium channel activity (GO:0005242);; Molecular Function: voltage-gated potassium channel activity (GO:0005249);; Molecular Function: calcium channel activity (GO:0005262);; Molecular Function: calmodulin binding (GO:0005516);; Cellular Component: plasma membrane (GO:00…	--	Probable cyclic nucleotide-gated ion channel 6 OS=Arabidopsis thaliana GN=CNGC6 PE=1 SV=2	PREDICTED: probable cyclic nucleotide-gated ion channel 6-like [Cucumis sativus]
CL176Contig1	p3	(CAT)6	18	301	319	CTTCGTCCACCTTTGAGTAG	55.04	20	ATGATAGATAGCCAGCACAAG	54.69	21	157	--	--	Biological Process: cytokinesis (GO:0000910);; Biological Process: cell activation (GO:0001775);; Molecular Function: protein binding (GO:0005515);; Cellular Component: nucleus (GO:0005634);; Cellular Component: cytoskeleton (GO:0005856);; Cellular Component: plasma membrane (GO:0005886);; Biological Process: nucleus organization (GO:0006997);; Biological Process: signal transduction (GO:0007165)…	--	Glycine-rich protein A3 OS=Daucus carota PE=2 SV=1	PREDICTED: uncharacterized protein LOC101217878 [Cucumis sativus]
CL242Contig1	p2	(AG)7	14	56	70	GAGTTTTTGAGAGAGGGAGAG	54.89	21	GGATGGCTTAATCAGTGAAG	54.87	20	136	[KL]	--	Biological Process: negative regulation of transcription from RNA polymerase II promoter (GO:0000122);; Cellular Component: nuclear chromatin (GO:0000790);; Biological Process: chlamydospore formation (GO:0001410);; Biological Process: blastocyst development (GO:0001824);; Biological Process: vasculature development (GO:0001944);; Biological Process: immune system process (GO:0002376);; Molecular…	--	ATP-dependent helicase BRM OS=Arabidopsis thaliana GN=BRM PE=1 SV=1	PREDICTED: ATP-dependent helicase BRM-like [Cucumis sativus]
CL314Contig1	p2	(GA) 8	16	301	317	TAGCCATTGAAGTCAGTGAA	54.37	20	TAACGCTTTATGGCTTTGTC	55.73	20	178
CL326Contig1	p2	(GA)6	12	248	260	AGGGAGAGAGTTCATCAAAAC	55.01	21	TTTGAGGGATTTGTACCTTG	55.23	20	166	--	--	Cellular Component: nucleolus (GO:0005730);; Cellular Component: plasma membrane (GO:0005886);; Biological Process: nucleotide biosynthetic process (GO:0009165);; Biological Process: leaf senescence (GO:0010150);; Biological Process: protein metabolic process (GO:0019538);; Biological Process: macromolecule modification (GO:0043412);; Biological Process: cellular macromolecule metabolic process (…	--	Autophagy-related protein 2 OS=Cryptococcus neoformans var. neoformans serotype D (strain JEC21 / ATCC MYA-565) GN=ATG2 PE=3 SV=1	PREDICTED: uncharacterized protein LOC101223109 [Cucumis sativus]
CL336Contig1	p3	(TGC)5	15	301	316	TGTCTTCTCTGGATACAGATTG	54.53	22	GAGATAAAGACACATCCATCG	54.72	21	151	[KL]	--	Molecular Function: nucleotide binding (GO:0000166);; Molecular Function: nucleic acid binding (GO:0003676);; Molecular Function: DNA binding (GO:0003677);; Molecular Function: chromatin binding (GO:0003682);; Molecular Function: helicase activity (GO:0004386);; Molecular Function: protein binding (GO:0005515);; Molecular Function: ATP binding (GO:0005524);; Cellular Component: nucleus (GO:000563…	--	Putative DNA repair and recombination protein RAD26-like OS=Mus musculus GN=Rad26l PE=2 SV=2	PREDICTED: putative DNA repair and recombination protein RAD26-like [Cucumis sativus]
CL428Contig1	p3	(TCT)6	18	301	319	GAGGATAAGGAAAGTCTCCAA	55.12	21	AGATGTGCCAGATAGGGATT	56.11	20	146	--	--	Biological Process: respiratory burst involved in defense response (GO:0002679);; Molecular Function: DNA binding (GO:0003677);; Molecular Function: sequence-specific DNA binding transcription factor activity (GO:0003700);; Molecular Function: protein binding (GO:0005515);; Cellular Component: nucleolus (GO:0005730);; Biological Process: oligopeptide transport (GO:0006857);; Biological Process: r…	--	Ethylene-responsive transcription factor ABR1 OS=Arabidopsis thaliana GN=ABR1 PE=2 SV=1	PREDICTED: uncharacterized protein LOC101207587 [Cucumis sativus]
CL492Contig1	p3	(AGA)5	15	112	127	AAACCCTAGACACAGAACCAT	55.25	21	AAGGTAAAGACGGCGATATT	55.6	20	158	[J]	Translation, ribosomal structure and biogenesis	Cellular Component: chromosome, centromeric region (GO:0000775);; Biological Process: RNA methylation (GO:0001510);; Biological Process: pseudouridine synthesis (GO:0001522);; Biological Process: nematode larval development (GO:0002119);; Molecular Function: DNA binding (GO:0003677);; Molecular Function: telomerase activity (GO:0003720);; Molecular Function: RNA binding (GO:0003723);; Molecular F…	K11131|0.0|pop:POPTR_865471|hypothetical protein	H/ACA ribonucleoprotein complex subunit 4 OS=Arabidopsis thaliana GN=CBF5 PE=1 SV=1	PREDICTED: H/ACA ribonucleoprotein complex subunit 4-like, partial [Cucumis sativus]
CL558Contig1	p3	(TCC)5	15	301	316	CAACTCGATCAGCTTCTTCT	54.8	20	GTCAACATTCCGATCCTTACT	55.74	21	137	[RTKL]	--	Molecular Function: protein serine/threonine kinase activity (GO:0004674);; Molecular Function: protein serine/threonine/tyrosine kinase activity (GO:0004712);; Molecular Function: protein serine/threonine phosphatase activity (GO:0004722);; Molecular Function: protein binding (GO:0005515);; Cellular Component: nucleus (GO:0005634);; Cellular Component: mitochondrion (GO:0005739);; Cellular Compo…	--	Probable protein phosphatase 2C 38 OS=Arabidopsis thaliana GN=At3g12620 PE=2 SV=1	PREDICTED: serine/threonine-protein kinase CTR1-like [Cucumis sativus]
CL784Contig1	p3	(AAG)6	18	60	78	GTTGATCAAGAGGATGATGAG	54.65	21	CGGTCAGAATTTTGAGAAAC	54.92	20	167	[RTKL]	--	Molecular Function: protein kinase activity (GO:0004672);; Molecular Function: protein serine/threonine kinase activity (GO:0004674);; Cellular Component: nucleus (GO:0005634);; Cellular Component: cytosol (GO:0005829);; Cellular Component: plasma membrane (GO:0005886);; Biological Process: polysaccharide metabolic process (GO:0005976);; Cellular Component: plasmodesma (GO:0009506);; Biological P…	--	Receptor-like cytosolic serine/threonine-protein kinase RBK2 OS=Arabidopsis thaliana GN=RBK2 PE=1 SV=1	PREDICTED: uncharacterized protein LOC101206547 [Cucumis sativus]
CL920Contig1	p3	(TTC)5	15	301	316	ACCTTTGGGTTTAGACTTGAG	55.15	21	CGACGACGAATAATGAAAG	54.34	19	168	--	--	Molecular Function: DNA binding (GO:0003677);; Molecular Function: sequence-specific DNA binding transcription factor activity (GO:0003700);; Cellular Component: nucleus (GO:0005634);; Biological Process: amino acid transport (GO:0006865);; Biological Process: metabolic process (GO:0008152);; Biological Process: response to salt stress (GO:0009651);; Biological Process: response to ethylene stimu…	--	Probable WRKY transcription factor 48 OS=Arabidopsis thaliana GN=WRKY48 PE=2 SV=1	PREDICTED: probable WRKY transcription factor 48-like [Cucumis sativus]
CL1095Contig1	p3	(GAA)5	15	301	316	ATAACAAGGAGAACTCGAAGG	55.23	21	CCCTTTTCTCTTTCTCTTCTCT	55.33	22	185	--	--	--	--	--	PREDICTED: uncharacterized protein LOC101221491 [Cucumis sativus]
CL1143Contig1	p3	(CTC)5	15	301	316	CAGATCCTGGTCTAGTTACCC	55.34	21	CTTCTGCTTATGGAGATGATG	55.06	21	162	--	--	Molecular Function: nucleic acid binding (GO:0003676);; Molecular Function: protein binding (GO:0005515);; Cellular Component: nucleus (GO:0005634);; Cellular Component: cytosol (GO:0005829);; Biological Process: regulation of transcription, DNA-dependent (GO:0006355);; Biological Process: transcription from RNA polymerase II promoter (GO:0006366);; Cellular Component: protein complex (GO:0043234…	--	Uncharacterized protein At5g39570 OS=Arabidopsis thaliana GN=At5g39570 PE=1 SV=1	PREDICTED: uncharacterized protein At5g39570-like [Cucumis sativus]
CL1229Contig1	p2	(GT)7	14	185	199	TAACCGCTGTGTGTCAAAT	55.04	19	GATAGCCAAGTCTCAGGATCT	55.12	21	158	[R]	General function prediction only	Molecular Function: serine-type endopeptidase activity (GO:0004252);; Cellular Component: mitochondrion (GO:0005739);; Biological Process: proteolysis (GO:0006508);; Cellular Component: integral to membrane (GO:0016021);;	--	Rhomboid protein 1, mitochondrial OS=Saccharomyces cerevisiae (strain ATCC 204508 / S288c) GN=PCP1 PE=1 SV=1	PREDICTED: uncharacterized protein C13E7.11-like [Cucumis sativus]
CL1282Contig1	p2	(TC)6	12	286	298	TAGCTTCCTCTCTCATCTTCC	55.42	21	CAAATGGAGATTCAATGGAG	55.56	20	166	--	--	Molecular Function: chromatin binding (GO:0003682);; Molecular Function: sequence-specific DNA binding transcription factor activity (GO:0003700);; Molecular Function: protein binding (GO:0005515);; Cellular Component: nucleolus (GO:0005730);; Biological Process: regulation of transcription, DNA-dependent (GO:0006355);; Biological Process: toxin catabolic process (GO:0009407);; Biological Process…	--	Trihelix transcription factor GT-3b OS=Arabidopsis thaliana GN=GT-3B PE=1 SV=1	transcription factor [Cucumis melo subsp. melo]
CL1282Contig1	p3	(ACC)5	15	477	492	GTTGGTTCATGAATTCCTCT	54.04	20	GGAGGAGGAGATACGAAAGT	54.95	20	151	--	--	Molecular Function: chromatin binding (GO:0003682);; Molecular Function: sequence-specific DNA binding transcription factor activity (GO:0003700);; Molecular Function: protein binding (GO:0005515);; Cellular Component: nucleolus (GO:0005730);; Biological Process: regulation of transcription, DNA-dependent (GO:0006355);; Biological Process: toxin catabolic process (GO:0009407);; Biological Process…	--	Trihelix transcription factor GT-3b OS=Arabidopsis thaliana GN=GT-3B PE=1 SV=1	transcription factor [Cucumis melo subsp. melo]
CL1282Contig1	p2	(TC)6	12	110	122	TAGCTTCCTCTCTCATCTTCC	55.42	21	CAAATGGAGATTCAATGGAG	55.56	20	166	--	--	Molecular Function: chromatin binding (GO:0003682);; Molecular Function: sequence-specific DNA binding transcription factor activity (GO:0003700);; Molecular Function: protein binding (GO:0005515);; Cellular Component: nucleolus (GO:0005730);; Biological Process: regulation of transcription, DNA-dependent (GO:0006355);; Biological Process: toxin catabolic process (GO:0009407);; Biological Process…	--	Trihelix transcription factor GT-3b OS=Arabidopsis thaliana GN=GT-3B PE=1 SV=1	transcription factor [Cucumis melo subsp. melo]
CL1282Contig1	p3	(ACC)5	15	301	316	GTTGGTTCATGAATTCCTCT	54.04	20	GGAGGAGGAGATACGAAAGT	54.95	20	151	--	--	Molecular Function: chromatin binding (GO:0003682);; Molecular Function: sequence-specific DNA binding transcription factor activity (GO:0003700);; Molecular Function: protein binding (GO:0005515);; Cellular Component: nucleolus (GO:0005730);; Biological Process: regulation of transcription, DNA-dependent (GO:0006355);; Biological Process: toxin catabolic process (GO:0009407);; Biological Process…	--	Trihelix transcription factor GT-3b OS=Arabidopsis thaliana GN=GT-3B PE=1 SV=1	transcription factor [Cucumis melo subsp. melo]
CL1331Contig1	p2	(GA)6	12	301	313	GAGAAGGAGAAGAAGTAAAGCA	54.86	22	TCCTCCAAGAATCTCTCTCTC	55.22	21	160	[TZDR]	--	Molecular Function: binding (GO:0005488);; Molecular Function: calcium ion binding (GO:0005509);; Cellular Component: endoplasmic reticulum (GO:0005783);; Cellular Component: Golgi apparatus (GO:0005794);; Cellular Component: plasma membrane (GO:0005886);; Biological Process: signal transduction (GO:0007165);; Biological Process: multicellular organismal development (GO:0007275);; Biological Proc…	--	Calumenin OS=Mus musculus GN=Calu PE=1 SV=1	PREDICTED: calumenin-B-like, partial [Cucumis sativus]
CL1331Contig1	p2	(GA)5	10	338	348	GGAAAGGAAGATTGAAGAGAC	54.66	21	TAAATTTCCCTCTCCTCCTC	55.02	20	108	[TZDR]	--	Molecular Function: binding (GO:0005488);; Molecular Function: calcium ion binding (GO:0005509);; Cellular Component: endoplasmic reticulum (GO:0005783);; Cellular Component: Golgi apparatus (GO:0005794);; Cellular Component: plasma membrane (GO:0005886);; Biological Process: signal transduction (GO:0007165);; Biological Process: multicellular organismal development (GO:0007275);; Biological Proc…	--	Calumenin OS=Mus musculus GN=Calu PE=1 SV=1	PREDICTED: calumenin-B-like, partial [Cucumis sativus]
CL1403Contig1	p6	(TCTGCG)5	30	24	54	TTTTCCATCCTTCTTCTCTC	53.58	20	CCACTCATGTAGAACAACAGAA	55.41	22	157	[R]	General function prediction only	Molecular Function: catalytic activity (GO:0003824);; Molecular Function: protein binding (GO:0005515);; Cellular Component: cytosol (GO:0005829);; Biological Process: epidermal growth factor receptor signaling pathway (GO:0007173);; Biological Process: insulin receptor signaling pathway (GO:0008286);; Biological Process: fibroblast growth factor receptor signaling pathway (GO:0008543);; Molecula…	K08266|0.0|pop:POPTR_667428|hypothetical protein	Protein LST8 homolog OS=Dictyostelium discoideum GN=lst8 PE=1 SV=1	PREDICTED: protein LST8 homolog [Cucumis sativus]
CL1403Contig1	p3	(ATT)6	18	301	319	CTCATTTATGCAGCCACTTT	55.58	20	TGCCTGGTCAAAACTACTACT	54.25	21	177	[R]	General function prediction only	Molecular Function: catalytic activity (GO:0003824);; Molecular Function: protein binding (GO:0005515);; Cellular Component: cytosol (GO:0005829);; Biological Process: epidermal growth factor receptor signaling pathway (GO:0007173);; Biological Process: insulin receptor signaling pathway (GO:0008286);; Biological Process: fibroblast growth factor receptor signaling pathway (GO:0008543);; Molecula…	K08266|0.0|pop:POPTR_667428|hypothetical protein	Protein LST8 homolog OS=Dictyostelium discoideum GN=lst8 PE=1 SV=1	PREDICTED: protein LST8 homolog [Cucumis sativus]
CL1728Contig1	p3	(GAA)6	18	301	319	CACTATCCCTTTGAGCAACTA	54.75	21	TTTTGTTCTTCACCATCTCC	55.17	20	149	--	--	Molecular Function: protein binding (GO:0005515);; Biological Process: response to oxidative stress (GO:0006979);; Biological Process: positive regulation of cell proliferation (GO:0008284);; Biological Process: negative regulation of anthocyanin metabolic process (GO:0031538);; Cellular Component: Elongator holoenzyme complex (GO:0033588);; Biological Process: regulation of leaf development (GO:…	--	Elongator complex protein 6 OS=Arabidopsis thaliana GN=ELP6 PE=1 SV=1	PREDICTED: elongator complex protein 6-like [Cucumis sativus]
CL1733Contig1	p2	(TC)8	16	37	53	TCTCTCTCTTCTTTCTCTCTCT	51.09	22	TTTGTTTCTCTCCCTCTTCA	55.05	20	127	[O]	Posttranslational modification, protein turnover, chaperones	Molecular Function: ATP binding (GO:0005524);; Cellular Component: extracellular region (GO:0005576);; Cellular Component: cell wall (GO:0005618);; Cellular Component: mitochondrion (GO:0005739);; Cellular Component: vacuolar membrane (GO:0005774);; Cellular Component: Golgi apparatus (GO:0005794);; Cellular Component: cytosol (GO:0005829);; Cellular Component: plasma membrane (GO:0005886);; Biol…	--	Microtubule-associated protein 70-2 OS=Oryza sativa subsp. japonica GN=MAP70.2 PE=2 SV=1	PREDICTED: microtubule-associated protein 70-2-like [Cucumis sativus]
CL1733Contig1	p3	(TCT)6	18	63	81	CCAGTCCCAATACTTCTCAGT	55.83	21	GCCCTAGAAAATCATAAGCA	54.75	20	145	[O]	Posttranslational modification, protein turnover, chaperones	Molecular Function: ATP binding (GO:0005524);; Cellular Component: extracellular region (GO:0005576);; Cellular Component: cell wall (GO:0005618);; Cellular Component: mitochondrion (GO:0005739);; Cellular Component: vacuolar membrane (GO:0005774);; Cellular Component: Golgi apparatus (GO:0005794);; Cellular Component: cytosol (GO:0005829);; Cellular Component: plasma membrane (GO:0005886);; Biol…	--	Microtubule-associated protein 70-2 OS=Oryza sativa subsp. japonica GN=MAP70.2 PE=2 SV=1	PREDICTED: microtubule-associated protein 70-2-like [Cucumis sativus]
CL1733Contig1	p3	(TTC)7	21	121	142	GGTTTGGATTCTTCTCCTTC	55.33	20	AGATCTGCTTCTTCAAGTCCT	54.92	21	147	[O]	Posttranslational modification, protein turnover, chaperones	Molecular Function: ATP binding (GO:0005524);; Cellular Component: extracellular region (GO:0005576);; Cellular Component: cell wall (GO:0005618);; Cellular Component: mitochondrion (GO:0005739);; Cellular Component: vacuolar membrane (GO:0005774);; Cellular Component: Golgi apparatus (GO:0005794);; Cellular Component: cytosol (GO:0005829);; Cellular Component: plasma membrane (GO:0005886);; Biol…	--	Microtubule-associated protein 70-2 OS=Oryza sativa subsp. japonica GN=MAP70.2 PE=2 SV=1	PREDICTED: microtubule-associated protein 70-2-like [Cucumis sativus]
CL1733Contig1	p3	(TTC)5	15	301	316	GGCGAGTAATCACATTAACAG	55.02	21	ATCAACATCAGAACCAGTACG	55.17	21	136	[O]	Posttranslational modification, protein turnover, chaperones	Molecular Function: ATP binding (GO:0005524);; Cellular Component: extracellular region (GO:0005576);; Cellular Component: cell wall (GO:0005618);; Cellular Component: mitochondrion (GO:0005739);; Cellular Component: vacuolar membrane (GO:0005774);; Cellular Component: Golgi apparatus (GO:0005794);; Cellular Component: cytosol (GO:0005829);; Cellular Component: plasma membrane (GO:0005886);; Biol…	--	Microtubule-associated protein 70-2 OS=Oryza sativa subsp. japonica GN=MAP70.2 PE=2 SV=1	PREDICTED: microtubule-associated protein 70-2-like [Cucumis sativus]
CL1798Contig1	p3	(GGT)6	18	301	319	TTCAGCTGTCCAAGGTTTAC	55.45	20	CATATTGTACTGCGGATGTTG	56.66	21	136	--	--	Molecular Function: protein binding (GO:0005515);; Cellular Component: extracellular region (GO:0005576);; Biological Process: response to stress (GO:0006950);; Biological Process: organelle organization (GO:0006996);; Biological Process: protein metabolic process (GO:0019538);; Biological Process: cellular macromolecule biosynthetic process (GO:0034645);; Cellular Component: histone methyltransf…	--	Histidine-rich glycoprotein OS=Plasmodium lophurae PE=4 SV=1	PREDICTED: uncharacterized LOC101203695 [Cucumis sativus]
CL1828Contig1	p3	(AGA)5	15	301	316	AGAGAAACCGGTCCAATATC	55.65	20	GTGCCTTGAACTTCTTGTAAC	54.19	21	194	[R]	General function prediction only	--	--	Ankyrin repeat-containing protein At5g02620 OS=Arabidopsis thaliana GN=At5g02620 PE=1 SV=1	PREDICTED: ankyrin repeat-containing protein At5g02620-like [Cucumis sativus]
CL1863Contig1	p2	(TG)8	16	301	317	CAAGCAAGAAGGTTGCTTAT	54.89	20	TTCTCTCTCCCTCAAACAAA	55.05	20	152	--	--	Molecular Function: cysteine-type endopeptidase activity (GO:0004197);; Molecular Function: binding (GO:0005488);; Cellular Component: nucleus (GO:0005634);; Cellular Component: cytosol (GO:0005829);; Cellular Component: plasma membrane (GO:0005886);; Biological Process: transcription, DNA-dependent (GO:0006351);; Biological Process: proteolysis (GO:0006508);; Biological Process: calcium ion tran…	--	Metacaspase-9 OS=Arabidopsis thaliana GN=AMC9 PE=1 SV=1	PREDICTED: metacaspase-9-like [Cucumis sativus]
CL1863Contig1	p4	(AAAT)5	20	301	321	CCTACCAACTCCAACATAACA	55.19	21	GTAGAGGAAGAATTTGGCTTC	54.88	21	163	--	--	Molecular Function: cysteine-type endopeptidase activity (GO:0004197);; Molecular Function: binding (GO:0005488);; Cellular Component: nucleus (GO:0005634);; Cellular Component: cytosol (GO:0005829);; Cellular Component: plasma membrane (GO:0005886);; Biological Process: transcription, DNA-dependent (GO:0006351);; Biological Process: proteolysis (GO:0006508);; Biological Process: calcium ion tran…	--	Metacaspase-9 OS=Arabidopsis thaliana GN=AMC9 PE=1 SV=1	PREDICTED: metacaspase-9-like [Cucumis sativus]
CL1937Contig1	p3	(TTC)6	18	301	319	CCTAGATCGACACATCCTTTA	54.5	21	GTATGGAATTGGAAGAAGCA	55.3	20	162	[CR]	--	Molecular Function: zinc ion binding (GO:0008270);; Cellular Component: plastid envelope (GO:0009526);; Cellular Component: membrane (GO:0016020);; Molecular Function: oxidoreductase activity (GO:0016491);; Molecular Function: ion binding (GO:0043167);; Cellular Component: chloroplast part (GO:0044434);; Molecular Function: cofactor binding (GO:0048037);; Biological Process: oxidation-reduction p…	--	Quinone oxidoreductase-like protein At1g23740, chloroplastic OS=Arabidopsis thaliana GN=At1g23740 PE=1 SV=2	hypothetical protein PRUPE_ppa008712mg [Prunus persica]
CL2203Contig1	p3	(TGA)5	15	301	316	GGGTTAGGAAGATCTGTTGAT	54.82	21	TGCTTTGCTCATGTTCTATG	55.03	20	150	[V]	Defense mechanisms	Biological Process: regulation of organ formation (GO:0003156);; Cellular Component: plasma membrane (GO:0005886);; Biological Process: cation transport (GO:0006812);; Biological Process: drug transmembrane transport (GO:0006855);; Biological Process: response to nematode (GO:0009624);; Biological Process: response to hormone stimulus (GO:0009725);; Molecular Function: drug transmembrane transpor…	--	MATE efflux family protein 5 OS=Arabidopsis thaliana GN=DTXL1 PE=3 SV=1	predicted protein [Populus trichocarpa]
CL2240Contig1	p2	(CT)8	16	157	173	AGATCCATGGTTTTCTCCTT	55.21	20	TAGGAAGATCTACTGCGATTG	54.83	21	149	--	--	Biological Process: regulation of cytokine production (GO:0001817);; Biological Process: toll-like receptor signaling pathway (GO:0002224);; Molecular Function: prenyltransferase activity (GO:0004659);; Cellular Component: nucleus (GO:0005634);; Biological Process: regulation of transcription, DNA-dependent (GO:0006355);; Biological Process: protein complex assembly (GO:0006461);; Biological Proc…	K12501|1e-173|vvi:100246957|hypothetical protein LOC100246957	TNF receptor-associated factor 6 OS=Homo sapiens GN=TRAF6 PE=1 SV=1	PREDICTED: LOW QUALITY PROTEIN: uncharacterized protein LOC101230210 [Cucumis sativus]
CL2430Contig1	p2	(CT)8	12	301	313	AGCCATATCTACGCCTAAACT	55	21	GAGAAGGGAAAAGAGCATTC	55.65	20	149	[R]	General function prediction only	Molecular Function: histone acetyltransferase activity (GO:0004402);; Cellular Component: microtubule (GO:0005874);; Biological Process: histone acetylation (GO:0016573);; Molecular Function: Rab GTPase binding (GO:0017137);; Biological Process: regulation of cell migration (GO:0030334);; Cellular Component: histone methyltransferase complex (GO:0035097);; Cellular Component: perinuclear region o…	--	Uncharacterized WD repeat-containing protein C3H5.08c OS=Schizosaccharomyces pombe (strain 972 / ATCC 24843) GN=SPAC3H5.08c PE=1 SV=2	PREDICTED: uncharacterized protein LOC101207772 [Cucumis sativus]
CL2483Contig1	p3	(TGA)5	15	301	316	GCCTCATAAGGAACAATATCC	55.35	21	CTTTCACTCTCAACCCTTCTC	55.67	21	178	--	--	--	--	--	PREDICTED: uncharacterized protein LOC101206051 [Cucumis sativus]
CL2514Contig1	p3	(TCT)7	21	158	179	ATTTCTTTTGGAAGGAGGTG	55.86	20	GAAGAAGAAATTCCAGAGAGC	54.98	21	147	[D]	Cell cycle control, cell division, chromosome partitioning	Biological Process: mitotic cell cycle (GO:0000278);; Molecular Function: protein binding (GO:0005515);; Biological Process: cell cycle (GO:0007049);; Biological Process: stomatal lineage progression (GO:0010440);; Biological Process: DNA endoreduplication (GO:0042023);; Biological Process: regulation of cell proliferation (GO:0042127);; Biological Process: negative regulation of cyclin-dependent…	K14505|1e-118|pop:POPTR_549935|hypothetical protein	Cyclin-D3-1 OS=Arabidopsis thaliana GN=CYCD3-1 PE=1 SV=3	Cyclin-D3-1 [Theobroma cacao]
CL2573Contig1	p3	(GAG)5	15	301	316	ATTAGTAGGGAGTTGGGTTTG	54.97	21	TCCACAGCTCTATCATCTCAG	55.56	21	163	--	--	Biological Process: negative regulation of cell proliferation (GO:0008285);; Cellular Component: chloroplast (GO:0009507);; Biological Process: lateral root morphogenesis (GO:0010102);;	--	Protein ROOT PRIMORDIUM DEFECTIVE 1 OS=Arabidopsis thaliana GN=RPD1 PE=1 SV=1	PREDICTED: uncharacterized protein LOC101211236 [Cucumis sativus]
CL2803Contig1	p3	(CGC)7	21	149	170	TGAGGTAGAGAAACACAAGGA	55.01	21	ATGTGCTACGGTTCATTTTC	55.24	20	208	--	--	Molecular Function: binding (GO:0005488);; Molecular Function: protein binding (GO:0005515);; Cellular Component: mitochondrion (GO:0005739);; Biological Process: regulation of transcription, DNA-dependent (GO:0006355);; Biological Process: chromosome segregation (GO:0007059);; Biological Process: meiosis I (GO:0007127);; Cellular Component: chloroplast (GO:0009507);; Biological Process: tissue d…	--	Pentatricopeptide repeat-containing protein At3g18970 OS=Arabidopsis thaliana GN=PCMP-E93 PE=2 SV=1	hypothetical protein PRUPE_ppa025445mg [Prunus persica]
CL2827Contig1	p3	(TCA)5	15	301	316	CTTTTACCACCTTCCAGATTC	55.47	21	ACAGTGACACTTTTGAAGACC	54.29	21	148	--	--	Biological Process: mitotic cell cycle (GO:0000278);; Molecular Function: protease binding (GO:0002020);; Cellular Component: nucleus (GO:0005634);; Biological Process: transcription, DNA-dependent (GO:0006351);; Biological Process: RNA processing (GO:0006396);; Biological Process: response to stress (GO:0006950);; Biological Process: sister chromatid cohesion (GO:0007062);; Biological Process: s…	--	Nuclear factor related to kappa-B-binding protein OS=Homo sapiens GN=NFRKB PE=1 SV=2	PREDICTED: uncharacterized protein LOC101213939 [Cucumis sativus]
CL2827Contig1	p3	(GAA)6	18	301	319	GACGGTTGTTAAAGGAAAGAG	55.7	21	CTCCATTAACCATTTCAAGC	54.9	20	151	--	--	Biological Process: mitotic cell cycle (GO:0000278);; Molecular Function: protease binding (GO:0002020);; Cellular Component: nucleus (GO:0005634);; Biological Process: transcription, DNA-dependent (GO:0006351);; Biological Process: RNA processing (GO:0006396);; Biological Process: response to stress (GO:0006950);; Biological Process: sister chromatid cohesion (GO:0007062);; Biological Process: s…	--	Nuclear factor related to kappa-B-binding protein OS=Homo sapiens GN=NFRKB PE=1 SV=2	PREDICTED: uncharacterized protein LOC101213939 [Cucumis sativus]
CL2884Contig1	p2	(AG)7	14	121	135	GCACATCCTAGTTATCTTCCA	54.49	21	CCTTCTTCCCCATTTACTTT	55	20	146	--	--	Molecular Function: catalytic activity (GO:0003824);; Molecular Function: binding (GO:0005488);; Cellular Component: cytoplasm (GO:0005737);; Biological Process: lipid transport (GO:0006869);; Biological Process: response to organic substance (GO:0010033);; Biological Process: cellular nitrogen compound metabolic process (GO:0034641);; Cellular Component: intracellular organelle (GO:0043229);; Bi…	--	Kelch domain-containing protein 4 OS=Pongo abelii GN=KLHDC4 PE=2 SV=1	PREDICTED: kelch domain-containing protein 4-like [Cucumis sativus]
CL2913Contig1	p2	(AT)10	20	301	321	GAAGCAACCTCCTACCTTTT	55.21	20	AGCATCGGGCTATATCATTA	54.98	20	143	--	--	Cellular Component: extracellular region (GO:0005576);; Cellular Component: plasma membrane (GO:0005886);; Biological Process: response to ethylene stimulus (GO:0009723);; Biological Process: multidimensional cell growth (GO:0009825);;	--	UPF0378 protein KIAA0100 OS=Homo sapiens GN=KIAA0100 PE=1 SV=3	PREDICTED: uncharacterized protein LOC101207547 [Cucumis sativus]
CL3022Contig1	p3	(TTC)7	21	301	322	CTTCTCCATTGCTATTTGCT	54.81	20	GCTACTGTTACGTCGAGAAGA	54.96	21	125	--	--	Molecular Function: carboxypeptidase activity (GO:0004180);; Molecular Function: binding (GO:0005488);; Cellular Component: extracellular region (GO:0005576);; Cellular Component: vacuolar membrane (GO:0005774);; Cellular Component: endoplasmic reticulum (GO:0005783);; Cellular Component: Golgi apparatus (GO:0005794);; Biological Process: protein glycosylation (GO:0006486);; Biological Process: N…	--	Nodal modulator 1 OS=Mus musculus GN=Nomo1 PE=1 SV=1	PREDICTED: nodal modulator 2-like [Cucumis sativus]
CL3237Contig1	p3	(TCA)6	18	301	319	CATCATCAGTCTCCATTCTGT	55.03	21	GCCTCTCAGATTGTGATAAAG	54.19	21	156	--	--	Biological Process: mitotic cell cycle (GO:0000278);; Biological Process: double-strand break repair via homologous recombination (GO:0000724);; Molecular Function: protein binding (GO:0005515);; Biological Process: DNA replication initiation (GO:0006270);; Biological Process: regulation of DNA replication (GO:0006275);; Biological Process: DNA methylation (GO:0006306);; Biological Process: nucle…	--	Chromatin assembly factor 1 subunit FAS1 OS=Arabidopsis thaliana GN=FAS1 PE=1 SV=1	PREDICTED: chromatin assembly factor 1 subunit FAS1-like [Cucumis sativus]
CL3313Contig1	p2	(GA)9	18	301	319	CAGAAGTTTTAGCGACTCAGA	55.1	21	AAATAGATGCCAGAGCAATC	54.54	20	183	--	--	Molecular Function: protein binding (GO:0005515);; Cellular Component: nucleus (GO:0005634);; Molecular Function: lipid binding (GO:0008289);; Biological Process: cellular process (GO:0009987);; Cellular Component: cytoplasmic part (GO:0044444);; Biological Process: regulation of macromolecule metabolic process (GO:0060255);; Biological Process: membrane fusion (GO:0061025);;	K14012|1e-164|pop:POPTR_568093|hypothetical protein	UBA and UBX domain-containing protein At4g15410 OS=Arabidopsis thaliana GN=At4g15410 PE=2 SV=1	PREDICTED: UBA and UBX domain-containing protein At4g15410-like isoform 1 [Cucumis sativus]
CL3317Contig1	p3	(CCA)5	15	301	316	GGAGGAAGAAATCAAGTAGGA	55.12	21	GGGATTGATATCCATAAGGTG	55.88	21	133	[R]	General function prediction only	Molecular Function: nucleic acid binding (GO:0003676);; Molecular Function: RNA binding (GO:0003723);; Cellular Component: nucleus (GO:0005634);; Biological Process: mRNA processing (GO:0006397);; Biological Process: response to osmotic stress (GO:0006970);; Biological Process: cell cycle (GO:0007049);; Biological Process: RNA splicing (GO:0008380);; Biological Process: response to cold (GO:00094…	--	RNA-binding protein 24 OS=Danio rerio GN=rbm24 PE=2 SV=1	PREDICTED: uncharacterized protein LOC101221584 [Cucumis sativus]
CL3353Contig1	p3	(TCT)5	15	301	316	AGACCCAAACAACTTGAAAC	54.23	20	GCAGTTTCGATCTTATAGAGCA	56.51	22	157	--	--	Molecular Function: binding (GO:0005488);; Biological Process: transcription, DNA-dependent (GO:0006351);; Biological Process: response to stress (GO:0006950);; Biological Process: response to abiotic stimulus (GO:0009628);; Biological Process: response to hormone stimulus (GO:0009725);; Biological Process: regulation of cellular process (GO:0050794);;	--	Zinc finger protein ZAT9 OS=Arabidopsis thaliana GN=ZAT9 PE=2 SV=1	PREDICTED: zinc finger protein ZAT9-like [Cucumis sativus]
CL3353Contig1	p2	(CT)5	10	524	534	AAGATCGGAGCTTTCTCTCT	54.98	20	CCCCAATCCTTCTTTACTCT	54.98	20	146	--	--	Molecular Function: binding (GO:0005488);; Biological Process: transcription, DNA-dependent (GO:0006351);; Biological Process: response to stress (GO:0006950);; Biological Process: response to abiotic stimulus (GO:0009628);; Biological Process: response to hormone stimulus (GO:0009725);; Biological Process: regulation of cellular process (GO:0050794);;	--	Zinc finger protein ZAT9 OS=Arabidopsis thaliana GN=ZAT9 PE=2 SV=1	PREDICTED: zinc finger protein ZAT9-like [Cucumis sativus]
CL3478Contig1	p2	(CT)6	12	301	313	GTTTTTCCAGGTTCTCTCTTC	54.74	21	CTGCTTTACATTACACTCATGC	55.27	22	154	--	--	Molecular Function: sequence-specific DNA binding transcription factor activity (GO:0003700);; Cellular Component: plasma membrane (GO:0005886);; Biological Process: regulation of transcription, DNA-dependent (GO:0006355);; Molecular Function: kinase activity (GO:0016301);; Molecular Function: sequence-specific DNA binding (GO:0043565);; Biological Process: cellular response to zinc ion (GO:00712…	--	Calcium-dependent protein kinase 8 OS=Arabidopsis thaliana GN=CPK8 PE=1 SV=1	PREDICTED: uncharacterized protein LOC101219501 [Cucumis sativus]
CL3478Contig1	p3	(TCT)5	15	301	316	TACGTGGGATGTTTATGTGAC	55.89	21	GAATGGTACTCTGAGGTTCGT	55.82	21	171	--	--	Molecular Function: sequence-specific DNA binding transcription factor activity (GO:0003700);; Cellular Component: plasma membrane (GO:0005886);; Biological Process: regulation of transcription, DNA-dependent (GO:0006355);; Molecular Function: kinase activity (GO:0016301);; Molecular Function: sequence-specific DNA binding (GO:0043565);; Biological Process: cellular response to zinc ion (GO:00712…	--	Calcium-dependent protein kinase 8 OS=Arabidopsis thaliana GN=CPK8 PE=1 SV=1	PREDICTED: uncharacterized protein LOC101219501 [Cucumis sativus]
CL3602Contig1	p2	(CT)6	12	135	147	GGCAGCAAACGTAACTATATC	54.33	21	GACCCGTCTTCATTTATCAGT	55.74	21	171	[RTKL]	--	Molecular Function: nucleotide binding (GO:0000166);; Molecular Function: protein kinase activity (GO:0004672);; Molecular Function: binding (GO:0005488);; Biological Process: cellular protein modification process (GO:0006464);; Biological Process: response to stress (GO:0006950);; Biological Process: cell communication (GO:0007154);; Cellular Component: membrane (GO:0016020);; Biological Process…	--	G-type lectin S-receptor-like serine/threonine-protein kinase RLK1 OS=Arabidopsis thaliana GN=RLK1 PE=2 SV=2	PREDICTED: G-type lectin S-receptor-like serine/threonine-protein kinase RLK1-like [Cucumis sativus]
CL4445Contig1	p3	(ATG)5	15	290	305	GGTTTCCCATCTCACACTAAT	55.58	21	TTGTTAAAGTCGGGGTAAAC	54.44	20	157	[R]	General function prediction only	Molecular Function: nucleotide binding (GO:0000166);; Biological Process: alternative nuclear mRNA splicing, via spliceosome (GO:0000380);; Molecular Function: nucleic acid binding (GO:0003676);; Molecular Function: double-stranded DNA binding (GO:0003690);; Molecular Function: single-stranded DNA binding (GO:0003697);; Molecular Function: mRNA 3'-UTR binding (GO:0003730);; Molecular Function: pr…	--	RNA-binding protein 24 OS=Danio rerio GN=rbm24 PE=2 SV=1	PREDICTED: uncharacterized protein LOC101210354 [Cucumis sativus]
CL4567Contig1	p3	(GAA)7	21	301	322	GTCGAAGAAACCCTAGATTGT	55.06	21	CTCTACAGACTGCTGGACAAC	55.1	21	160	[O]	Posttranslational modification, protein turnover, chaperones	Molecular Function: protein binding (GO:0005515);; Biological Process: nucleotide-excision repair (GO:0006289);; Biological Process: response to organic cyclic compound (GO:0014070);; Biological Process: viral reproduction (GO:0016032);; Biological Process: regulation of cellular metabolic process (GO:0031323);; Molecular Function: ubiquitin protein ligase binding (GO:0031625);; Cellular Componen…	K10839|1e-116|rcu:RCOM_1442860|uv excision repair protein rad23, putative	Ubiquitin receptor RAD23b OS=Arabidopsis thaliana GN=RAD23B PE=1 SV=3	PREDICTED: putative DNA repair protein RAD23-1-like [Cucumis sativus]
CL5115Contig1	p2	(GA)6	12	301	313	AGCAGAGAGAAAGAGAAGGAA	55.22	21	TAAGCCAACCAGAACAAATC	55.38	20	153	--	--	Cellular Component: vacuole (GO:0005773);;	--	StAR-related lipid transfer protein 7, mitochondrial OS=Homo sapiens GN=STARD7 PE=1 SV=2	PREDICTED: uncharacterized protein LOC101209462 [Cucumis sativus]
CL5155Contig1	p3	(TGC)5	15	301	316	CAAGTGAAGTAAAGGGTCGTT	56.05	21	CCACTCAATCACAATCTCAAC	55.56	21	150	--	--	Cellular Component: nucleus (GO:0005634);; Biological Process: cellular membrane fusion (GO:0006944);;	--	--	PREDICTED: LOW QUALITY PROTEIN: uncharacterized protein LOC101220036 [Cucumis sativus]
CL5305Contig1	p2	(AG)7	14	301	315	CCGCTAAACTATACTCGTTCC	55.84	21	ACATTTGGGAGTTTCTCTCTC	55.01	21	171	--	--	Biological Process: mitotic cell cycle (GO:0000278);; Biological Process: regionalization (GO:0003002);; Molecular Function: actin binding (GO:0003779);; Molecular Function: protein binding (GO:0005515);; Cellular Component: plasma membrane (GO:0005886);; Biological Process: chromatin organization (GO:0006325);; Biological Process: reciprocal meiotic recombination (GO:0007131);; Biological Proces…	--	Protein SCAR2 OS=Arabidopsis thaliana GN=SCAR2 PE=1 SV=1	PREDICTED: uncharacterized protein LOC101215386 [Cucumis sativus]
CL5324Contig1	p3	(GAA)5	15	301	316	GATGATCAGCAATGGAAGTT	55.1	20	CCTGTATTTGCACAACCTACT	54.54	21	154	[RTKL]	--	Molecular Function: ATP binding (GO:0005524);; Cellular Component: cytosol (GO:0005829);; Cellular Component: plasma membrane (GO:0005886);; Biological Process: mRNA processing (GO:0006397);; Biological Process: protein phosphorylation (GO:0006468);; Molecular Function: RNA polymerase II carboxy-terminal domain kinase activity (GO:0008353);; Biological Process: RNA splicing (GO:0008380);; Biologi…	--	Probable serine/threonine-protein kinase At1g54610 OS=Arabidopsis thaliana GN=At1g54610 PE=1 SV=1	PREDICTED: probable serine/threonine-protein kinase At1g54610-like [Cucumis sativus]
CL6417Contig1	p3	(CTA)7	21	301	322	CTCAGCAGGAGATTGAGTCTA	54.83	21	CACAATCCTCATAACCCTTAG	53.97	21	177	--	--	Molecular Function: binding (GO:0005488);; Cellular Component: nucleus (GO:0005634);; Cellular Component: cytoplasm (GO:0005737);; Biological Process: regulation of flower development (GO:0009909);; Biological Process: cellular process (GO:0009987);; Cellular Component: membrane (GO:0016020);; Molecular Function: hydrolase activity (GO:0016787);; Cellular Component: intracellular membrane-bounded…	--	Deneddylase OS=Human herpesvirus 1 (strain 17) GN=UL36 PE=1 SV=1	PREDICTED: uncharacterized protein LOC101202983 [Cucumis sativus]
CL7571Contig1	p3	(TAG)5	15	301	316	CCATCCATTCCCTACTCTATT	54.81	21	CGTTGGAGAGGTAAAATGTAG	54.22	21	162	--	--	Biological Process: MAPK cascade (GO:0000165);; Biological Process: respiratory burst involved in defense response (GO:0002679);; Molecular Function: copper ion binding (GO:0005507);; Cellular Component: extracellular region (GO:0005576);; Cellular Component: cytosol (GO:0005829);; Cellular Component: plasma membrane (GO:0005886);; Biological Process: protein targeting to membrane (GO:0006612);; …	--	MACPF domain-containing protein At4g24290 OS=Arabidopsis thaliana GN=At4g24290 PE=2 SV=1	PREDICTED: MACPF domain-containing protein At4g24290-like, partial [Cucumis sativus]
CL8360Contig1	p2	(AT)9	18	301	319	GGAAGCAAACTGAGATGAAC	54.89	20	TAATGGACTACTGAGGCTTTG	54.75	21	149	[R]	General function prediction only	Biological Process: microtubule cytoskeleton organization (GO:0000226);; Biological Process: vasculature development (GO:0001944);; Biological Process: developmental process involved in reproduction (GO:0003006);; Molecular Function: RNA binding (GO:0003723);; Molecular Function: guanyl-nucleotide exchange factor activity (GO:0005085);; Biological Process: regulation of transcription, DNA-depende…	--	Vegetative incompatibility protein HET-E-1 OS=Podospora anserina GN=HET-E1 PE=4 SV=1	PREDICTED: uncharacterized protein LOC101212131 [Cucumis sativus]
CL8625Contig1	p2	(GA)8	16	301	317	AGTCATTGGTTTCTCTCTTGTC	55.1	22	CAATCGCTTCATCTCTCTCTA	54.93	21	143	--	--	Molecular Function: transporter activity (GO:0005215);; Biological Process: transport (GO:0006810);; Biological Process: lipid biosynthetic process (GO:0008610);; Biological Process: response to ethylene stimulus (GO:0009723);; Biological Process: abscisic acid mediated signaling pathway (GO:0009738);; Biological Process: regulation of biosynthetic process (GO:0009889);; Biological Process: cellu…	--	SEC14-like protein 2 OS=Bos taurus GN=SEC14L2 PE=1 SV=2	PREDICTED: LOW QUALITY PROTEIN: CRAL-TRIO domain-containing protein T23G5.2-like [Cucumis sativus]
CL8640Contig1	p2	(AG)8	16	100	116	CAACGAAACACTCTTCGAGTA	55.72	21	GAACTCGATGACTTCCTTTTC	55.58	21	164	--	--	Biological Process: cell cycle process (GO:0022402);;	--	Protein bicaudal C homolog 1-A OS=Xenopus laevis GN=bicc1-a PE=2 SV=1	PREDICTED: uncharacterized protein LOC101207992 [Cucumis sativus]
CL8640Contig1	p3	(CT)5	10	199	209	GAGAGAGAGAGATCAGCAGGT	55.31	21	TTGTCTTTAAGGAAGGGAGTC	55.2	21	172	--	--	Biological Process: cell cycle process (GO:0022402);;	--	Protein bicaudal C homolog 1-A OS=Xenopus laevis GN=bicc1-a PE=2 SV=1	PREDICTED: uncharacterized protein LOC101207992 [Cucumis sativus]
CL8677Contig1	p3	(ATC)5	15	301	316	CAACCCTCTCACTAAAATTCC	55.47	21	GGCTTCGGATGTTTATAAGTC	55.58	21	143	--	--	Cellular Component: nucleus (GO:0005634);; Cellular Component: mitochondrion (GO:0005739);; Biological Process: carbohydrate metabolic process (GO:0005975);; Biological Process: phosphate-containing compound metabolic process (GO:0006796);; Biological Process: cell cycle (GO:0007049);; Biological Process: mRNA modification (GO:0016556);; Biological Process: cellular macromolecule metabolic proces…	--	Pentatricopeptide repeat-containing protein At4g30825, chloroplastic OS=Arabidopsis thaliana GN=At4g30825 PE=2 SV=2	PREDICTED: pentatricopeptide repeat-containing protein At4g30825, chloroplastic-like [Cucumis sativus]
CL8700Contig1	p3	(AAG)5	15	247	262	GAGCAGTTCATTTCAAGTGTG	55.98	21	AGGCCTTTCCAGTTGTTTA	54.95	19	151	[I]	Lipid transport and metabolism	Molecular Function: triglyceride lipase activity (GO:0004806);; Cellular Component: cytoplasm (GO:0005737);; Cellular Component: mitochondrion (GO:0005739);; Biological Process: response to stress (GO:0006950);; Biological Process: lipid biosynthetic process (GO:0008610);; Molecular Function: phosphatidylcholine 1-acylhydrolase activity (GO:0008970);; Cellular Component: chloroplast (GO:0009507);…	--	Phospholipase A1-IIgamma OS=Arabidopsis thaliana GN=DSEL PE=1 SV=1	PREDICTED: phospholipase A1-IIgamma-like [Cucumis sativus]
CL8727Contig1	p3	(TCT)6	18	301	319	AGACATAATCTCTTCCCTCTGA	54.72	22	AGGAGGAAGAAAAGGAGAAAG	55.96	21	151	--	--	Biological Process: microtubule cytoskeleton organization (GO:0000226);; Biological Process: cytokinesis by cell plate formation (GO:0000911);; Cellular Component: cytoplasm (GO:0005737);; Cellular Component: plasma membrane (GO:0005886);; Biological Process: cell proliferation (GO:0008283);; Cellular Component: chloroplast (GO:0009507);; Cellular Component: secondary cell wall (GO:0009531);; Bio…	--	Rho GTPase-activating protein 2 OS=Arabidopsis thaliana GN=ROPGAP2 PE=1 SV=1	PREDICTED: uncharacterized protein LOC101220148 [Cucumis sativus]
CL8815Contig1	p2	(CT)7	14	46	60	CTCTCGTTCTCTTGTTTCAGA	54.88	21	CTCTGTTCCAAAAACCCATA	55.23	20	144	--	--	--	--	--	PREDICTED: uncharacterized protein LOC101203509 [Cucumis sativus]
CL8815Contig1	p3	(GAG)5	15	234	249	TATGGGTTTTTGGAACAGAG	55.23	20	TCTTCCTTTCAAACTGCTTC	54.79	20	151	--	--	--	--	--	PREDICTED: uncharacterized protein LOC101203509 [Cucumis sativus]
CL8815Contig1	p4	(CTCA)5	20	58	78	CTCTCGTTCTCTTGTTTCAGA	54.88	21	CTCTGTTCCAAAAACCCATA	55.23	20	144	--	--	--	--	--	PREDICTED: uncharacterized protein LOC101203509 [Cucumis sativus]
CL8833Contig1	p2	(TC)6	12	55	67	CTATCCGTTAACCCTAACTCC	54.68	21	AGATTCAGCAACAGTAGTGGA	55.04	21	163	--	--	Cellular Component: chloroplast (GO:0009507);;	--	--	PREDICTED: uncharacterized protein LOC101215717 [Cucumis sativus]
CL8833Contig1	p2	(CT)5	10	68	78	AACCCTAACTCCCTTCTCTCT	55.3	21	AGATTCAGCAACAGTAGTGGA	55.04	21	154	--	--	Cellular Component: chloroplast (GO:0009507);;	--	--	PREDICTED: uncharacterized protein LOC101215717 [Cucumis sativus]
CL8851Contig1	p3	(ATG)5	15	301	316	GAGAAGGGAAAGAAAACCAA	55.99	20	ACAAACAAACCCTTCCTTTC	55.77	20	152	--	--	--	--	--	PREDICTED: uncharacterized protein LOC101217581 [Cucumis sativus]
CL8893Contig1	p3	(GAA)5	15	190	205	ACAAATGGGCTGGAATTAG	55.16	19	CTCCTTATCATTCCTCAACCT	54.99	21	164	--	--	Molecular Function: calmodulin binding (GO:0005516);; Cellular Component: nucleus (GO:0005634);; Biological Process: defense response (GO:0006952);; Biological Process: glucosinolate biosynthetic process (GO:0019761);;	--	Protein IQ-DOMAIN 1 OS=Arabidopsis thaliana GN=IQD1 PE=1 SV=1	PREDICTED: protein IQ-DOMAIN 1-like [Cucumis sativus]
CL8974Contig1	p2	(GA)9	18	301	319	ATGGTGGTTGATCCTGTTTA	55.34	20	CTAATGTCCCTCCATACCTCT	54.87	21	139	--	--	Molecular Function: sequence-specific DNA binding transcription factor activity (GO:0003700);; Molecular Function: protein binding (GO:0005515);; Cellular Component: nucleus (GO:0005634);; Cellular Component: cytosol (GO:0005829);; Biological Process: regulation of transcription, DNA-dependent (GO:0006355);; Biological Process: cell adhesion (GO:0007155);; Biological Process: response to light st…	--	Homeobox protein knotted-1-like 3 OS=Malus domestica PE=2 SV=1	PREDICTED: homeobox protein knotted-1-like 3-like [Cucumis sativus]
CL9017Contig1	p3	(TAT)5	15	301	316	CTCCTACAAAGCATGTGCTAC	55.25	21	AGCACAGAGAGATTGACAAGA	55.15	21	153	--	--	--	--	--	PREDICTED: uncharacterized protein LOC101213898 [Cucumis sativus]
CL9103Contig1	p2	(AG)8	16	29	45	TCGTAGTCAAGTTCAACAACC	55.38	21	AGTTCTTCAGTTGCTGTTGTG	55.63	21	155	[R]	General function prediction only	Cellular Component: plastid (GO:0009536);;	--	Tetratricopeptide repeat protein 5 OS=Homo sapiens GN=TTC5 PE=1 SV=2	PREDICTED: tetratricopeptide repeat protein 5-like [Cucumis sativus]
CL9115Contig1	p3	(GAA)6	18	301	319	AGCAAGCAAGTAATCTGGAG	54.87	20	AACCCGTTCAAGTTATCTCTC	55.06	21	152	--	--	Cellular Component: cytoplasm (GO:0005737);; Biological Process: fatty acid catabolic process (GO:0009062);; Cellular Component: intracellular membrane-bounded organelle (GO:0043231);; Biological Process: response to stimulus (GO:0050896);;	--	F-box/kelch-repeat protein SKIP30 OS=Arabidopsis thaliana GN=SKIP30 PE=1 SV=2	PREDICTED: F-box/kelch-repeat protein SKIP30-like [Cucumis sativus]
CL9151Contig1	p2	(TC)10	20	24	44	GCCGCATTTAGGAATTAG	53.53	18	GAAGGACTCCTACCATCACTT	54.88	21	137	--	--	Cellular Component: intracellular part (GO:0044424);;	--	Programmed cell death protein 2-like OS=Gallus gallus GN=PDCD2L PE=2 SV=1	PREDICTED: programmed cell death protein 2-like [Cucumis sativus]
CL9189Contig1	p3	(TTC)5	15	230	245	AGCAGGCTTTACCAGTACTTT	55.1	21	GGGATTCATACGAAGAACAA	55.13	20	136	[O]	Posttranslational modification, protein turnover, chaperones	Biological Process: metabolic process (GO:0008152);; Molecular Function: amino acid binding (GO:0016597);; Molecular Function: nucleotidyltransferase activity (GO:0016779);;	--	[Protein-PII] uridylyltransferase OS=Gluconobacter oxydans (strain 621H) GN=glnD PE=3 SV=1	PREDICTED: uncharacterized protein LOC101218687 [Cucumis sativus]
CL9216Contig1	p2	(AG)7	14	24	38	CTCCCCGAGCGACTTCAC	61.97	18	AAGTAAAACCTCACCAGAACC	54.98	21	153	--	--	Biological Process: response to dietary excess (GO:0002021);; Molecular Function: ATP transmembrane transporter activity (GO:0005347);; Cellular Component: mitochondrion (GO:0005739);; Cellular Component: mitochondrial inner membrane (GO:0005743);; Cellular Component: vacuolar membrane (GO:0005774);; Cellular Component: plasma membrane (GO:0005886);; Biological Process: glycolysis (GO:0006096);; …	--	Mitochondrial adenine nucleotide transporter ADNT1 OS=Arabidopsis thaliana GN=ADNT1 PE=2 SV=1	PREDICTED: mitochondrial substrate carrier family protein B-like [Cucumis sativus]
CL9253Contig1	p2	(AT)7	14	137	151	ACTTATGCGAAACAATCACC	55.24	20	CCTATCGACTGGTAGCACTG	55.97	20	163	[C]	Energy production and conversion	Cellular Component: acrosomal vesicle (GO:0001669);; Molecular Function: protein binding (GO:0005515);; Cellular Component: nucleus (GO:0005634);; Cellular Component: mitochondrial proton-transporting ATP synthase complex (GO:0005753);; Cellular Component: vacuolar membrane (GO:0005774);; Cellular Component: cytosol (GO:0005829);; Cellular Component: plasma membrane (GO:0005886);; Biological Proc…	K02150|1e-134|rcu:RCOM_1690700|vacuolar ATP synthase subunit E, putative	V-type proton ATPase subunit E OS=Gossypium hirsutum GN=VATE PE=2 SV=1	PREDICTED: V-type proton ATPase subunit E-like [Cucumis sativus]
CL9303Contig1	p3	(GAG)5	15	301	316	ACAGCTAATCCAGTCCCTAAC	55.1	21	TCCAGGTTATTACAGTAGTGCTC	55.37	23	159	--	--	Molecular Function: protein binding (GO:0005515);; Biological Process: anatomical structure morphogenesis (GO:0009653);; Molecular Function: transferase activity (GO:0016740);; Biological Process: cellular developmental process (GO:0048869);; Cellular Component: cell periphery (GO:0071944);;	--	Leucine-rich repeat extensin-like protein 3 OS=Arabidopsis thaliana GN=LRX3 PE=1 SV=1	hypothetical protein PRUPE_ppa008681mg [Prunus persica]
CL9303Contig1	p3	(GGC)6	18	540	558	GGAGTAACATACGACGAATTG	54.86	21	CCTCAAGGTAAGATTCGTATG	54.13	21	170	--	--	Molecular Function: protein binding (GO:0005515);; Biological Process: anatomical structure morphogenesis (GO:0009653);; Molecular Function: transferase activity (GO:0016740);; Biological Process: cellular developmental process (GO:0048869);; Cellular Component: cell periphery (GO:0071944);;	--	Leucine-rich repeat extensin-like protein 3 OS=Arabidopsis thaliana GN=LRX3 PE=1 SV=1	hypothetical protein PRUPE_ppa008681mg [Prunus persica]
CL9303Contig1	p3	(GAG)5	15	62	77	CAGGACGATCGAAATACG	55.03	18	CAATTCGTCGTATGTTACTCC	54.86	21	176	--	--	Molecular Function: protein binding (GO:0005515);; Biological Process: anatomical structure morphogenesis (GO:0009653);; Molecular Function: transferase activity (GO:0016740);; Biological Process: cellular developmental process (GO:0048869);; Cellular Component: cell periphery (GO:0071944);;	--	Leucine-rich repeat extensin-like protein 3 OS=Arabidopsis thaliana GN=LRX3 PE=1 SV=1	hypothetical protein PRUPE_ppa008681mg [Prunus persica]
CL9324Contig1	p3	(GAA)5	15	301	316	ACAGAGTCAGCAGCTCTCTTA	54.64	21	GAGAGGGGTAGGATTTTAATG	54.56	21	149	--	--	Biological Process: immune effector process (GO:0002252);; Molecular Function: protein binding (GO:0005515);; Cellular Component: nucleus (GO:0005634);; Biological Process: carbohydrate metabolic process (GO:0005975);; Biological Process: defense response (GO:0006952);; Biological Process: response to osmotic stress (GO:0006970);; Biological Process: multicellular organismal development (GO:00072…	--	Auxin-responsive protein IAA13 OS=Arabidopsis thaliana GN=IAA13 PE=1 SV=2	PREDICTED: auxin-responsive protein IAA13-like [Cucumis sativus]
CL9494Contig1	p2	(AT)6	12	301	313	GATCTTGAACAGCCATTGTT	55.19	20	GTACAACGAAACCACTCAGAC	54.77	21	188	[GER]	--	Cellular Component: plasma membrane (GO:0005886);; Biological Process: amino acid transport (GO:0006865);; Biological Process: Golgi to vacuole transport (GO:0006896);; Biological Process: response to abiotic stimulus (GO:0009628);; Cellular Component: plant-type vacuole membrane (GO:0009705);; Biological Process: unidimensional cell growth (GO:0009826);; Biological Process: secondary cell wall b…	--	WAT1-related protein At4g30420 OS=Arabidopsis thaliana GN=At4g30420 PE=3 SV=1	PREDICTED: auxin-induced protein 5NG4-like [Cucumis sativus]
CL9713Contig1	p3	(CTC)5	15	301	316	GTACTCTATGGGGCGTACAAT	55.8	21	CCTCTCAAACTCTCACACAAC	54.89	21	122	--	--	Cellular Component: endoplasmic reticulum (GO:0005783);; Cellular Component: Golgi apparatus (GO:0005794);; Biological Process: lipid metabolic process (GO:0006629);; Cellular Component: membrane (GO:0016020);; Molecular Function: oxidoreductase activity, acting on the CH-CH group of donors (GO:0016627);; Biological Process: cellular metabolic process (GO:0044237);;	--	Polyprenol reductase 2 OS=Arabidopsis thaliana GN=At2g16530 PE=1 SV=2	PREDICTED: polyprenol reductase 2-like [Cucumis sativus]
CL9735Contig1	p2	(AG)6	12	301	313	AATTAAGCACAGCAGTAGCAG	55.17	21	CGATTCGACTTATTCCACAT	55.17	20	121	[R]	General function prediction only	Molecular Function: nucleotide binding (GO:0000166);; Cellular Component: cytosol (GO:0005829);; Biological Process: metabolic process (GO:0008152);; Biological Process: cellular process (GO:0009987);; Biological Process: myo-inositol hexakisphosphate biosynthetic process (GO:0010264);; Molecular Function: oxidoreductase activity (GO:0016491);; Biological Process: oxidation-reduction process (GO:…	--	Uncharacterized oxidoreductase At4g09670 OS=Arabidopsis thaliana GN=At4g09670 PE=1 SV=1	PREDICTED: uncharacterized oxidoreductase At4g09670-like [Cucumis sativus]
CL9797Contig1	p3	(CTT)6	18	177	195	AGATCGTTCTTTCCTTTTCC	55.09	20	AGAAAGACTCCATAGCCTAGC	54.67	21	157	--	--	Cellular Component: cytoplasm (GO:0005737);;	--	UV radiation resistance-associated gene protein OS=Homo sapiens GN=UVRAG PE=1 SV=1	PREDICTED: UV radiation resistance-associated gene protein-like [Cucumis sativus]
CL9809Contig1	p2	(AG)6	12	301	313	GCGAGCTTCAGTATTGTCTC	55.26	20	AATGGTATCGACCTCTCTCTC	54.96	21	132	--	--	Cellular Component: Prp19 complex (GO:0000974);; Cellular Component: nucleus (GO:0005634);; Cellular Component: spliceosomal complex (GO:0005681);; Cellular Component: nucleolus (GO:0005730);; Biological Process: RNA splicing (GO:0008380);; Biological Process: somatic diversification of immunoglobulins (GO:0016445);; Molecular Function: enzyme binding (GO:0019899);; Biological Process: D-xylose m…	K12864|0.0|rcu:RCOM_0763720|hypothetical protein	Beta-catenin-like protein 1 OS=Bos taurus GN=CTNNBL1 PE=2 SV=3	PREDICTED: beta-catenin-like protein 1-like [Cucumis sativus]
CL9822Contig1	p3	(GCC)5	15	290	305	ACACCTCAAACCCTACACTCT	55.32	21	AGGAAGTCCTCAGACAAATCT	54.59	21	164	--	--	Cellular Component: mitochondrion (GO:0005739);; Biological Process: glycolysis (GO:0006096);; Biological Process: oligopeptide transport (GO:0006857);; Biological Process: aerobic respiration (GO:0009060);; Cellular Component: chloroplast (GO:0009507);; Cellular Component: membrane (GO:0016020);; Biological Process: response to cadmium ion (GO:0046686);;	--	--	PREDICTED: uncharacterized protein LOC101207862 [Cucumis sativus]
CL9822Contig1	p3	(GAT)5	15	301	316	CCTTGAGGTCGTTTCTAATGT	55.98	21	GTACTCTCACGAATGATTTGC	54.96	21	172	--	--	Cellular Component: mitochondrion (GO:0005739);; Biological Process: glycolysis (GO:0006096);; Biological Process: oligopeptide transport (GO:0006857);; Biological Process: aerobic respiration (GO:0009060);; Cellular Component: chloroplast (GO:0009507);; Cellular Component: membrane (GO:0016020);; Biological Process: response to cadmium ion (GO:0046686);;	--	--	PREDICTED: uncharacterized protein LOC101207862 [Cucumis sativus]
CL9900Contig1	p3	(GGA)5	15	301	316	GGCTCAATAATGCTCTTCTTC	55.85	21	CTCCCAATTCATCACACTTT	55.03	20	152	--	--	Molecular Function: sequence-specific DNA binding transcription factor activity (GO:0003700);; Molecular Function: protein binding (GO:0005515);; Cellular Component: nucleus (GO:0005634);; Cellular Component: cytosol (GO:0005829);; Biological Process: regulation of transcription, DNA-dependent (GO:0006355);; Biological Process: cell adhesion (GO:0007155);; Biological Process: response to light st…	--	Homeobox protein knotted-1-like 3 OS=Malus domestica PE=2 SV=1	PREDICTED: homeobox protein knotted-1-like 3-like [Cucumis sativus]
CL9999Contig1	p3	(ATT)5	15	301	316	TAGCTCATCGGCTGAGATTAC	57.23	21	GTTGTGTTATGTTCGCAATG	55.07	20	132	[P]	Inorganic ion transport and metabolism	Biological Process: response to hypoxia (GO:0001666);; Molecular Function: inositol-1,4-bisphosphate 1-phosphatase activity (GO:0004441);; Cellular Component: nucleus (GO:0005634);; Cellular Component: mitochondrion (GO:0005739);; Cellular Component: cytosol (GO:0005829);; Biological Process: sulfur compound metabolic process (GO:0006790);; Molecular Function: 3'(2'),5'-bisphosphate nucleotidase …	K01107|0.0|pop:POPTR_818252|hypothetical protein	SAL1 phosphatase OS=Arabidopsis thaliana GN=SAL1 PE=1 SV=1	PREDICTED: SAL1 phosphatase-like [Cucumis sativus]
CL10184Contig1	p3	(GAA)6	18	301	319	ACCAGAAAAGAAACAGAGGAG	55.26	21	CGTCGGTTTTACTACTGACAT	54.54	21	144	[S]	Function unknown	Molecular Function: nucleotide binding (GO:0000166);; Biological Process: polysaccharide biosynthetic process (GO:0000271);; Biological Process: response to molecule of bacterial origin (GO:0002237);; Biological Process: regionalization (GO:0003002);; Molecular Function: protein kinase activity (GO:0004672);; Molecular Function: protein serine/threonine kinase activity (GO:0004674);; Molecular Fu…	--	Receptor-like protein kinase HAIKU2 OS=Arabidopsis thaliana GN=IKU2 PE=1 SV=1	PREDICTED: receptor-like protein kinase HAIKU2-like [Cucumis sativus]
CL10205Contig1	p4	(AGAA)5	20	301	321	CTGTCTGTGTCACATCACAAT	54.25	21	ATATCAAGCAGAGCCTCAAA	55.2	20	158	--	--	--	--	--	PREDICTED: uncharacterized LOC101221366 [Cucumis sativus]
CL10282Contig1	p2	(AG)6	12	301	313	CAAGCAAGAACCAGATAGATG	55.15	21	CCCTTCCCCAATTTAGTATT	54.82	20	160	--	--	Biological Process: polysaccharide biosynthetic process (GO:0000271);; Cellular Component: nucleus (GO:0005634);; Cellular Component: endosome (GO:0005768);; Cellular Component: vacuolar membrane (GO:0005774);; Cellular Component: Golgi apparatus (GO:0005794);; Cellular Component: trans-Golgi network (GO:0005802);; Cellular Component: plasma membrane (GO:0005886);; Biological Process: response to…	--	Probable methyltransferase PMT3 OS=Arabidopsis thaliana GN=At4g14360 PE=1 SV=1	PREDICTED: probable methyltransferase PMT8-like [Cucumis sativus]
CL10293Contig1	p3	(TTA)6	18	179	197	TCCTGAACTCCTAATTTCACC	55.88	21	CTTGAGTCTGGAGCTAAAGTG	54.52	21	115	--	--	Biological Process: maltose metabolic process (GO:0000023);; Molecular Function: nucleotide binding (GO:0000166);; Cellular Component: fungal-type vacuole membrane (GO:0000329);; Biological Process: peptide pheromone export (GO:0000770);; Molecular Function: DNA binding (GO:0003677);; Molecular Function: sequence-specific DNA binding transcription factor activity (GO:0003700);; Molecular Function…	K05663|0.0|pop:POPTR_571941|ABC transporter family of the mitochondria family	ABC transporter B family member 25, mitochondrial OS=Arabidopsis thaliana GN=ABCB25 PE=1 SV=1	PREDICTED: ABC transporter B family member 25, mitochondrial-like [Cucumis sativus]
CL10336Contig1	p3	(AGA)6	18	301	319	TCAGAGCGAGAAATCAATCT	55.15	20	CAGACACTGCCTTCTTCTTC	55.14	20	179	--	--	Molecular Function: calcium ion binding (GO:0005509);; Molecular Function: protein binding (GO:0005515);; Cellular Component: mitochondrion (GO:0005739);; Cellular Component: mitochondrial inner membrane (GO:0005743);; Cellular Component: integral to membrane (GO:0016021);; Biological Process: cristae formation (GO:0042407);;	--	LETM1 and EF-hand domain-containing protein 1, mitochondrial OS=Gallus gallus GN=LETM1 PE=2 SV=1	LETM1 and EF-hand domain-containing protein 1 [Theobroma cacao]
CL10360Contig1	p3	(ATT)5	15	301	316	TCTGTCTATGGGATAAGTTGG	54.34	21	GGATTGGTGATTTGATTCTG	55.39	20	147	--	--	Cellular Component: endosome (GO:0005768);; Cellular Component: Golgi apparatus (GO:0005794);; Cellular Component: trans-Golgi network (GO:0005802);; Biological Process: microtubule nucleation (GO:0007020);; Biological Process: multicellular organismal development (GO:0007275);; Biological Process: arabinogalactan protein metabolic process (GO:0010405);; Cellular Component: endomembrane system (G…	--	Probable beta-1,3-galactosyltransferase 20 OS=Arabidopsis thaliana GN=B3GALT20 PE=2 SV=1	PREDICTED: probable beta-1,3-galactosyltransferase 20-like [Cucumis sativus]
CL10407Contig1	p2	(AG)7	14	301	315	CGACTCCCCTATCTAGATTTC	54.69	21	TATAAGCAGCTCCATTACCAC	54.72	21	159	[R]	General function prediction only	Molecular Function: transporter activity (GO:0005215);; Molecular Function: binding (GO:0005488);; Cellular Component: plasma membrane (GO:0005886);; Biological Process: transport (GO:0006810);; Cellular Component: chloroplast (GO:0009507);; Cellular Component: chloroplast envelope (GO:0009941);; Molecular Function: transferase activity, transferring phosphorus-containing groups (GO:0016772);; Bi…	--	Uncharacterized protein sll1770 OS=Synechocystis sp. (strain PCC 6803 / Kazusa) GN=sll1770 PE=3 SV=1	PREDICTED: uncharacterized protein sll1770-like [Cucumis sativus]
CL10407Contig1	p2	(AT)6	12	301	313	GGGTCCCATGTTTATATTTC	53.47	20	CCCATAAATGGGACTTGAT	54.74	19	202	[R]	General function prediction only	Molecular Function: transporter activity (GO:0005215);; Molecular Function: binding (GO:0005488);; Cellular Component: plasma membrane (GO:0005886);; Biological Process: transport (GO:0006810);; Cellular Component: chloroplast (GO:0009507);; Cellular Component: chloroplast envelope (GO:0009941);; Molecular Function: transferase activity, transferring phosphorus-containing groups (GO:0016772);; Bi…	--	Uncharacterized protein sll1770 OS=Synechocystis sp. (strain PCC 6803 / Kazusa) GN=sll1770 PE=3 SV=1	PREDICTED: uncharacterized protein sll1770-like [Cucumis sativus]
CL10462Contig1	p3	(GGA)6	18	301	319	ACTTTCCACTTCCCAAGTTT	55.37	20	ATCTTCTCTACCACCTCCTCA	55.46	21	166	--	--	Molecular Function: binding (GO:0005488);; Biological Process: cellular process (GO:0009987);; Cellular Component: intracellular organelle (GO:0043229);; Cellular Component: cell periphery (GO:0071944);;	--	Lysine-rich arabinogalactan protein 19 OS=Arabidopsis thaliana GN=AGP19 PE=2 SV=2	PREDICTED: uncharacterized protein LOC101209442 [Cucumis sativus]
CL10521Contig1	p2	(GA)7	14	301	315	GGAACTGGAGATAAAACTGCT	55.22	21	CCTCTTCAGAGAAACAACCTC	55.67	21	169	--	--	Cellular Component: kinetochore (GO:0000776);; Cellular Component: condensed chromosome, centromeric region (GO:0000779);; Molecular Function: motor activity (GO:0003774);; Cellular Component: plasma membrane (GO:0005886);; Biological Process: cellular component movement (GO:0006928);; Biological Process: chromosome segregation (GO:0007059);; Biological Process: mitosis (GO:0007067);; Biological …	--	Putative nuclear matrix constituent protein 1-like protein OS=Arabidopsis thaliana GN=At5g65770 PE=2 SV=1	PREDICTED: putative nuclear matrix constituent protein 1-like protein-like [Cucumis sativus]
CL10528Contig1	p2	(TA)5	10	165	175	CATTCATCTTGCATTTGGAG	56.71	20	GGTGGATCAAACTTGTGAGT	54.91	20	172	--	--	--	--	--	PREDICTED: uncharacterized protein LOC101209188 [Cucumis sativus]
CL10528Contig1	p2	(CT)6	12	301	313	GTTTGATCCACCAAAATAGC	54.72	20	CATGCGGCTAATAGAAGTTT	54.86	20	134	--	--	--	--	--	PREDICTED: uncharacterized protein LOC101209188 [Cucumis sativus]
CL10548Contig1	p2	(TC)7	14	59	73	ATCTCTGCTTAGAGCTCGATT	55.21	21	GTCTTCTTCTTCTCCCATGTT	55.01	21	170	[K]	Transcription	Molecular Function: RNA binding (GO:0003723);; Molecular Function: binding (GO:0005488);; Cellular Component: nucleus (GO:0005634);; Cellular Component: cytosol (GO:0005829);; Biological Process: chromatin assembly or disassembly (GO:0006333);; Biological Process: DNA-dependent transcription, initiation (GO:0006352);; Biological Process: DNA-dependent transcription, elongation (GO:0006354);; Biol…	K11292|0.0|vvi:100241331|hypothetical protein LOC100241331	Transcription elongation factor SPT6 OS=Homo sapiens GN=SUPT6H PE=1 SV=2	PREDICTED: transcription elongation factor SPT6-like [Cucumis sativus]
CL10548Contig1	p3	(ATA)7	21	301	322	CAATAGAAATGCCAGTAGTCG	55.2	21	GGAATTGCCATAGCTAGAATC	55.65	21	148	[K]	Transcription	Molecular Function: RNA binding (GO:0003723);; Molecular Function: binding (GO:0005488);; Cellular Component: nucleus (GO:0005634);; Cellular Component: cytosol (GO:0005829);; Biological Process: chromatin assembly or disassembly (GO:0006333);; Biological Process: DNA-dependent transcription, initiation (GO:0006352);; Biological Process: DNA-dependent transcription, elongation (GO:0006354);; Biol…	K11292|0.0|vvi:100241331|hypothetical protein LOC100241331	Transcription elongation factor SPT6 OS=Homo sapiens GN=SUPT6H PE=1 SV=2	PREDICTED: transcription elongation factor SPT6-like [Cucumis sativus]
CL10554Contig1	p2	(TC)6	12	115	127	CCATGGGAACTGGAAAATA	55.85	19	GGGAAAGATGAGAGAGAAAGA	55.23	21	164	[P]	Inorganic ion transport and metabolism	Biological Process: establishment of planar polarity (GO:0001736);; Biological Process: response to molecule of bacterial origin (GO:0002237);; Molecular Function: transporter activity (GO:0005215);; Molecular Function: protein binding (GO:0005515);; Biological Process: lipid transport (GO:0006869);; Biological Process: intra-Golgi vesicle-mediated transport (GO:0006891);; Biological Process: def…	K14513|0.0|vvi:100256742|hypothetical protein LOC100256742	Ethylene-insensitive protein 2 OS=Arabidopsis thaliana GN=EIN2 PE=1 SV=1	PREDICTED: ethylene-insensitive protein 2-like [Cucumis sativus]
CL10574Contig1	p2	(AG)6	12	301	313	CTCCGACATTTTTACTCACTG	55.07	21	ATCTCCTCTTTCCCTCTTCTT	55.34	21	172	--	--	Biological Process: microtubule cytoskeleton organization (GO:0000226);; Cellular Component: nucleus (GO:0005634);; Cellular Component: spindle (GO:0005819);; Cellular Component: microtubule (GO:0005874);; Biological Process: chromatin silencing (GO:0006342);; Biological Process: intracellular protein transport (GO:0006886);; Biological Process: spindle organization (GO:0007051);; Biological Proc…	--	Protein MOR1 OS=Arabidopsis thaliana GN=MOR1 PE=1 SV=1	PREDICTED: protein MOR1-like [Cucumis sativus]
CL10592Contig1	p2	(TC)10	20	301	321	GTACAAATCGAAGGTTCTGC	54.95	20	GGATTGTGAAGTGTTTAGGG	54.62	20	146	[R]	General function prediction only	Biological Process: alternative nuclear mRNA splicing, via spliceosome (GO:0000380);; Biological Process: nematode larval development (GO:0002119);; Molecular Function: mRNA binding (GO:0003729);; Molecular Function: protein kinase activity (GO:0004672);; Molecular Function: copper ion binding (GO:0005507);; Molecular Function: ATP binding (GO:0005524);; Cellular Component: cell wall (GO:0005618)…	--	U1 small nuclear ribonucleoprotein 70 kDa OS=Xenopus tropicalis GN=snrnp70 PE=2 SV=1	PREDICTED: uncharacterized protein LOC101222546 [Cucumis sativus]
CL10699Contig1	p2	(AT)8	16	301	317	GACACTGGACGAAGACATTTA	55.3	21	GAATGTCCCATACTTGCTGT	55.06	20	162	--	--	Molecular Function: ubiquitin-protein ligase activity (GO:0004842);; Molecular Function: protein binding (GO:0005515);; Cellular Component: nucleus (GO:0005634);; Biological Process: ubiquitin-dependent protein catabolic process (GO:0006511);; Biological Process: response to ethylene stimulus (GO:0009723);; Biological Process: response to auxin stimulus (GO:0009733);; Biological Process: negative…	--	EIN3-binding F-box protein 1 OS=Arabidopsis thaliana GN=EBF1 PE=1 SV=1	PREDICTED: EIN3-binding F-box protein 1-like [Cucumis sativus]
CL10730Contig1	p3	(TCA)5	15	301	316	CGTTTTCTTAGCTCCTGAAT	53.98	20	CCTGGCTCTGTAAATAGCTG	55.33	20	150	[L]	Replication, recombination and repair	Cellular Component: nuclear chromosome (GO:0000228);; Cellular Component: cytoplasmic mRNA processing body (GO:0000932);; Cellular Component: dense fibrillar component (GO:0001651);; Biological Process: long-chain fatty acid metabolic process (GO:0001676);; Biological Process: defense response to insect (GO:0002213);; Molecular Function: DNA binding (GO:0003677);; Molecular Function: DNA topoisom…	K03163|0.0|pop:POPTR_1069943|hypothetical protein	DNA topoisomerase 1 OS=Arabidopsis thaliana GN=TOP1 PE=1 SV=1	PREDICTED: DNA topoisomerase 1-like [Cucumis sativus]
CL10730Contig1	p2	(GA)6	12	301	313	GCTATTTACAGAGCCAGGAAT	55.34	21	ACGACACCATTAGGTTTCTCT	55.41	21	179	[L]	Replication, recombination and repair	Cellular Component: nuclear chromosome (GO:0000228);; Cellular Component: cytoplasmic mRNA processing body (GO:0000932);; Cellular Component: dense fibrillar component (GO:0001651);; Biological Process: long-chain fatty acid metabolic process (GO:0001676);; Biological Process: defense response to insect (GO:0002213);; Molecular Function: DNA binding (GO:0003677);; Molecular Function: DNA topoisom…	K03163|0.0|pop:POPTR_1069943|hypothetical protein	DNA topoisomerase 1 OS=Arabidopsis thaliana GN=TOP1 PE=1 SV=1	PREDICTED: DNA topoisomerase 1-like [Cucumis sativus]
CL10736Contig1	p3	(TGC)6	18	301	319	AAGTCGGGTATGAAGGATTAC	54.88	21	GACGAGTGATGTTGAGGTAGA	55.29	21	167	[R]	General function prediction only	Molecular Function: nucleotide binding (GO:0000166);; Cellular Component: chromatin (GO:0000785);; Molecular Function: nucleic acid binding (GO:0003676);; Molecular Function: single-stranded RNA binding (GO:0003727);; Biological Process: mRNA polyadenylation (GO:0006378);; Biological Process: RNA catabolic process (GO:0006401);; Biological Process: translation (GO:0006412);; Biological Process: n…	--	Flowering time control protein FPA OS=Arabidopsis thaliana GN=FPA PE=2 SV=2	PREDICTED: flowering time control protein FPA-like [Cucumis sativus]
CL10761Contig1	p3	(TCT)6	18	272	290	CCGTAGAAGAAAACGATTCAC	56.53	21	GAATTGGGATTTTGAGTGAG	54.67	20	150	[G]	Carbohydrate transport and metabolism	Biological Process: maltose metabolic process (GO:0000023);; Biological Process: polysaccharide catabolic process (GO:0000272);; Molecular Function: 1,4-alpha-glucan branching enzyme activity (GO:0003844);; Molecular Function: hydrolase activity, hydrolyzing O-glycosyl compounds (GO:0004553);; Cellular Component: cytosol (GO:0005829);; Biological Process: glycogen biosynthetic process (GO:0005978…	K00700|0.0|rcu:RCOM_0022940|starch branching enzyme II, putative (EC:2.4.1.18)	1,4-alpha-glucan-branching enzyme 2-1, chloroplastic/amyloplastic OS=Arabidopsis thaliana GN=SBE2.1 PE=1 SV=1	PREDICTED: 1,4-alpha-glucan-branching enzyme 2-2, chloroplastic/amyloplastic-like [Cucumis sativus]
CL10761Contig1	p3	(CTG)5	15	301	316	CGAATTCCTCTCTCTCTTTTC	54.99	21	CAGGAACAAGAACTTTCTCAG	54.31	21	154	[G]	Carbohydrate transport and metabolism	Biological Process: maltose metabolic process (GO:0000023);; Biological Process: polysaccharide catabolic process (GO:0000272);; Molecular Function: 1,4-alpha-glucan branching enzyme activity (GO:0003844);; Molecular Function: hydrolase activity, hydrolyzing O-glycosyl compounds (GO:0004553);; Cellular Component: cytosol (GO:0005829);; Biological Process: glycogen biosynthetic process (GO:0005978…	K00700|0.0|rcu:RCOM_0022940|starch branching enzyme II, putative (EC:2.4.1.18)	1,4-alpha-glucan-branching enzyme 2-1, chloroplastic/amyloplastic OS=Arabidopsis thaliana GN=SBE2.1 PE=1 SV=1	PREDICTED: 1,4-alpha-glucan-branching enzyme 2-2, chloroplastic/amyloplastic-like [Cucumis sativus]
CL10842Contig1	p2	(AT)8	16	40	56	AACAAAGTGTCTGAAGTCCA	53.12	20	CTTCTGCATCAGAAAACTCTC	54.37	21	136	[T]	Signal transduction mechanisms	Biological Process: two-component signal transduction system (phosphorelay) (GO:0000160);; Molecular Function: DNA binding (GO:0003677);; Molecular Function: sequence-specific DNA binding transcription factor activity (GO:0003700);; Molecular Function: protein binding (GO:0005515);; Cellular Component: nucleus (GO:0005634);; Cellular Component: mitochondrion (GO:0005739);; Biological Process: res…	--	Two-component response regulator-like APRR7 OS=Arabidopsis thaliana GN=APRR7 PE=2 SV=1	PREDICTED: two-component response regulator-like APRR7-like [Cucumis sativus]
CL10842Contig1	p2	(AT)10	20	241	261	CCACTGGCAATAAAGTTCA	54.67	19	CCCTTTAACAAGAAATGTGC	54.98	20	150	[T]	Signal transduction mechanisms	Biological Process: two-component signal transduction system (phosphorelay) (GO:0000160);; Molecular Function: DNA binding (GO:0003677);; Molecular Function: sequence-specific DNA binding transcription factor activity (GO:0003700);; Molecular Function: protein binding (GO:0005515);; Cellular Component: nucleus (GO:0005634);; Cellular Component: mitochondrion (GO:0005739);; Biological Process: res…	--	Two-component response regulator-like APRR7 OS=Arabidopsis thaliana GN=APRR7 PE=2 SV=1	PREDICTED: two-component response regulator-like APRR7-like [Cucumis sativus]
CL10877Contig1	p3	(GAA)7	21	301	322	AGAAACCAGAGTGTTTTCCAC	55.87	21	ATTCTCAGACCTCATTTCCAC	55.71	21	149	[Q]	Secondary metabolites biosynthesis, transport and catabolism	Molecular Function: beta-carotene 15,15'-monooxygenase activity (GO:0003834);; Molecular Function: protein binding (GO:0005515);; Biological Process: response to cold (GO:0009409);; Biological Process: response to water deprivation (GO:0009414);; Cellular Component: chloroplast thylakoid membrane (GO:0009535);; Cellular Component: chloroplast stroma (GO:0009570);; Biological Process: abscisic aci…	K09840|0.0|vvi:100267016|hypothetical protein LOC100267016	9-cis-epoxycarotenoid dioxygenase NCED1, chloroplastic OS=Phaseolus vulgaris GN=NCED1 PE=2 SV=1	9-cis-epoxycarotenoid dioxygenase [Momordica charantia]
CL10877Contig1	p2	(AG)6	12	301	313	GAGCAGTAGTAGAAGCCATGA	54.88	21	CCGAAATCCTTAACGAAAGT	56.04	20	153	[Q]	Secondary metabolites biosynthesis, transport and catabolism	Molecular Function: beta-carotene 15,15'-monooxygenase activity (GO:0003834);; Molecular Function: protein binding (GO:0005515);; Biological Process: response to cold (GO:0009409);; Biological Process: response to water deprivation (GO:0009414);; Cellular Component: chloroplast thylakoid membrane (GO:0009535);; Cellular Component: chloroplast stroma (GO:0009570);; Biological Process: abscisic aci…	K09840|0.0|vvi:100267016|hypothetical protein LOC100267016	9-cis-epoxycarotenoid dioxygenase NCED1, chloroplastic OS=Phaseolus vulgaris GN=NCED1 PE=2 SV=1	9-cis-epoxycarotenoid dioxygenase [Momordica charantia]
CL10934Contig1	p2	(AT)9	18	274	292	CTGGAAGCCAAGAAATAATG	55.07	20	CTCTGTTGGTTGTTCTTGTTC	54.92	21	145	--	--	Molecular Function: ubiquitin-protein ligase activity (GO:0004842);; Cellular Component: nucleus (GO:0005634);; Cellular Component: organelle membrane (GO:0031090);; Molecular Function: ubiquitin conjugating enzyme binding (GO:0031624);; Cellular Component: cytoplasmic part (GO:0044444);; Cellular Component: intracellular organelle part (GO:0044446);; Biological Process: negative regulation of or…	--	E3 ubiquitin ligase BIG BROTHER OS=Arabidopsis thaliana GN=BB PE=1 SV=1	PREDICTED: uncharacterized protein LOC101205883 [Cucumis sativus]
CL10951Contig1	p3	(AAG)5	15	301	316	GAAGAAATAGCTCATGGCTTAG	55.25	22	ACCACCATTCCTCTTTCTCTA	55.47	21	164	[GC]	--	Biological Process: flavonoid metabolic process (GO:0009812);; Molecular Function: transferase activity, transferring glycosyl groups (GO:0016757);; Molecular Function: UDP-glucosyltransferase activity (GO:0035251);; Cellular Component: cytoplasmic part (GO:0044444);; Biological Process: response to stimulus (GO:0050896);;	--	Cyanidin-3-O-glucoside 2-O-glucuronosyltransferase OS=Bellis perennis GN=UGAT PE=1 SV=1	PREDICTED: cyanidin-3-O-glucoside 2-O-glucuronosyltransferase-like [Cucumis sativus]
CL11006Contig1	p3	(AGA)5	15	301	316	GGAAGAAGAGGGACTGTTTTA	55.2	21	CCGTTAACAAAACCAGCAT	56.19	19	183	[Q]	Secondary metabolites biosynthesis, transport and catabolism	Molecular Function: monooxygenase activity (GO:0004497);; Molecular Function: binding (GO:0005488);; Molecular Function: iron ion binding (GO:0005506);; Biological Process: terpenoid metabolic process (GO:0006721);; Molecular Function: electron carrier activity (GO:0009055);; Biological Process: response to UV (GO:0009411);; Biological Process: response to auxin stimulus (GO:0009733);; Biological…	--	Isoflavone 2&apos;-hydroxylase OS=Glycyrrhiza echinata GN=CYP81E1 PE=1 SV=2	PREDICTED: isoflavone 2&apos;-hydroxylase-like [Cucumis sativus]
CL11048Contig1	p3	(TGA)5	15	301	316	GCAGCAGCTAGTTTTGTGTAT	55	21	GGGGGATGGTGTCTACATTA	57.17	20	151	[I]	Lipid transport and metabolism	Biological Process: kidney development (GO:0001822);; Biological Process: liver development (GO:0001889);; Molecular Function: hydroxymethylglutaryl-CoA synthase activity (GO:0004421);; Cellular Component: nucleolus (GO:0005730);; Cellular Component: mitochondrial matrix (GO:0005759);; Cellular Component: cytosol (GO:0005829);; Cellular Component: plasma membrane (GO:0005886);; Biological Process…	K01641|0.0|rcu:RCOM_1683050|hydroxymethylglutaryl-CoA synthase, putative (EC:2.3.3.10)	Hydroxymethylglutaryl-CoA synthase OS=Arabidopsis thaliana GN=HMGS PE=1 SV=2	hydroxymethylglutaryl-CoA synthase [Siraitia grosvenorii]
CL11068Contig1	p6	(CGATTC)5	30	47	77	GTCCACAATCAACAACCTTT	54.94	20	GGGATAGAAACCCTAGCTAAA	54.51	21	126	[E]	Amino acid transport and metabolism	Biological Process: sulfur amino acid catabolic process (GO:0000098);; Biological Process: selenium compound metabolic process (GO:0001887);; Molecular Function: cystathionine gamma-synthase activity (GO:0003962);; Molecular Function: cystathionine gamma-lyase activity (GO:0004123);; Molecular Function: protein binding (GO:0005515);; Cellular Component: nucleus (GO:0005634);; Cellular Component: …	K01739|0.0|ath:AT3G01120|MTO1	Cystathionine gamma-synthase, chloroplastic OS=Arabidopsis thaliana GN=CGS1 PE=2 SV=3	PREDICTED: cystathionine gamma-synthase, chloroplastic-like [Cucumis sativus]
CL11068Contig1	p3	(GCG)5	15	301	316	ACTGTAGCAATATCGGAGTTG	54.61	21	AACGGAAGTCTTCAGAACCT	55.52	20	176	[E]	Amino acid transport and metabolism	Biological Process: sulfur amino acid catabolic process (GO:0000098);; Biological Process: selenium compound metabolic process (GO:0001887);; Molecular Function: cystathionine gamma-synthase activity (GO:0003962);; Molecular Function: cystathionine gamma-lyase activity (GO:0004123);; Molecular Function: protein binding (GO:0005515);; Cellular Component: nucleus (GO:0005634);; Cellular Component: …	K01739|0.0|ath:AT3G01120|MTO1	Cystathionine gamma-synthase, chloroplastic OS=Arabidopsis thaliana GN=CGS1 PE=2 SV=3	PREDICTED: cystathionine gamma-synthase, chloroplastic-like [Cucumis sativus]
CL11110Contig1	p2	(GA)6	12	301	313	GATTGTGAGAGAGCGAGTATC	54.13	21	ACTCTTACACCGATTCTACCC	54.94	21	155	[E]	Amino acid transport and metabolism	Molecular Function: aminopeptidase activity (GO:0004177);; Molecular Function: leukotriene-A4 hydrolase activity (GO:0004463);; Cellular Component: nucleus (GO:0005634);; Cellular Component: cytoplasm (GO:0005737);; Cellular Component: cytosol (GO:0005829);; Biological Process: DNA replication (GO:0006260);; Biological Process: DNA methylation (GO:0006306);; Biological Process: proteolysis (GO:00…	--	Leukotriene A-4 hydrolase homolog OS=Sclerotinia sclerotiorum (strain ATCC 18683 / 1980 / Ss-1) GN=SS1G_05513 PE=3 SV=1	PREDICTED: leukotriene A-4 hydrolase homolog [Cucumis sativus]
CL11116Contig1	p3	(GGT)6	18	301	319	GGAAGTTATGGAAGTTCAGGT	54.9	21	ATGGTATCGACTACTCCCAGT	55.21	21	147	[R]	General function prediction only	Molecular Function: nucleotide binding (GO:0000166);; Cellular Component: chromosome, telomeric region (GO:0000781);; Biological Process: epithelial to mesenchymal transition (GO:0001837);; Biological Process: morphogenesis of an epithelium (GO:0002009);; Biological Process: nematode larval development (GO:0002119);; Molecular Function: sequence-specific DNA binding transcription factor activity …	--	Heterogeneous nuclear ribonucleoprotein 1 OS=Arabidopsis thaliana GN=RNP1 PE=1 SV=1	PREDICTED: nuclear polyadenylated RNA-binding protein 4-like [Cucumis sativus]
CL11128Contig1	p3	(TCT)6	18	233	251	CTTTTCTTGCAGAGCAGAAT	54.99	20	GCAGCTTCAAGATCACTGTAA	55.8	21	147	[RTKL]	--	Biological Process: alternative nuclear mRNA splicing, via spliceosome (GO:0000380);; Molecular Function: double-stranded DNA binding (GO:0003690);; Molecular Function: single-stranded DNA binding (GO:0003697);; Molecular Function: mRNA binding (GO:0003729);; Molecular Function: protein kinase activity (GO:0004672);; Molecular Function: protein serine/threonine kinase activity (GO:0004674);; Mole…	--	Serine/threonine-protein kinase-like protein At3g51990 OS=Arabidopsis thaliana GN=At3g51990 PE=2 SV=1	PREDICTED: serine/threonine-protein kinase-like protein At3g51990-like [Cucumis sativus]
CL11195Contig1	p2	(CT)9	18	84	102	AAAACCACTTCACCAGACAC	55	20	CCGACATTGATGTAAAATCC	55.43	20	145	[M]	Cell wall/membrane/envelope biogenesis	Cellular Component: mitochondrion (GO:0005739);; Cellular Component: endosome (GO:0005768);; Cellular Component: Golgi apparatus (GO:0005794);; Cellular Component: trans-Golgi network (GO:0005802);; Biological Process: pollen development (GO:0009555);; Biological Process: pollen tube growth (GO:0009860);; Biological Process: tissue development (GO:0009888);; Biological Process: homogalacturonan b…	K13648|0.0|rcu:RCOM_1194050|Glycosyltransferase QUASIMODO1, putative	Probable galacturonosyltransferase 15 OS=Arabidopsis thaliana GN=GAUT15 PE=2 SV=1	PREDICTED: probable galacturonosyltransferase 15-like [Cucumis sativus]
CL11205Contig1	p2	(GA)7	14	301	315	GCGAAATTATTCACCAGAAC	54.88	20	TTGCTAACATGAACACTCTC	51.18	20	134	--	--	--	--	--	PREDICTED: uncharacterized protein LOC101218916 [Cucumis sativus]
CL11268Contig1	p2	(AG)7	14	10	26	CATCAATGGCTTCTGTACTGT	55.34	21	CTTTGTCTCAACCTGACTGAC	54.89	21	160	[MG]	--	Molecular Function: nucleotide binding (GO:0000166);; Molecular Function: protein binding (GO:0005515);; Cellular Component: endosome (GO:0005768);; Cellular Component: Golgi apparatus (GO:0005794);; Cellular Component: trans-Golgi network (GO:0005802);; Biological Process: carbohydrate metabolic process (GO:0005975);; Biological Process: tryptophan catabolic process (GO:0006569);; Biological Pro…	K08679|0.0|rcu:RCOM_0782170|UDP-glucuronate 5-epimerase, putative (EC:5.1.3.12)	UDP-glucuronate 4-epimerase 1 OS=Arabidopsis thaliana GN=GAE1 PE=1 SV=1	PREDICTED: UDP-glucuronate 4-epimerase 1-like [Cucumis sativus]
CL11286Contig1	p3	(AGA)5	15	301	316	CCATTACAAAATCCTGAAGC	54.9	20	CTTCTATAAAAACCCCACCT	52.7	20	180	--	--	Cellular Component: mitochondrion (GO:0005739);; Biological Process: carbohydrate metabolic process (GO:0005975);; Biological Process: phosphate-containing compound metabolic process (GO:0006796);; Cellular Component: plastid (GO:0009536);; Biological Process: plastid organization (GO:0009657);; Biological Process: gene expression (GO:0010467);; Biological Process: RNA metabolic process (GO:00160…	--	Pentatricopeptide repeat-containing protein At5g02830, chloroplastic OS=Arabidopsis thaliana GN=At5g02830 PE=2 SV=3	PREDICTED: pentatricopeptide repeat-containing protein At5g02830, chloroplastic-like [Cucumis sativus]
CL11386Contig1	p3	(TTG)5	15	301	316	GAGCCCTACCTAACTTTTTGT	54.47	21	CGCCATAGATCAATCAAATC	55.67	20	143	[R]	General function prediction only	Cellular Component: cytoplasm (GO:0005737);; Biological Process: metabolic process (GO:0008152);; Molecular Function: hydrolase activity (GO:0016787);;	--	Uncharacterized hydrolase YugF OS=Bacillus subtilis (strain 168) GN=yugF PE=3 SV=1	PREDICTED: uncharacterized protein LOC101203213 [Cucumis sativus]
CL11452Contig1	p2	(AG)10	20	301	321	CAGACCTTCCATTTCTCAAA	55.35	20	TCATAAAGGGGAAGGTATCTC	54.93	21	156	--	--	Molecular Function: RNA binding (GO:0003723);; Molecular Function: endoribonuclease activity (GO:0004521);; Cellular Component: extracellular region (GO:0005576);; Cellular Component: nucleus (GO:0005634);; Cellular Component: cytoplasm (GO:0005737);; Biological Process: proteolysis (GO:0006508);; Biological Process: female pregnancy (GO:0007565);; Molecular Function: serine-type peptidase activi…	K14648|0.0|rcu:RCOM_0856150|Placental protein 11 precursor, putative	Poly(U)-specific endoribonuclease-B OS=Danio rerio GN=endoub PE=2 SV=1	PREDICTED: poly(U)-specific endoribonuclease-B-like [Cucumis sativus]
CL11496Contig1	p2	(TC)7	14	37	51	AACTTCTCCAACCCAAATTC	55.7	20	TAGAAGGGTCTTCTCCAAGAG	55.35	21	102	[Q]	Secondary metabolites biosynthesis, transport and catabolism	Molecular Function: iron ion binding (GO:0005506);; Cellular Component: extracellular region (GO:0005576);; Cellular Component: mitochondrion (GO:0005739);; Cellular Component: vacuolar membrane (GO:0005774);; Cellular Component: endoplasmic reticulum (GO:0005783);; Cellular Component: Golgi apparatus (GO:0005794);; Cellular Component: plasma membrane (GO:0005886);; Molecular Function: electron c…	K00487|0.0|pop:POPTR_823837|C4H2, CYP73A42	Trans-cinnamate 4-monooxygenase OS=Populus kitakamiensis GN=CYP73A16 PE=2 SV=1	trans-cinnamate 4-hydroxylase [Populus tremuloides]
CL11557Contig1	p3	(AGA)6	18	301	319	GAGACCGAGTAAAACCAAGTT	55.14	21	ACAACTCAGATTCACTTACCG	54.46	21	149	[F]	Nucleotide transport and metabolism	Molecular Function: uracil binding (GO:0002058);; Molecular Function: NADH dehydrogenase activity (GO:0003954);; Molecular Function: dihydroorotate oxidase activity (GO:0004158);; Cellular Component: cytosol (GO:0005829);; Cellular Component: plasma membrane (GO:0005886);; Biological Process: purine nucleobase catabolic process (GO:0006145);; Biological Process: 'de novo' pyrimidine nucleobase bi…	K00207|0.0|rcu:RCOM_0084140|dihydroorotate dehydrogenase, putative (EC:1.3.1.2)	NAD-dependent dihydropyrimidine dehydrogenase subunit PreA OS=Salmonella typhimurium (strain LT2 / SGSC1412 / ATCC 700720) GN=preA PE=3 SV=1	dihydroorotate dehydrogenase, putative [Ricinus communis]
CL11645Contig1	p2	(TC)7	14	301	315	GAAGTCACGATGTCTCTTTGA	55.42	21	GGATATAGCTGATCCAAGTGTT	55.04	22	145	[I]	Lipid transport and metabolism	Biological Process: positive regulation of cytokine production (GO:0001819);; Molecular Function: 1-acylglycerol-3-phosphate O-acyltransferase activity (GO:0003841);; Cellular Component: endoplasmic reticulum (GO:0005783);; Biological Process: unsaturated fatty acid biosynthetic process (GO:0006636);; Biological Process: phosphatidic acid biosynthetic process (GO:0006654);; Biological Process: ph…	K00655|1e-158|vvi:100248458|hypothetical protein LOC100248458	1-acyl-sn-glycerol-3-phosphate acyltransferase 1, chloroplastic OS=Brassica napus GN=LPAT1 PE=2 SV=1	PREDICTED: 1-acyl-sn-glycerol-3-phosphate acyltransferase 1, chloroplastic-like [Cucumis sativus]
CL11780Contig1	p2	(AG)6	12	301	313	GGGTTTCTTTGGAACTTCA	55.15	19	AAGCCTAAGACCCCAAAAC	55.88	19	140	[GEPR]	--	Molecular Function: galactose transmembrane transporter activity (GO:0005354);; Molecular Function: glucose transmembrane transporter activity (GO:0005355);; Molecular Function: myo-inositol transmembrane transporter activity (GO:0005365);; Molecular Function: myo-inositol:hydrogen symporter activity (GO:0005366);; Cellular Component: plasma membrane (GO:0005886);; Cellular Component: integral to…	--	Polyol transporter 5 OS=Arabidopsis thaliana GN=PLT5 PE=1 SV=2	PREDICTED: LOW QUALITY PROTEIN: polyol transporter 5-like [Cucumis sativus]
CL11891Contig1	p2	(CT)9	18	58	76	AAAGGCTCAGATTTGACAGA	55.07	20	GGCCTTCTCAACAAAGTTTA	54.69	20	143	--	--	Molecular Function: ubiquitin-protein ligase activity (GO:0004842);; Molecular Function: protein binding (GO:0005515);; Cellular Component: nucleus (GO:0005634);; Cellular Component: cytosol (GO:0005829);; Biological Process: amino acid transport (GO:0006865);; Molecular Function: zinc ion binding (GO:0008270);; Biological Process: negative regulation of abscisic acid mediated signaling pathway (…	K11982|1e-155|pop:POPTR_652517|hypothetical protein	E3 ubiquitin-protein ligase RING1-like OS=Arabidopsis thaliana GN=At3g19950 PE=2 SV=1	PREDICTED: E3 ubiquitin-protein ligase RING1-like isoform 1 [Cucumis sativus]
CL11947Contig1	p2	(GA)6	12	301	313	ACAAAAATCACCCTGAACTG	55.12	20	CCTCAAACCCTTCTCTTGATA	56.04	21	141	[J]	Translation, ribosomal structure and biogenesis	Molecular Function: amidase activity (GO:0004040);; Molecular Function: carbon-nitrogen ligase activity, with glutamine as amido-N-donor (GO:0016884);;	--	Putative amidase C869.01 OS=Schizosaccharomyces pombe (strain 972 / ATCC 24843) GN=SPAC869.01 PE=3 SV=1	PREDICTED: putative amidase C869.01-like [Cucumis sativus]
CL12004Contig1	p2	(TA)8	16	301	317	AACTCAGGAAGGATTATGAGC	55.14	21	CCCCCTCTCTCTCTACTATCA	55.15	21	168	--	--	Cellular Component: endosome (GO:0005768);; Cellular Component: Golgi apparatus (GO:0005794);; Cellular Component: trans-Golgi network (GO:0005802);; Biological Process: methylation-dependent chromatin silencing (GO:0006346);; Biological Process: protein glycosylation (GO:0006486);; Molecular Function: galactosyltransferase activity (GO:0008378);; Biological Process: glycoprotein biosynthetic pro…	--	Probable beta-1,3-galactosyltransferase 2 OS=Arabidopsis thaliana GN=B3GALT2 PE=2 SV=1	PREDICTED: probable beta-1,3-galactosyltransferase 2-like [Cucumis sativus]
CL12420Contig1	p3	(TGG)5	15	301	316	CTCATGACAAACAAATCAGC	54.17	20	TGTTCAAATCGTCATACGTC	54.49	20	162	[KAD]	--	Molecular Function: DNA binding (GO:0003677);; Molecular Function: sequence-specific DNA binding transcription factor activity (GO:0003700);; Molecular Function: binding (GO:0005488);; Cellular Component: nucleus (GO:0005634);; Biological Process: polyamine catabolic process (GO:0006598);; Biological Process: oligopeptide transport (GO:0006857);; Biological Process: response to water deprivation …	K09422|1e-121|pop:POPTR_663179|MYB053	Myb-related protein 306 OS=Antirrhinum majus GN=MYB306 PE=2 SV=1	Myb domain protein 60 [Theobroma cacao]
CL12844Contig1	p3	(GAA)7	21	301	322	AGAATCAAGTGGGAAAAAGG	55.86	20	ATCCTGCCACTACCAATACTT	55.37	21	151	--	--	Biological Process: polysaccharide biosynthetic process (GO:0000271);; Cellular Component: cell wall (GO:0005618);; Cellular Component: nucleus (GO:0005634);; Cellular Component: mitochondrion (GO:0005739);; Cellular Component: plasma membrane (GO:0005886);; Biological Process: pattern specification process (GO:0007389);; Biological Process: multidimensional cell growth (GO:0009825);; Biological …	--	Formin-like protein 1 OS=Arabidopsis thaliana GN=FH1 PE=1 SV=1	PREDICTED: uncharacterized LOC101211678 [Cucumis sativus]
CL13204Contig1	p3	(GAA)5	15	301	316	GTGGAGAAGGGAAAGATTAAG	54.74	21	CATCATAGCTCTCCATCTCTG	55.05	21	241	--	--	Molecular Function: DNA binding (GO:0003677);; Molecular Function: sequence-specific DNA binding transcription factor activity (GO:0003700);; Molecular Function: protein binding (GO:0005515);; Cellular Component: nucleus (GO:0005634);; Biological Process: transcription, DNA-dependent (GO:0006351);; Biological Process: protein folding (GO:0006457);; Biological Process: response to water deprivatio…	--	Dehydration-responsive element-binding protein 2B OS=Oryza sativa subsp. japonica GN=DREB2B PE=2 SV=2	PREDICTED: uncharacterized protein LOC101215862 [Cucumis sativus]
CL13280Contig1	p2	(AT)7	14	114	128	GCCGAGTCATAAAATACCTTC	55.58	21	GTAAAGGCTTTCTGGAGTAGG	55	21	171	[MG]	--	Molecular Function: nucleotide binding (GO:0000166);; Biological Process: alternative nuclear mRNA splicing, via spliceosome (GO:0000380);; Molecular Function: double-stranded DNA binding (GO:0003690);; Molecular Function: single-stranded DNA binding (GO:0003697);; Molecular Function: mRNA binding (GO:0003729);; Molecular Function: protein kinase activity (GO:0004672);; Molecular Function: calmod…	--	Cinnamoyl-CoA reductase 1 OS=Arabidopsis thaliana GN=CCR1 PE=1 SV=1	PREDICTED: tetraketide alpha-pyrone reductase 1-like [Cucumis sativus]
CL13301Contig1	p2	(AG)6	12	108	120	TCACAGAAGAGAGAGAAACCA	55.13	21	GTCACTGAACCACTTCACTTT	54.29	21	122	[G]	Carbohydrate transport and metabolism	Molecular Function: RNA binding transcription antitermination factor activity (GO:0001072);; Molecular Function: DNA binding (GO:0003677);; Molecular Function: double-stranded DNA binding (GO:0003690);; Molecular Function: single-stranded DNA binding (GO:0003697);; Molecular Function: mRNA binding (GO:0003729);; Molecular Function: copper ion binding (GO:0005507);; Molecular Function: protein bin…	--	Glycine-rich protein 2 OS=Nicotiana sylvestris GN=GRP-2 PE=1 SV=1	predicted protein [Populus trichocarpa]
CL13301Contig1	p3	(GTG)6	18	301	319	GTGGTTGTTACAGCTGTGGT	56.05	20	AAAACAAAACACCCCCTAAC	55.65	20	141	[G]	Carbohydrate transport and metabolism	Molecular Function: RNA binding transcription antitermination factor activity (GO:0001072);; Molecular Function: DNA binding (GO:0003677);; Molecular Function: double-stranded DNA binding (GO:0003690);; Molecular Function: single-stranded DNA binding (GO:0003697);; Molecular Function: mRNA binding (GO:0003729);; Molecular Function: copper ion binding (GO:0005507);; Molecular Function: protein bin…	--	Glycine-rich protein 2 OS=Nicotiana sylvestris GN=GRP-2 PE=1 SV=1	predicted protein [Populus trichocarpa]
CL13340Contig1	p3	(TTC)5	15	301	316	GAACAAGCAGCTATTTACGAC	54.51	21	AGCACCACAGCTGTAATAAAC	54.68	21	165	--	--	Cellular Component: nucleus (GO:0005634);; Cellular Component: plasma membrane (GO:0005886);;	--	Uncharacterized protein At4g08330, chloroplastic OS=Arabidopsis thaliana GN=At4g08330 PE=1 SV=1	PREDICTED: uncharacterized protein At4g08330, chloroplastic-like [Cucumis sativus]
CL13370Contig1	p2	(TC)6	12	301	313	GTGCCTTTTTGCTATGTTGT	55.48	20	ATTCAGTTTCAGGCTCTGTCT	55.7	21	144	[J]	Translation, ribosomal structure and biogenesis	Biological Process: RNA methylation (GO:0001510);; Molecular Function: RNA binding (GO:0003723);; Cellular Component: cytoplasm (GO:0005737);; Biological Process: RNA processing (GO:0006396);; Biological Process: fatty acid beta-oxidation (GO:0006635);; Molecular Function: RNA methyltransferase activity (GO:0008173);; Biological Process: protein import into peroxisome matrix (GO:0016558);; Biolog…	--	tRNA (guanosine(18)-2&apos;-O)-methyltransferase OS=Shigella flexneri GN=trmH PE=3 SV=1	PREDICTED: putative TrmH family tRNA/rRNA methyltransferase-like [Cucumis sativus]
CL13632Contig1	p3	(ACA)5	15	110	125	GGTTTTACAAACTCAGAGACC	53.1	21	GGAATTAAGTTGTCGAGAGAAG	54.98	22	164	--	--	--	--	--	PREDICTED: uncharacterized protein LOC101204894 [Cucumis sativus]
CL13637Contig1	p2	(TC)6	12	40	52	CTTTCTTCACCGATTCTTTG	55.1	20	CAATGATCTTGAGCAGATGTC	55.82	21	151	--	--	Molecular Function: ubiquitin-protein ligase activity (GO:0004842);; Molecular Function: protein binding (GO:0005515);; Cellular Component: nucleus (GO:0005634);; Molecular Function: zinc ion binding (GO:0008270);; Cellular Component: chloroplast (GO:0009507);; Biological Process: response to salt stress (GO:0009651);; Biological Process: abscisic acid metabolic process (GO:0009687);; Biological …	--	Probable E3 ubiquitin-protein ligase RHA2B OS=Arabidopsis thaliana GN=RHA2B PE=1 SV=2	PREDICTED: E3 ubiquitin-protein ligase RHA1B-like isoform 1 [Cucumis sativus]
CL13827Contig1	p2	(AG)6	12	301	313	CATGGAAACAGAGATTAGCTG	55.15	21	GAACAACGATTCCCATTCT	54.92	19	152	--	--	Biological Process: maltose metabolic process (GO:0000023);; Cellular Component: mitochondrion (GO:0005739);; Cellular Component: chloroplast thylakoid membrane (GO:0009535);; Cellular Component: chloroplast envelope (GO:0009941);; Biological Process: leaf morphogenesis (GO:0009965);; Biological Process: photosystem II assembly (GO:0010207);; Biological Process: starch biosynthetic process (GO:00…	--	Thylakoid membrane protein slr0575 OS=Synechocystis sp. (strain PCC 6803 / Kazusa) GN=slr0575 PE=4 SV=1	PREDICTED: thylakoid membrane protein slr0575-like [Cucumis sativus]
CL14017Contig1	p6	(GGGGAT)5	30	301	331	CAACCCTTCTCTCATTTTCA	55.35	20	ATTCTCATACCCATCTCCATC	55.43	21	132	--	--	Biological Process: cellular process (GO:0009987);;	--	Uncharacterized histidine-rich protein DDB_G0274557 OS=Dictyostelium discoideum GN=DDB_G0274557 PE=4 SV=1	PREDICTED: uncharacterized LOC101222261 [Cucumis sativus]
CL14083Contig1	p3	(TCT)5	15	301	316	AGACCTACGAACATCATCATC	54.09	21	GTTCGTAAACTTCAAGCTGAG	54.54	21	147	--	--	Cellular Component: intracellular membrane-bounded organelle (GO:0043231);;	--	--	PREDICTED: uncharacterized protein LOC101207471 [Cucumis sativus]
CL14086Contig1	p2	(AT)6	12	301	313	GCTTGAAGAAAAGACAAGGA	54.79	20	CCCATCTGAAGAATTAGAGGT	54.99	21	174	[A]	RNA processing and modification	Biological Process: activation of MAPKK activity (GO:0000186);; Biological Process: polysaccharide biosynthetic process (GO:0000271);; Biological Process: regionalization (GO:0003002);; Molecular Function: protein kinase activity (GO:0004672);; Molecular Function: MAP kinase kinase kinase activity (GO:0004709);; Molecular Function: protein binding (GO:0005515);; Molecular Function: ATP binding (G…	--	Receptor-like protein kinase HSL1 OS=Arabidopsis thaliana GN=HSL1 PE=2 SV=1	PREDICTED: receptor-like protein kinase HSL1-like [Cucumis sativus]
CL14228Contig1	p3	(AGC)5	15	301	316	CAGGTTTATCATCTTCTGGACT	55.08	22	GTTTATGACACGAGTGTTTGG	55.68	21	155	--	--	Molecular Function: structural constituent of ribosome (GO:0003735);; Cellular Component: mitochondrial ribosome (GO:0005761);; Biological Process: DNA-dependent transcription, elongation (GO:0006354);; Biological Process: translation (GO:0006412);; Cellular Component: ribonucleoprotein complex (GO:0030529);; Cellular Component: intracellular organelle (GO:0043229);; Cellular Component: cytoplasm…	--	39S ribosomal protein L47, mitochondrial OS=Mus musculus GN=Mrpl47 PE=2 SV=2	PREDICTED: 39S ribosomal protein L47, mitochondrial-like [Cucumis sativus]
CL14549Contig1	p3	(CTT)6	18	203	221	GGAGTCGTATTGGGTTTCTAT	54.88	21	CATCCATTAATAGAGGAGAGGA	55.11	22	150	[K]	Transcription	Molecular Function: DNA binding (GO:0003677);; Molecular Function: sequence-specific DNA binding transcription factor activity (GO:0003700);; Cellular Component: nucleus (GO:0005634);; Biological Process: regulation of transcription, DNA-dependent (GO:0006355);; Biological Process: response to stress (GO:0006950);; Biological Process: signal transduction (GO:0007165);; Biological Process: asymmet…	--	Heat stress transcription factor B-3 OS=Arabidopsis thaliana GN=HSFB3 PE=2 SV=1	predicted protein [Populus trichocarpa]
CL14620Contig1	p3	(GCT)5	15	301	316	GGAGCTGACAATGAAGGAC	55.61	19	GATATTTCTCCCTCTGCAAAC	55.54	21	135	--	--	Molecular Function: nucleic acid binding (GO:0003676);; Molecular Function: protein binding (GO:0005515);; Molecular Function: ATP binding (GO:0005524);; Cellular Component: nucleus (GO:0005634);; Cellular Component: mitochondrion (GO:0005739);; Biological Process: response to stress (GO:0006950);; Molecular Function: ATP-dependent helicase activity (GO:0008026);; Cellular Component: plastid (GO:…	--	ATP-dependent RNA helicase DHX29 OS=Homo sapiens GN=DHX29 PE=1 SV=2	hypothetical protein PRUPE_ppa000230mg [Prunus persica]
CL14768Contig1	p3	(TTG)7	21	301	322	GGATCAGGATATTGTTGCAT	54.9	20	TGATCCATTGGAGTTCATCT	55.38	20	150	--	--	Biological Process: MAPK cascade (GO:0000165);; Biological Process: response to hypoxia (GO:0001666);; Molecular Function: DNA binding (GO:0003677);; Molecular Function: sequence-specific DNA binding transcription factor activity (GO:0003700);; Cellular Component: nucleus (GO:0005634);; Cellular Component: cytosol (GO:0005829);; Biological Process: regulation of transcription, DNA-dependent (GO:0…	--	NAC domain-containing protein 7 OS=Arabidopsis thaliana GN=NAC007 PE=2 SV=2	PREDICTED: NAC domain-containing protein 7-like [Cucumis sativus]
CL2Contig2	p2	(TA)8	16	301	317	GACTTAATAGTCACGGAATGC	54.1	21	GGAGAGTGAAGAAAAAGGAAC	54.74	21	154	--	--	Molecular Function: DNA binding (GO:0003677);; Molecular Function: sequence-specific DNA binding transcription factor activity (GO:0003700);; Cellular Component: nucleus (GO:0005634);; Biological Process: regulation of transcription, DNA-dependent (GO:0006355);; Biological Process: negative regulation of cell proliferation (GO:0008285);; Biological Process: auxin mediated signaling pathway (GO:00…	--	Auxin response factor 2 OS=Arabidopsis thaliana GN=ARF2 PE=1 SV=2	auxin response factor-like protein [Cucumis melo subsp. melo]
CL125Contig1	p3	(TGT)6	18	301	319	AAAGCAGTAGTTGAAGGGTTAG	54.73	22	CGAGTCATCATCAACTTTCA	54.61	20	151	--	--	Molecular Function: sequence-specific DNA binding transcription factor activity (GO:0003700);; Cellular Component: nucleus (GO:0005634);; Biological Process: transcription, DNA-dependent (GO:0006351);; Biological Process: regulation of transcription, DNA-dependent (GO:0006355);; Biological Process: regulation of nitrogen utilization (GO:0006808);; Biological Process: multicellular organismal deve…	--	Protein SCARECROW OS=Ipomoea nil GN=SCR PE=1 SV=1	PREDICTED: uncharacterized protein LOC101230653 [Cucumis sativus]
CL155Contig1	p3	(AGA)5	15	301	316	GAAGACGAAGATGAATATGAGG	55.56	22	GGTAATGGTAACCCAGATGAT	55.39	21	167	[BK]	--	Cellular Component: nuclear chromatin (GO:0000790);; Biological Process: nuclear-transcribed mRNA catabolic process (GO:0000956);; Biological Process: in utero embryonic development (GO:0001701);; Molecular Function: transcription coactivator activity (GO:0003713);; Cellular Component: cytoplasm (GO:0005737);; Cellular Component: plasma membrane (GO:0005886);; Biological Process: regulation of tr…	K11723|0.0|vvi:100267501|hypothetical protein LOC100267501	Bromodomain-containing protein 9 OS=Xenopus tropicalis GN=brd9 PE=2 SV=1	PREDICTED: uncharacterized protein LOC101229993 [Cucumis sativus]
CL245Contig1	p3	(AGA)6	18	213	231	CCATATGATGAACCTTCCAC	55.25	20	CTCTCAGCCCATAACTCAATA	54.67	21	155	--	--	Biological Process: developmental process involved in reproduction (GO:0003006);; Molecular Function: nucleic acid binding (GO:0003676);; Biological Process: regulation of transcription, DNA-dependent (GO:0006355);; Biological Process: response to stress (GO:0006950);; Biological Process: signal transduction (GO:0007165);; Biological Process: response to temperature stimulus (GO:0009266);; Biolog…	--	Zinc finger protein ZAT9 OS=Arabidopsis thaliana GN=ZAT9 PE=2 SV=1	hypothetical protein PRUPE_ppa021208mg [Prunus persica]
CL245Contig1	p3	(ATC)6	18	301	319	ACTCGTAGAAGATCCAAAAGG	55.23	21	TGCCTGAGATTGAACTTACTG	55.64	21	154	--	--	Biological Process: developmental process involved in reproduction (GO:0003006);; Molecular Function: nucleic acid binding (GO:0003676);; Biological Process: regulation of transcription, DNA-dependent (GO:0006355);; Biological Process: response to stress (GO:0006950);; Biological Process: signal transduction (GO:0007165);; Biological Process: response to temperature stimulus (GO:0009266);; Biolog…	--	Zinc finger protein ZAT9 OS=Arabidopsis thaliana GN=ZAT9 PE=2 SV=1	hypothetical protein PRUPE_ppa021208mg [Prunus persica]
CL253Contig1	p2	(AT)6	12	301	313	ATGTAGCCAAGTGGATCAAG	55.24	20	CGCCGTAGTAAATAAGAGAGA	54.24	21	183	--	--	Molecular Function: RNA binding (GO:0003723);; Molecular Function: iron ion binding (GO:0005506);; Biological Process: mRNA processing (GO:0006397);; Biological Process: tRNA processing (GO:0008033);; Biological Process: RNA splicing (GO:0008380);; Cellular Component: chloroplast (GO:0009507);; Cellular Component: photosystem II (GO:0009523);; Cellular Component: chloroplast thylakoid membrane (G…	K02703|0.0|pop:Poptr_cp001|psbA	Maturase K OS=Cucumis sativus GN=matK PE=3 SV=1	maturase K [Cucumis melo subsp. melo]
CL364Contig1	p3	(GAG)5	15	301	316	GAGGAGCATGAACAGAAATC	54.8	20	ACCTAAAACATCTCCTCCATC	54.82	21	164	--	--	Biological Process: MAPK cascade (GO:0000165);; Molecular Function: nucleotide binding (GO:0000166);; Molecular Function: protein serine/threonine kinase activity (GO:0004674);; Molecular Function: ATP binding (GO:0005524);; Cellular Component: plasma membrane (GO:0005886);; Biological Process: polysaccharide metabolic process (GO:0005976);; Biological Process: protein phosphorylation (GO:0006468…	--	Proline-rich receptor-like protein kinase PERK8 OS=Arabidopsis thaliana GN=PERK8 PE=1 SV=1	ATP binding protein [Cucumis melo subsp. melo]
CL380Contig2	p3	(AGA)5	15	301	316	CCGCAGTTAAGACAGAGAGTA	54.97	21	GATATCAAAATGGCTTCCAG	54.81	20	158	--	--	Molecular Function: protein serine/threonine kinase activity (GO:0004674);; Molecular Function: binding (GO:0005488);; Molecular Function: protein binding (GO:0005515);; Cellular Component: nucleus (GO:0005634);; Cellular Component: mitochondrion (GO:0005739);; Cellular Component: plasma membrane (GO:0005886);; Biological Process: regulation of transcription, DNA-dependent (GO:0006355);; Biologic…	--	B3 domain-containing protein Os07g0679700 OS=Oryza sativa subsp. japonica GN=Os07g0679700 PE=2 SV=1	High-level expression of sugar-inducible gene 2, putative isoform 2 [Theobroma cacao]
CL513Contig1	p2	(GA)6	12	301	313	GACGTTGCTGGTTTACTAATG	55.11	21	CATCTCTCCCTTTCTCACTCT	55.17	21	127	[L]	Replication, recombination and repair	Molecular Function: DNA secondary structure binding (GO:0000217);; Cellular Component: nuclear chromosome (GO:0000228);; Molecular Function: four-way junction DNA binding (GO:0000400);; Biological Process: meiotic mismatch repair (GO:0000710);; Molecular Function: damaged DNA binding (GO:0003684);; Molecular Function: protein binding (GO:0005515);; Biological Process: ATP catabolic process (GO:00…	K08737|0.0|vvi:100255608|hypothetical protein LOC100255608	DNA mismatch repair protein MSH6 OS=Arabidopsis thaliana GN=MSH6 PE=1 SV=2	PREDICTED: DNA mismatch repair protein MSH6-like [Cucumis sativus]
CL708Contig1	p2	(AG)6	12	83	95	CCTTGTTTTTCACTCTTCCTC	55.67	21	CTCATGAGATCTTGAGCTGTT	54.64	21	151	--	--	--	--	Type-2 histone deacetylase 1 OS=Dictyostelium discoideum GN=hdaD PE=2 SV=1	PREDICTED: uncharacterized protein LOC101205343 [Cucumis sativus]
CL708Contig1	p3	(TTC)5	15	301	316	CTGAATCATCGCCTAGAGTTA	54.83	21	AGTTACAGAGGCTGCCTTTAC	55.48	21	203	--	--	--	--	Type-2 histone deacetylase 1 OS=Dictyostelium discoideum GN=hdaD PE=2 SV=1	PREDICTED: uncharacterized protein LOC101205343 [Cucumis sativus]
CL781Contig1	p3	(AAT)5	15	301	313	ATACAAAATTGTGCCTCGTC	55.24	20	GATTGAAGAGCTCAAAATGC	55.16	20	148	[KL]	--	Molecular Function: DNA binding (GO:0003677);; Molecular Function: helicase activity (GO:0004386);; Molecular Function: protein binding (GO:0005515);; Molecular Function: ATP binding (GO:0005524);; Cellular Component: nucleus (GO:0005634);; Cellular Component: nucleolus (GO:0005730);; Biological Process: ATP catabolic process (GO:0006200);; Biological Process: DNA-dependent DNA replication (GO:00…	--	Putative SWI/SNF-related matrix-associated actin-dependent regulator of chromatin subfamily A member 3-like 3 OS=Arabidopsis thaliana GN=At5g43530 PE=3 SV=1	PREDICTED: putative SWI/SNF-related matrix-associated actin-dependent regulator of chromatin subfamily A member 3-like 3-like [Cucumis sativus]
CL821Contig1	p3	(TTC)6	18	97	112	ACTGACTACGTTTCCACCTTT	55.49	21	ATTAAGGTATCGGAGAACGAG	55.2	21	159	--	--	Molecular Function: ubiquitin-protein ligase activity (GO:0004842);; Cellular Component: nucleus (GO:0005634);; Biological Process: nucleobase-containing compound metabolic process (GO:0006139);; Biological Process: defense response (GO:0006952);; Biological Process: anatomical structure morphogenesis (GO:0009653);; Biological Process: response to organic substance (GO:0010033);; Biological Proce…	--	E3 ubiquitin-protein ligase ATL4 OS=Arabidopsis thaliana GN=ATL4 PE=1 SV=1	PREDICTED: E3 ubiquitin-protein ligase ATL4-like [Cucumis sativus]
CL888Contig1	p3	(AGA)5	15	112	127	GAATCCAGAACCAGTCTCTTT	55.01	21	GTTATAAAAAGGGGCGAATC	55.5	20	143	[O]	Posttranslational modification, protein turnover, chaperones	Cellular Component: mitochondrion (GO:0005739);; Biological Process: protein folding (GO:0006457);; Biological Process: response to stress (GO:0006950);; Biological Process: response to osmotic stress (GO:0006970);; Cellular Component: chloroplast (GO:0009507);; Biological Process: response to high light intensity (GO:0009644);; Biological Process: heat acclimation (GO:0010286);; Biological Proce…	--	25.3 kDa heat shock protein, chloroplastic OS=Arabidopsis thaliana GN=HSP25.3 PE=2 SV=1	PREDICTED: 25.3 kDa heat shock protein, chloroplastic-like [Cucumis sativus]
CL995Contig1	p3	(GCA)5	15	301	316	AATTCGTCATCATCCAGAAG	55.12	20	GTTGTTTGGTAGCGTTCG	55.2	18	150	--	--	Biological Process: protein glycosylation (GO:0006486);; Biological Process: transport (GO:0006810);; Molecular Function: metal ion binding (GO:0046872);;	--	Vacuolar protein sorting-associated protein 8 homolog OS=Homo sapiens GN=VPS8 PE=1 SV=3	PREDICTED: vacuolar protein sorting-associated protein 8 homolog [Cucumis sativus]
CL1148Contig1	p3	(ACA)5	15	301	316	GTCAATCAGAGAAGCCCTAAG	55.78	21	AAACTCGGTCTAACTCGTCTT	54.9	21	143	[K]	Transcription	Molecular Function: DNA binding (GO:0003677);; Molecular Function: sequence-specific DNA binding transcription factor activity (GO:0003700);; Molecular Function: protein binding (GO:0005515);; Cellular Component: nucleus (GO:0005634);; Biological Process: DNA metabolic process (GO:0006259);; Biological Process: transcription, DNA-dependent (GO:0006351);; Biological Process: protein acetylation (G…	--	Homeobox-leucine zipper protein ANTHOCYANINLESS 2 OS=Arabidopsis thaliana GN=ANL2 PE=2 SV=1	HD domain class transcription factor [Malus domestica]
CL1193Contig1	p3	(GCT)5	15	301	316	CCTCCAGTTTCTCTTTCTGTT	55.26	21	ACCAGCTATTTTCCTCTTCTG	55.38	21	123	[CR]	--	Molecular Function: nucleotide binding (GO:0000166);; Molecular Function: RNA binding (GO:0003723);; Molecular Function: NADPH:quinone reductase activity (GO:0003960);; Cellular Component: mitochondrion (GO:0005739);; Cellular Component: peroxisome (GO:0005777);; Cellular Component: cytosol (GO:0005829);; Biological Process: lipid metabolic process (GO:0006629);; Molecular Function: zinc ion bind…	--	Quinone oxidoreductase-like protein 2 homolog OS=Nematostella vectensis GN=v1g238856 PE=3 SV=1	PREDICTED: 2-hydroxy-6-oxononadienedioate/2-hydroxy-6-oxononatrienedioate hydrolase-like [Cucumis sativus]
CL1494Contig1	p2	(AG)7	14	85	99	AGAGCAAAAACAGAGAGGAGT	55	21	AGGATTGAGAGCTTAGAATGG	55.31	21	145	--	--	Molecular Function: sequence-specific DNA binding transcription factor activity (GO:0003700);; Molecular Function: binding (GO:0005488);; Cellular Component: nucleus (GO:0005634);; Biological Process: methylation-dependent chromatin silencing (GO:0006346);; Biological Process: regulation of transcription, DNA-dependent (GO:0006355);; Biological Process: cell adhesion (GO:0007155);; Biological Pro…	K14486|0.0|rcu:RCOM_1597120|Auxin response factor, putative	Auxin response factor 5 OS=Arabidopsis thaliana GN=ARF5 PE=1 SV=3	PREDICTED: auxin response factor 5-like [Cucumis sativus]
CL1508Contig1	p3	(GGA)6	18	301	319	TGGTGGAATGGGAAATAAC	55.67	19	GCTTGAATCATCCTCTGGTA	55.29	20	168	[M]	Cell wall/membrane/envelope biogenesis	--	--	Uncharacterized proline-rich protein (Fragment) OS=Owenia fusiformis PE=4 SV=1	PREDICTED: uncharacterized protein LOC101208051 [Cucumis sativus]
CL1532Contig1	p2	(GA)11	22	301	323	TATATAGGGATCCGAGACACA	54.71	21	TTCACCTTTTTCGTCTTCTG	55.6	20	158	[J]	Translation, ribosomal structure and biogenesis	Biological Process: RNA methylation (GO:0001510);; Molecular Function: sequence-specific DNA binding transcription factor activity (GO:0003700);; Molecular Function: structural constituent of ribosome (GO:0003735);; Molecular Function: protein binding (GO:0005515);; Cellular Component: nucleus (GO:0005634);; Biological Process: translation (GO:0006412);; Biological Process: cell adhesion (GO:0007…	--	Homeobox protein knotted-1-like 7 OS=Arabidopsis thaliana GN=KNAT7 PE=2 SV=1	PREDICTED: homeobox protein knotted-1-like 7-like [Cucumis sativus]
CL1677Contig1	p2	(AT)6	12	149	161	AGAATGAGGAGAGGAGATGAG	55.08	21	CAGCAGAATGATTCAGAGAGT	54.64	21	133	--	--	Molecular Function: DNA binding (GO:0003677);; Molecular Function: binding (GO:0005488);; Cellular Component: cytoplasm (GO:0005737);; Cellular Component: intracellular organelle (GO:0043229);;	--	LisH domain and HEAT repeat-containing protein KIAA1468 OS=Mus musculus GN=Kiaa1468 PE=1 SV=1	PREDICTED: LOW QUALITY PROTEIN: lisH domain and HEAT repeat-containing protein KIAA1468 homolog [Cucumis sativus]
CL1845Contig1	p3	(TTC)5	15	301	316	GTTGTGTTCTTCGTCTTCATC	54.81	21	CTCAGAGGAAGAAGGGTTAAG	54.96	21	158	--	--	--	--	Probable serine/threonine-protein kinase samkC OS=Dictyostelium discoideum GN=samkC PE=3 SV=2	DNA binding protein, putative [Ricinus communis]
CL1849Contig1	p3	(CAC)5	15	216	231	GATATGGAAATCGTGACACC	55.24	20	CGATCTATCGAAGCCATTAG	55.18	20	150	--	--	Molecular Function: sequence-specific DNA binding RNA polymerase II transcription factor activity (GO:0000981);; Biological Process: regionalization (GO:0003002);; Molecular Function: protein binding (GO:0005515);; Cellular Component: cytoplasm (GO:0005737);; Biological Process: transcription from RNA polymerase II promoter (GO:0006366);; Biological Process: cellular amino acid metabolic process …	--	BEL1-like homeodomain protein 2 OS=Arabidopsis thaliana GN=BLH2 PE=1 SV=3	BEL1-like homeodomain protein 2 isoform 1 [Theobroma cacao]
CL1882Contig1	p3	(ATC)5	15	301	316	ATGGAGCAAGGGATATTTTC	55.73	20	GATTCCACTGAGTCTGGAACT	55.8	21	169	--	--	Molecular Function: DNA binding (GO:0003677);; Molecular Function: sequence-specific DNA binding transcription factor activity (GO:0003700);; Cellular Component: nucleus (GO:0005634);; Biological Process: regulation of transcription, DNA-dependent (GO:0006355);; Biological Process: determination of bilateral symmetry (GO:0009855);; Biological Process: polarity specification of adaxial/abaxial axi…	--	Dof zinc finger protein DOF5.4 OS=Arabidopsis thaliana GN=DOF5.4 PE=2 SV=2	hypothetical protein PRUPE_ppa008568mg [Prunus persica]
CL1921Contig1	p3	(AAT)5	15	109	124	AAGACATGACTATGAGCAAGC	54.7	21	GGTCATGGAAAGGAAGAAAT	55.62	20	183	[O]	Posttranslational modification, protein turnover, chaperones	Molecular Function: nucleotide binding (GO:0000166);; Molecular Function: binding (GO:0005488);; Cellular Component: mitochondrion (GO:0005739);; Cellular Component: membrane (GO:0016020);; Molecular Function: hydrolase activity (GO:0016787);; Cellular Component: proteasome accessory complex (GO:0022624);; Biological Process: mitochondrial respiratory chain complex III assembly (GO:0034551);; Bio…	--	Probable mitochondrial chaperone bcs1 OS=Schizosaccharomyces pombe (strain 972 / ATCC 24843) GN=SPAC644.07 PE=2 SV=1	PREDICTED: katanin p60 ATPase-containing subunit A1-like, partial [Cucumis sativus]
CL2028Contig1	p3	(TTC)5	15	301	316	AGGAGTATTCTTCGGTTTCTG	55.23	21	TAGGCAGTCCAATAACAGCTA	55.35	21	163	--	--	Biological Process: response to hypoxia (GO:0001666);; Molecular Function: DNA binding (GO:0003677);; Molecular Function: sequence-specific DNA binding transcription factor activity (GO:0003700);; Molecular Function: protein binding (GO:0005515);; Cellular Component: cytosol (GO:0005829);; Biological Process: regulation of transcription, DNA-dependent (GO:0006355);; Biological Process: signal tra…	--	NAC domain-containing protein 43 OS=Arabidopsis thaliana GN=NAC043 PE=2 SV=2	PREDICTED: NAC domain-containing protein 43-like [Cucumis sativus]
CL2411Contig1	p2	(CT)10	20	301	321	GGAGTGGAATGAGGAGATG	55.36	19	GAAAGAAACGGAAGAGAGAGA	55.47	21	152	--	--	Molecular Function: catalytic activity (GO:0003824);; Molecular Function: protein binding (GO:0005515);; Biological Process: cellular protein modification process (GO:0006464);; Biological Process: signal transduction (GO:0007165);; Biological Process: response to abiotic stimulus (GO:0009628);; Biological Process: cellular membrane organization (GO:0016044);; Molecular Function: ligase activity …	--	Pollen-specific protein SF21 OS=Helianthus annuus GN=SF21 PE=2 SV=1	PREDICTED: vacuolar protein 8-like [Cucumis sativus]
CL2504Contig1	p3	(GTG)5	15	301	316	TTGAGCAAGGAACACTTACC	55.45	20	CTTCTTCTTCTCCTACCCCTA	54.51	21	150	--	--	Molecular Function: sequence-specific DNA binding transcription factor activity (GO:0003700);; Molecular Function: protein binding (GO:0005515);; Cellular Component: nucleus (GO:0005634);; Biological Process: chromatin assembly or disassembly (GO:0006333);; Biological Process: regulation of transcription, DNA-dependent (GO:0006355);; Biological Process: regulation of translation (GO:0006417);; Bi…	--	Axial regulator YABBY 1 OS=Arabidopsis thaliana GN=YAB1 PE=1 SV=1	PREDICTED: axial regulator YABBY 1-like [Cucumis sativus]
CL2699Contig1	p3	(GAA)5	15	170	185	ATACAGGAGACTTCGACCTTC	55.04	21	TAATCCTTCACACGCTTCTT	55.12	20	146	[RTKL]	--	Biological Process: alternative nuclear mRNA splicing, via spliceosome (GO:0000380);; Molecular Function: cyclin-dependent protein kinase activity (GO:0004693);; Molecular Function: ATP binding (GO:0005524);; Cellular Component: nucleolus (GO:0005730);; Cellular Component: cytosol (GO:0005829);; Cellular Component: plasma membrane (GO:0005886);; Biological Process: mRNA processing (GO:0006397);; …	K08819|0.0|vvi:100263383|similar to cdc2MsC	Cyclin-dependent kinase C-2 OS=Oryza sativa subsp. japonica GN=CDKC-2 PE=2 SV=1	PREDICTED: cyclin-dependent kinase C-1-like [Cucumis sativus]
CL2699Contig1	p2	(TA)7	14	301	315	TATGACCTAATCAGCCTGTTG	55.44	21	GCCTATGAGATCCATCTTGA	55.2	20	139	[RTKL]	--	Biological Process: alternative nuclear mRNA splicing, via spliceosome (GO:0000380);; Molecular Function: cyclin-dependent protein kinase activity (GO:0004693);; Molecular Function: ATP binding (GO:0005524);; Cellular Component: nucleolus (GO:0005730);; Cellular Component: cytosol (GO:0005829);; Cellular Component: plasma membrane (GO:0005886);; Biological Process: mRNA processing (GO:0006397);; …	K08819|0.0|vvi:100263383|similar to cdc2MsC	Cyclin-dependent kinase C-2 OS=Oryza sativa subsp. japonica GN=CDKC-2 PE=2 SV=1	PREDICTED: cyclin-dependent kinase C-1-like [Cucumis sativus]
CL2839Contig1	p3	(TTC)5	15	46	61	TGACCCATCTCTCTTATTAGC	53.73	21	AGGGAAGTTGTGGAAGAGATA	55.47	21	160	--	--	Cellular Component: endosome (GO:0005768);; Cellular Component: Golgi apparatus (GO:0005794);; Cellular Component: trans-Golgi network (GO:0005802);; Cellular Component: chloroplast (GO:0009507);;	--	--	hypothetical protein PRUPE_ppa000969mg [Prunus persica]
CL2961Contig1	p2	(TC)6	12	301	313	AATTGATAGCGATCATACGG	55.3	20	CATTCGTCTATCGGTGAAAT	55.17	20	144	[O]	Posttranslational modification, protein turnover, chaperones	Cellular Component: ubiquitin ligase complex (GO:0000151);; Biological Process: regulation of membrane depolarization (GO:0003254);; Molecular Function: ubiquitin-protein ligase activity (GO:0004842);; Cellular Component: nucleus (GO:0005634);; Cellular Component: cytoplasm (GO:0005737);; Cellular Component: plasma membrane (GO:0005886);; Biological Process: transcription from RNA polymerase II p…	K10588|0.0|vvi:100247661|hypothetical protein LOC100247661	E3 ubiquitin-protein ligase UPL7 OS=Arabidopsis thaliana GN=UPL7 PE=2 SV=1	PREDICTED: E3 ubiquitin-protein ligase UPL7-like [Cucumis sativus]
CL3079Contig1	p3	(GAA)6	18	75	93	ACTTGGATCTGAATCTGACCT	55.29	21	GGAAGGAATGAGAGAGTTAGG	54.71	21	159	[GO]	--	Cellular Component: nucleus (GO:0005634);; Biological Process: anther dehiscence (GO:0009901);; Biological Process: pollen exine formation (GO:0010584);; Cellular Component: membrane (GO:0016020);; Molecular Function: hydrolase activity (GO:0016787);; Cellular Component: cytoplasmic part (GO:0044444);; Biological Process: nucleoside phosphate catabolic process (GO:1901292);;	--	Probable apyrase 7 OS=Arabidopsis thaliana GN=APY7 PE=2 SV=1	PREDICTED: probable apyrase 7-like [Cucumis sativus]
CL3152Contig1	p3	(AAG)5	15	301	316	AATACATGGGAAGAACATGC	54.99	20	CTATCAAGCCTTGGAAGATG	55.05	20	160	--	--	Biological Process: cellular metabolic process (GO:0044237);; Biological Process: primary metabolic process (GO:0044238);; Biological Process: cellular biosynthetic process (GO:0044249);; Biological Process: cellular macromolecule metabolic process (GO:0044260);; Biological Process: organic substance metabolic process (GO:0071704);;	--	NAC domain-containing protein 12 OS=Arabidopsis thaliana GN=NAC012 PE=2 SV=1	PREDICTED: NAC domain-containing protein 12-like [Cucumis sativus]
CL3156Contig1	p2	(AC)6	12	301	313	GTTGAATCTTCACCTTGGAGT	55.79	21	GACGTTTCCATCTCTCTCTCT	55.16	21	156	[O]	Posttranslational modification, protein turnover, chaperones	Biological Process: mitotic cell cycle (GO:0000278);; Biological Process: nuclear-transcribed mRNA catabolic process (GO:0000956);; Molecular Function: protein binding (GO:0005515);; Cellular Component: nucleus (GO:0005634);; Cellular Component: cytosol (GO:0005829);; Biological Process: methylation-dependent chromatin silencing (GO:0006346);; Biological Process: RNA processing (GO:0006396);; Bio…	--	Probable UDP-N-acetylglucosamine--peptide N-acetylglucosaminyltransferase SPINDLY OS=Petunia hybrida GN=SPY PE=2 SV=1	PREDICTED: probable UDP-N-acetylglucosamine--peptide N-acetylglucosaminyltransferase SPINDLY-like [Cucumis sativus]
CL3186Contig1	p3	(AGC)5	15	301	316	GCCTGATTCTGATTTTGAGA	55.42	20	GAGAAGAGCGTTTTGTACATC	54.27	21	150	[R]	General function prediction only	--	--	Uncharacterized protein sll0103 OS=Synechocystis sp. (strain PCC 6803 / Kazusa) GN=sll0103 PE=4 SV=1	PREDICTED: uncharacterized protein LOC101220919 [Cucumis sativus]
CL3200Contig1	p2	(CT)6	12	58	70	CGCTCTATTTGTACTCTTGTCA	55	22	ATCTCTGGATTCTGCTCAACT	55.62	21	184	[G]	Carbohydrate transport and metabolism	Biological Process: maltose metabolic process (GO:0000023);; Molecular Function: hydrolase activity, hydrolyzing O-glycosyl compounds (GO:0004553);; Molecular Function: alpha-amylase activity (GO:0004556);; Cellular Component: chloroplast (GO:0009507);; Biological Process: amylopectin biosynthetic process (GO:0010021);; Molecular Function: isoamylase activity (GO:0019156);; Biological Process: st…	--	Isoamylase 2, chloroplastic OS=Arabidopsis thaliana GN=ISA2 PE=1 SV=2	PREDICTED: isoamylase 2, chloroplastic-like [Cucumis sativus]
CL3252Contig1	p2	(GA)9	18	301	319	TTACAGAACTGGCTGTGTCTT	55.12	21	GGAGTGCTCTGTAAATGCTC	55.09	20	128	[TDBLU]	--	Biological Process: cytokinesis by cell plate formation (GO:0000911);; Molecular Function: RNA polymerase III type 1 promoter DNA binding (GO:0001030);; Molecular Function: RNA polymerase III type 2 promoter DNA binding (GO:0001031);; Molecular Function: RNA polymerase III type 3 promoter DNA binding (GO:0001032);; Molecular Function: TFIIIC-class transcription factor binding (GO:0001156);; Biolo…	K07203|0.0|pop:POPTR_1069777|hypothetical protein	Serine/threonine-protein kinase TOR OS=Arabidopsis thaliana GN=TOR PE=1 SV=1	PREDICTED: LOW QUALITY PROTEIN: serine/threonine-protein kinase TOR-like [Cucumis sativus]
CL3752Contig1	p2	(TC)8	16	301	317	GCTTCCTCTGCTTGTTTTT	54.8	19	GTGGGTTCTTCTTTTTCTTC	53.12	20	165	--	--	Biological Process: polysaccharide biosynthetic process (GO:0000271);; Biological Process: establishment of planar polarity (GO:0001736);; Biological Process: amino acid transmembrane transport (GO:0003333);; Cellular Component: endosome (GO:0005768);; Cellular Component: Golgi apparatus (GO:0005794);; Cellular Component: plasma membrane (GO:0005886);; Biological Process: acetyl-CoA metabolic pro…	K13946|0.0|rcu:RCOM_1151110|amino acid transporter, putative	Auxin transporter-like protein 2 OS=Medicago truncatula GN=LAX2 PE=2 SV=1	PREDICTED: auxin transporter-like protein 4-like [Cucumis sativus]
CL3830Contig1	p2	(AG)7	14	301	315	GGGTTGTTCCTATTATTACCC	54.31	21	CCTCTGTATTCTTGTTGATGG	54.82	21	153	--	--	Biological Process: terpenoid biosynthetic process (GO:0016114);; Cellular Component: anchored to plasma membrane (GO:0046658);; Biological Process: biological regulation (GO:0065007);;	--	Uncharacterized GPI-anchored protein At5g19250 OS=Arabidopsis thaliana GN=At5g19250 PE=1 SV=1	GPI-anchored protein-like protein [Cucumis melo subsp. melo]
CL4309Contig1	p3	(AAT)5	15	301	316	CTCCTTTGAACTTCTTTCCA	54.64	20	GAAAATGTCCCCTGAAGAAT	55.62	20	149	[V]	Defense mechanisms	Biological Process: polysaccharide biosynthetic process (GO:0000271);; Molecular Function: protein binding (GO:0005515);; Molecular Function: ATP binding (GO:0005524);; Cellular Component: nucleus (GO:0005634);; Cellular Component: plasma membrane (GO:0005886);; Biological Process: ATP catabolic process (GO:0006200);; Biological Process: cell adhesion (GO:0007155);; Biological Process: regulation…	--	ABC transporter B family member 14 OS=Arabidopsis thaliana GN=ABCB14 PE=3 SV=1	PREDICTED: ABC transporter B family member 10-like, partial [Cucumis sativus]
CL4601Contig1	p4	(TGTT)6	24	28	52	CACTAGAAATCGAAGCTAGAGAG	54.7	23	TAGAGACAACATGGAAACCAG	55.31	21	173	[GER]	--	Biological Process: polysaccharide biosynthetic process (GO:0000271);; Molecular Function: protein binding (GO:0005515);; Cellular Component: nucleus (GO:0005634);; Cellular Component: Golgi apparatus (GO:0005794);; Cellular Component: plasma membrane (GO:0005886);; Cellular Component: integral to plasma membrane (GO:0005887);; Cellular Component: cell cortex (GO:0005938);; Biological Process: wa…	--	Protein WALLS ARE THIN 1 OS=Arabidopsis thaliana GN=WAT1 PE=1 SV=1	PREDICTED: auxin-induced protein 5NG4-like [Cucumis sativus]
CL5078Contig1	p3	(TAG)6	18	301	319	CCTAGAGAACCAACATCACTG	54.88	21	TGAATAGAGCCTCTTCTCTCC	55.42	21	208	--	--	Molecular Function: RNA polymerase II transcription factor binding transcription factor activity (GO:0001076);; Molecular Function: DNA binding (GO:0003677);; Molecular Function: sequence-specific DNA binding transcription factor activity (GO:0003700);; Molecular Function: protein binding (GO:0005515);; Cellular Component: nucleus (GO:0005634);; Cellular Component: mitochondrion (GO:0005739);; Ce…	--	B3 domain-containing transcription factor LEC2 OS=Arabidopsis thaliana GN=LEC2 PE=2 SV=1	AP2/B3-like transcriptional factor family protein, putative [Theobroma cacao]
CL5250Contig1	p3	(TCA)5	15	301	316	CTCGATAAGAACGACATCACT	54.54	21	GTTGTTCTATTTAAGCCTCCTG	55.03	22	152	--	--		K13105|1e-102|vvi:100263241|hypothetical protein LOC100263241	Histidine-rich glycoprotein OS=Plasmodium lophurae PE=4 SV=1	PREDICTED: uncharacterized protein LOC101212653 [Cucumis sativus]
CL5308Contig1	p2	(CT)9	18	79	97	TTTGTTTGAGTGTGTGGTGT	54.81	20	TACTCGGTGACATTGGTTATC	55.1	21	152	[C]	Energy production and conversion	Biological Process: transition metal ion transport (GO:0000041);; Biological Process: fatty acid alpha-oxidation (GO:0001561);; Molecular Function: receptor binding (GO:0005102);; Cellular Component: nucleus (GO:0005634);; Cellular Component: vacuole (GO:0005773);; Cellular Component: peroxisome (GO:0005777);; Cellular Component: peroxisomal matrix (GO:0005782);; Molecular Function: glycolate oxi…	K11517|0.0|vvi:100232932|GOX	Peroxisomal (S)-2-hydroxy-acid oxidase GLO1 OS=Arabidopsis thaliana GN=GLO1 PE=1 SV=1	PREDICTED: peroxisomal (S)-2-hydroxy-acid oxidase GLO1-like [Cucumis sativus]
CL5974Contig1	p3	(CTT)5	15	301	316	CAGGAACTCTAAGAGGGTGTT	55.14	21	GACTTTTCCTTAAACCAGAGC	54.96	21	150	[OU]	--	Molecular Function: DNA binding (GO:0003677);; Cellular Component: cytoplasm (GO:0005737);; Biological Process: DNA metabolic process (GO:0006259);; Biological Process: transcription, DNA-dependent (GO:0006351);; Biological Process: response to stress (GO:0006950);; Biological Process: embryo sac egg cell differentiation (GO:0009560);; Biological Process: response to abiotic stimulus (GO:0009628)…	--	Uncharacterized protein C683.02c OS=Schizosaccharomyces pombe (strain 972 / ATCC 24843) GN=SPAC683.02c PE=4 SV=1	PREDICTED: uncharacterized protein LOC101212555 [Cucumis sativus]
CL6991Contig1	p3	(GAA)6	18	301	319	GAGAGAGAATGAAAGGGAATC	54.57	21	TGAGAAGCAACAAACTGACA	55.42	20	243	[TZDR]	--	Molecular Function: calcium ion binding (GO:0005509);; Biological Process: detection of calcium ion (GO:0005513);; Molecular Function: protein binding (GO:0005515);; Cellular Component: nucleus (GO:0005634);; Cellular Component: vacuole (GO:0005773);; Cellular Component: vacuolar membrane (GO:0005774);; Cellular Component: cytosol (GO:0005829);; Cellular Component: plasma membrane (GO:0005886);; …	K02183|5e-99|vvi:100261610|hypothetical protein LOC100261610	Calmodulin OS=Capsicum annuum GN=CCM1 PE=2 SV=3	PREDICTED: calmodulin-related protein-like [Cucumis sativus]
CL7468Contig1	p3	(CTT)7	21	301	322	GGTTTCAGCAGAAAGAAAGTG	56.75	21	ATCAACCCTCTCAGTCTCAAT	55.29	21	140	--	--	--	--	--	PREDICTED: uncharacterized protein LOC101205116 [Cucumis sativus]
CL7677Contig1	p3	(TTC)6	18	301	319	TCTCTGGAAAAGCATCTCAT	54.98	20	GTAACCATTTTTCTCCTCCAC	55.31	21	194	[P]	Inorganic ion transport and metabolism	Biological Process: retinoid metabolic process (GO:0001523);; Molecular Function: protein binding (GO:0005515);; Cellular Component: mitochondrion (GO:0005739);; Cellular Component: cytosol (GO:0005829);; Cellular Component: chloroplast stroma (GO:0009570);; Biological Process: response to nitrate (GO:0010167);; Biological Process: nitrate transport (GO:0015706);; Cellular Component: membrane (GO…	K00366|0.0|pop:POPTR_837131|nitrite reductase (EC:1.7.7.1)	Ferredoxin--nitrite reductase, chloroplastic OS=Betula pendula GN=NIR1 PE=2 SV=1	PREDICTED: ferredoxin--nitrite reductase, chloroplastic-like [Cucumis sativus]
CL8052Contig1	p2	(GT)7	14	301	315	TGAAGGAGAAGGAGAAGAAGT	54.89	21	CTCTATAAAACCAGCCCCATA	56.01	21	131	[Q]	Secondary metabolites biosynthesis, transport and catabolism	Molecular Function: iron ion binding (GO:0005506);; Cellular Component: extracellular region (GO:0005576);; Cellular Component: endoplasmic reticulum (GO:0005783);; Biological Process: steroid biosynthetic process (GO:0006694);; Molecular Function: electron carrier activity (GO:0009055);; Biological Process: response to UV (GO:0009411);; Biological Process: response to water deprivation (GO:00094…	--	Abscisic acid 8&apos;-hydroxylase 2 OS=Arabidopsis thaliana GN=CYP707A2 PE=2 SV=1	PREDICTED: abscisic acid 8&apos;-hydroxylase 2-like [Cucumis sativus]
CL8574Contig1	p3	(CTT)5	15	301	316	TGATGACCAGTTTTCCTCAT	55.46	20	TCGTAGAGTCTGAATTTGTGG	55.48	21	150	--	--	Molecular Function: phosphatidylinositol-4,5-bisphosphate 5-phosphatase activity (GO:0004439);; Cellular Component: nucleus (GO:0005634);; Cellular Component: mitochondrion (GO:0005739);; Cellular Component: endoplasmic reticulum (GO:0005783);; Cellular Component: Golgi apparatus (GO:0005794);; Biological Process: protein N-linked glycosylation (GO:0006487);; Biological Process: vacuole organizat…	--	Phosphoinositide phosphatase SAC3 OS=Arabidopsis thaliana GN=SAC3 PE=2 SV=1	PREDICTED: phosphoinositide phosphatase SAC3-like isoform X2 [Cicer arietinum]
CL8588Contig1	p2	(TC)8	16	54	70	GAAACGTGAATAAGACTACAGC	53.55	22	GGAAGGTAAAAGACGTTTGA	54.53	20	179	[RTKL]	--	Molecular Function: protein serine/threonine kinase activity (GO:0004674);; Molecular Function: ATP binding (GO:0005524);; Cellular Component: plasma membrane (GO:0005886);; Biological Process: protein phosphorylation (GO:0006468);; Biological Process: microtubule nucleation (GO:0007020);; Biological Process: embryo sac egg cell differentiation (GO:0009560);; Biological Process: abscisic acid med…	--	PTI1-like tyrosine-protein kinase At3g15890 OS=Arabidopsis thaliana GN=At3g15890 PE=1 SV=1	PREDICTED: PTI1-like tyrosine-protein kinase At3g15890-like [Cucumis sativus]
CL8629Contig1	p3	(TGC)7	21	301	322	GTGCCTTTTCCTTCATCATA	55.3	20	GTGGATTCCCTTCTTAAGCTA	55.32	21	152	--	--	Biological Process: transcription, DNA-dependent (GO:0006351);; Cellular Component: chloroplast (GO:0009507);; Biological Process: response to abscisic acid stimulus (GO:0009737);; Biological Process: chloroplast mRNA processing (GO:0010239);; Biological Process: cellular component organization (GO:0016043);; Molecular Function: rRNA binding (GO:0019843);; Molecular Function: protein self-associa…	--	Rho-N domain-containing protein 1, chloroplastic OS=Arabidopsis thaliana GN=RHON1 PE=1 SV=1	PREDICTED: SAP-like protein BP-73-like isoform 1 [Cucumis sativus]
CL8791Contig1	p3	(GAA)6	18	268	286	TCCTTCCACTTCTCAGCTAAT	55.78	21	CTTCCATTGGGTGTGTATATG	55.4	21	154	--	--	--	--	Putative F-box protein At1g65770 OS=Arabidopsis thaliana GN=At1g65770 PE=4 SV=1	PREDICTED: putative F-box protein At1g65770-like [Cucumis sativus]
CL8839Contig1	p2	(CT)6	12	25	39	CCGTCTCTTTAGTTTCAAAGC	56	21	GGAGAGAATAGAGAGGGAAGA	54.33	21	152	--	--	Cellular Component: cytoskeleton (GO:0005856);; Biological Process: cellular protein modification process (GO:0006464);; Biological Process: proteolysis (GO:0006508);; Biological Process: cell cycle process (GO:0022402);; Biological Process: negative regulation of defense response (GO:0031348);; Biological Process: cellular catabolic process (GO:0044248);; Cellular Component: intracellular organe…	--	F-box/LRR-repeat protein 3 OS=Arabidopsis thaliana GN=FBL3 PE=2 SV=1	PREDICTED: F-box/LRR-repeat protein 7-like [Cucumis sativus]
CL8852Contig1	p2	(GA)8	16	301	317	ACGCGTGTAATAAAAACGAC	55.52	20	TAAAGACCTCTCCTTCACCA	54.91	20	154	[I]	Lipid transport and metabolism	Molecular Function: phospholipase D activity (GO:0004630);; Molecular Function: calcium ion binding (GO:0005509);; Molecular Function: protein binding (GO:0005515);; Molecular Function: phosphatidylinositol-4,5-bisphosphate binding (GO:0005546);; Cellular Component: plasma membrane (GO:0005886);; Biological Process: response to oxidative stress (GO:0006979);; Biological Process: response to water…	--	Phospholipase D delta OS=Arabidopsis thaliana GN=PLDDELTA PE=1 SV=2	PREDICTED: phospholipase D delta-like [Cucumis sativus]
CL8888Contig1	p3	(AGG)5	15	301	316	GGAAGGAAAGAGGTCAAGTAA	55.2	21	ACACCAATCTTCTTCTTCTCC	55.01	21	163	--	--	Molecular Function: binding (GO:0005488);; Cellular Component: extracellular region (GO:0005576);; Cellular Component: nucleus (GO:0005634);; Biological Process: vernalization response (GO:0010048);; Biological Process: anthocyanin accumulation in tissues in response to UV light (GO:0043481);; Cellular Component: cell part (GO:0044464);; Biological Process: carpel development (GO:0048440);;	--	Putative protein TPRXL OS=Homo sapiens GN=TPRXL PE=5 SV=2	PREDICTED: uncharacterized protein LOC101204600 [Cucumis sativus]
CL8926Contig1	p2	(GA)7	14	96	110	CGAGCTAGATGTACGAAATAAG	53.9	22	ACTATGAGATATGGGCTCCTC	54.93	21	129	[M]	Cell wall/membrane/envelope biogenesis	Cellular Component: mitochondrion (GO:0005739);; Biological Process: chloroplast organization (GO:0009658);; Cellular Component: chloroplast outer membrane (GO:0009707);; Biological Process: embryo development ending in seed dormancy (GO:0009793);; Cellular Component: chloroplast envelope (GO:0009941);; Biological Process: photosystem II assembly (GO:0010207);; Biological Process: protein transpo…	K07277|0.0|rcu:RCOM_1577380|sorting and assembly machinery (sam50) protein, putative	Outer envelope protein 80, chloroplastic OS=Arabidopsis thaliana GN=OEP80 PE=1 SV=1	PREDICTED: outer envelope protein 80, chloroplastic-like [Cucumis sativus]
CL8933Contig1	p2	(TC)7	14	85	99	GAAGGGGAAATCCTAATCAC	55.14	20	GGAGTCCATTTAGGAGTTGAG	55.47	21	151	[F]	Nucleotide transport and metabolism	Molecular Function: magnesium ion binding (GO:0000287);; Molecular Function: adenylosuccinate synthase activity (GO:0004019);; Molecular Function: GTP binding (GO:0005525);; Cellular Component: cytosol (GO:0005829);; Biological Process: pyrimidine ribonucleotide biosynthetic process (GO:0009220);; Cellular Component: chloroplast stroma (GO:0009570);; Biological Process: 'de novo' AMP biosynthetic…	K01939|0.0|rcu:RCOM_0089930|adenylosuccinate synthetase, putative (EC:6.3.4.4)	Adenylosuccinate synthetase 2, chloroplastic OS=Ricinus communis GN=PURA2 PE=3 SV=1	PREDICTED: adenylosuccinate synthetase, chloroplastic-like [Cucumis sativus]
CL8972Contig1	p3	(CTT)5	15	301	316	CTCATTCATACCCCTTCTCAT	55.68	21	GGGGAAGAAGGGATTTTATAC	55.8	21	152	[S]	Function unknown	Biological Process: cell morphogenesis involved in differentiation (GO:0000904);; Molecular Function: actin binding (GO:0003779);; Cellular Component: nucleus (GO:0005634);; Cellular Component: cytosol (GO:0005829);; Cellular Component: plasma membrane (GO:0005886);; Biological Process: endocytosis (GO:0006897);; Biological Process: cell tip growth (GO:0009932);; Molecular Function: kinase activi…	--	Phosphatidylinositol 4-phosphate 5-kinase 1 OS=Arabidopsis thaliana GN=PIP5K1 PE=1 SV=1	PREDICTED: uncharacterized protein LOC101207479 [Cucumis sativus]
CL8979Contig1	p3	(GAA)6	18	301	319	AAGTGAATCGTAAGGGAGAAG	55.23	21	ACAGTTGCTATGTTTCTCAGC	54.78	21	140	--	--	Molecular Function: inward rectifier potassium channel activity (GO:0005242);; Cellular Component: mitochondrion (GO:0005739);; Cellular Component: endoplasmic reticulum (GO:0005783);; Cellular Component: plasma membrane (GO:0005886);; Biological Process: potassium ion transport (GO:0006813);; Biological Process: response to stress (GO:0006950);; Cellular Component: plasmodesma (GO:0009506);; Cel…	--	Potassium channel AKT2/3 OS=Arabidopsis thaliana GN=AKT2 PE=1 SV=1	PREDICTED: potassium channel AKT2/3-like [Cucumis sativus]
CL8993Contig1	p4	(GAAA)5	20	300	320	GTGGGTTTTAGGGTTTCTTT	54.91	20	CCTGATCAGTAGAGTTTCTGG	54.09	21	150	[O]	Posttranslational modification, protein turnover, chaperones	Cellular Component: nucleus (GO:0005634);; Cellular Component: Golgi stack (GO:0005795);; Cellular Component: plasma membrane (GO:0005886);; Biological Process: protein folding (GO:0006457);; Molecular Function: cytoskeletal protein binding (GO:0008092);; Biological Process: response to heat (GO:0009408);; Biological Process: phototropism (GO:0009638);; Biological Process: response to abscisic ac…	--	Chaperone protein dnaJ 16 OS=Arabidopsis thaliana GN=ATJ16 PE=2 SV=1	PREDICTED: chaperone protein dnaJ 16-like [Cucumis sativus]
CL9095Contig1	p3	(GAG)5	15	139	154	CTAGCAACATCAGCACAGATA	54.19	21	CTTATCTCGCCTTCTTCAAGT	55.54	21	157	--	--	Biological Process: mitotic cell cycle (GO:0000278);; Molecular Function: nucleic acid binding (GO:0003676);; Molecular Function: protein kinase activity (GO:0004672);; Biological Process: cellular process (GO:0009987);; Biological Process: gene expression (GO:0010467);; Biological Process: cellular component organization (GO:0016043);; Biological Process: RNA metabolic process (GO:0016070);; Bio…	--	H/ACA ribonucleoprotein complex non-core subunit NAF1 OS=Saccharomyces cerevisiae (strain YJM789) GN=NAF1 PE=3 SV=1	PREDICTED: uncharacterized protein LOC101203341 [Cucumis sativus]
CL9187Contig1	p2	(AG)6	12	301	313	GGGAGAGAGGGAAGAAGATA	55.01	20	TTGCACACTCTCACTCTCAC	54.72	20	141	[R]	General function prediction only	Molecular Function: protein binding (GO:0005515);; Cellular Component: extracellular region (GO:0005576);; Biological Process: proteolysis (GO:0006508);; Molecular Function: peptidase activity (GO:0008233);; Cellular Component: plastid (GO:0009536);;	--	Alpha/beta hydrolase domain-containing protein 17C OS=Danio rerio GN=abhd17c PE=2 SV=1	PREDICTED: abhydrolase domain-containing protein FAM108B1-like [Cucumis sativus]
CL9207Contig1	p4	(TGTA)6	24	301	325	CAAGAGTTATCTGCTCGTGAT	54.71	21	AAAGTTCCAAAGGTCCTCAT	55.29	20	145	[T]	Signal transduction mechanisms	Biological Process: G2/M transition of mitotic cell cycle (GO:0000086);; Cellular Component: protein phosphatase type 1 complex (GO:0000164);; Molecular Function: phosphoprotein phosphatase activity (GO:0004721);; Cellular Component: nucleolus (GO:0005730);; Biological Process: regulation of glycogen biosynthetic process (GO:0005979);; Biological Process: regulation of glycogen catabolic process …	K06269|0.0|vvi:100258649|hypothetical protein LOC100258649	Serine/threonine-protein phosphatase PP1 OS=Oryza sativa subsp. japonica GN=Os03g0268000 PE=2 SV=2	uncharacterized protein LOC100799218 [Glycine max]
CL9271Contig1	p3	(AGA)6	18	301	319	CTTTGATAGCAGACCAATGAG	55.15	21	ACCACTTTCACTTCTTCCAGT	55.45	21	148	[RTKL]	--	Molecular Function: protein serine/threonine kinase activity (GO:0004674);; Molecular Function: ATP binding (GO:0005524);; Cellular Component: nucleus (GO:0005634);; Cellular Component: vacuole (GO:0005773);; Biological Process: regulation of transcription, DNA-dependent (GO:0006355);; Biological Process: RNA processing (GO:0006396);; Biological Process: protein phosphorylation (GO:0006468);; Bio…	--	Protein kinase PINOID 2 OS=Oryza sativa subsp. japonica GN=PID2 PE=2 SV=1	protein kinase PINOID 2-like [Cucumis sativus]
CL9278Contig1	p3	(AGA)5	15	61	76	TGAATTCCAAGAGAAGTTGG	55.35	20	GCAAGAGTAGCCATAACTTCA	54.9	21	161	--	--	Molecular Function: peroxidase activity (GO:0004601);; Molecular Function: copper ion binding (GO:0005507);; Molecular Function: calcium ion binding (GO:0005509);; Molecular Function: ATP binding (GO:0005524);; Molecular Function: calcium-dependent phospholipid binding (GO:0005544);; Cellular Component: cell wall (GO:0005618);; Cellular Component: nuclear envelope (GO:0005635);; Cellular Componen…	--	Annexin-like protein RJ4 OS=Fragaria ananassa PE=2 SV=2	annexin [Cucumis melo subsp. melo]
CL9328Contig1	p3	(TCC)5	15	159	174	GATCCATCAAAGGAAGTCTCT	54.92	21	GGTTTTAGAATGAGGAGAGGA	55.12	21	144	[P]	Inorganic ion transport and metabolism	Biological Process: maltose metabolic process (GO:0000023);; Cellular Component: mitochondrion (GO:0005739);; Biological Process: pentose-phosphate shunt (GO:0006098);; Biological Process: rRNA processing (GO:0006364);; Biological Process: unsaturated fatty acid biosynthetic process (GO:0006636);; Cellular Component: chloroplast thylakoid membrane (GO:0009535);; Biological Process: response to bl…	--	Calcium sensing receptor, chloroplastic OS=Arabidopsis thaliana GN=CAS PE=1 SV=1	PREDICTED: calcium sensing receptor, chloroplastic-like [Cucumis sativus]
CL9359Contig1	p3	(CAA)5	15	301	316	AATAACAACAACAGCAGCAG	54.09	20	CGTGAAAAGGAGGAACATAG	54.97	20	156	--	--	Biological Process: immune effector process (GO:0002252);; Molecular Function: sequence-specific DNA binding transcription factor activity (GO:0003700);; Molecular Function: protein binding (GO:0005515);; Cellular Component: nucleus (GO:0005634);; Biological Process: amino acid transport (GO:0006865);; Biological Process: jasmonic acid mediated signaling pathway (GO:0009867);; Biological Process:…	--	Probable WRKY transcription factor 31 OS=Arabidopsis thaliana GN=WRKY31 PE=2 SV=1	PREDICTED: probable WRKY transcription factor 42-like [Cucumis sativus]
CL9453Contig1	p3	(TTC)6	18	96	114	CCCAAATCTTCCTTACACACT	55.83	21	GAGAGTGAAAATGGAGAAACC	55.42	21	132	--	--	Biological Process: transition metal ion transport (GO:0000041);; Cellular Component: extracellular region (GO:0005576);; Cellular Component: Golgi apparatus (GO:0005794);; Cellular Component: plasma membrane (GO:0005886);; Biological Process: microtubule nucleation (GO:0007020);; Biological Process: aging (GO:0007568);; Biological Process: regulation of cell size (GO:0008361);; Biological Proces…	--	Tetraspanin-8 OS=Arabidopsis thaliana GN=TET8 PE=2 SV=1	PREDICTED: uncharacterized protein LOC101213840 [Cucumis sativus]
CL9663Contig1	p3	(TCA)5	15	301	316	GTGATCACACAGGAAAATGTC	55.38	21	GTTCTACTTTTTCTCACCCTCA	55.29	22	156	--	--	Molecular Function: protein binding (GO:0005515);; Cellular Component: nucleus (GO:0005634);; Cellular Component: mitochondrial outer membrane (GO:0005741);; Cellular Component: mitochondrial inner membrane (GO:0005743);; Biological Process: mRNA export from nucleus (GO:0006406);; Biological Process: protein import into nucleus (GO:0006606);; Biological Process: protein targeting to mitochondrion…	--	Mitochondrial outer membrane import complex protein METAXIN OS=Arabidopsis thaliana GN=MTX1 PE=1 SV=1	PREDICTED: metaxin-2-like [Cucumis sativus]
CL9663Contig1	p3	(TCT)5	15	301	316	GCAAGCAGTAGGAAGAGAAA	54.99	20	AACCCTTCAAACCGAAAG	55.18	18	157	--	--	Molecular Function: protein binding (GO:0005515);; Cellular Component: nucleus (GO:0005634);; Cellular Component: mitochondrial outer membrane (GO:0005741);; Cellular Component: mitochondrial inner membrane (GO:0005743);; Biological Process: mRNA export from nucleus (GO:0006406);; Biological Process: protein import into nucleus (GO:0006606);; Biological Process: protein targeting to mitochondrion…	--	Mitochondrial outer membrane import complex protein METAXIN OS=Arabidopsis thaliana GN=MTX1 PE=1 SV=1	PREDICTED: metaxin-2-like [Cucumis sativus]
CL9824Contig1	p4	(CAAA)5	20	244	264	CACTAGCTTAGCTTCAGGAAA	54.41	21	ATGGGGAGACTGACTCATAAT	55.09	21	171	[D]	Cell cycle control, cell division, chromosome partitioning	Biological Process: microtubule cytoskeleton organization (GO:0000226);; Molecular Function: protein binding (GO:0005515);; Cellular Component: vacuolar membrane (GO:0005774);; Cellular Component: peroxisomal membrane (GO:0005778);; Cellular Component: cytosol (GO:0005829);; Biological Process: DNA metabolic process (GO:0006259);; Biological Process: intracellular protein transport (GO:0006886);;…	--	ELKS/Rab6-interacting/CAST family member 1 OS=Homo sapiens GN=ERC1 PE=1 SV=1	PREDICTED: uncharacterized protein LOC101216888 [Cucumis sativus]
CL9831Contig1	p3	(TCA)5	15	301	316	AGAGGTTTCCTCATTTAGACG	55.23	21	ACTTCCATCAGCAGCATAAC	55.4	20	158	--	--	Biological Process: MAPK cascade (GO:0000165);; Molecular Function: DNA binding (GO:0003677);; Molecular Function: sequence-specific DNA binding transcription factor activity (GO:0003700);; Molecular Function: protein binding (GO:0005515);; Cellular Component: nucleus (GO:0005634);; Cellular Component: mitochondrion (GO:0005739);; Biological Process: regulation of translation (GO:0006417);; Biolo…	--	Transcription factor TCP2 OS=Arabidopsis thaliana GN=TCP2 PE=2 SV=1	PREDICTED: LOW QUALITY PROTEIN: transcription factor TCP2-like [Cucumis sativus]
CL9919Contig1	p3	(CTT)6	18	301	319	GCTGCATGAGTTTTGGTC	55.04	18	AAGTCAAGCTAAAGCAAGAGG	55.76	21	152	--	--	Cellular Component: nucleus (GO:0005634);;	--	--	hypothetical protein PRUPE_ppa012217mg [Prunus persica]
CL9972Contig1	p2	(CT)8	16	44	60	ACCCAAGTTGATACGATTCTC	55.74	21	GGAGATTTCCTAAAACGAGAC	54.72	21	133	--	--	Biological Process: MAPK cascade (GO:0000165);; Biological Process: cytokinesis (GO:0000910);; Biological Process: cytokinesis by cell plate formation (GO:0000911);; Biological Process: respiratory burst involved in defense response (GO:0002679);; Molecular Function: SNAP receptor activity (GO:0005484);; Cellular Component: nucleus (GO:0005634);; Cellular Component: plasma membrane (GO:0005886);;…	--	SNAP25 homologous protein SNAP33 OS=Arabidopsis thaliana GN=SNAP33 PE=1 SV=1	PREDICTED: SNAP25 homologous protein SNAP33-like [Cucumis sativus]
CL10010Contig1	p3	(TTC)5	15	92	107	GGAAGAGGAATCATGAACAA	55.08	20	GATATTCCACCTGTGTCTGAA	55.05	21	167	--	--	Molecular Function: carboxylesterase activity (GO:0004091);; Molecular Function: cholinesterase activity (GO:0004104);; Molecular Function: alpha-L-fucosidase activity (GO:0004560);; Biological Process: lipid metabolic process (GO:0006629);; Cellular Component: plant-type cell wall (GO:0009505);; Cellular Component: plasmodesma (GO:0009506);; Cellular Component: chloroplast stroma (GO:0009570);; …	--	GDSL esterase/lipase At5g14450 OS=Arabidopsis thaliana GN=At5g14450 PE=2 SV=1	PREDICTED: GDSL esterase/lipase At3g27950-like [Cucumis sativus]
CL10015Contig1	p3	(GAA)5	15	301	316	TCGATTCACGCCTTTAATAC	55.5	20	TTCTCTCAGATCTCATCTTGC	54.69	21	138	[R]	General function prediction only	Cellular Component: cytosol (GO:0005829);; Biological Process: glucose catabolic process (GO:0006007);; Biological Process: N-terminal protein myristoylation (GO:0006499);; Biological Process: transport (GO:0006810);; Cellular Component: plasmodesma (GO:0009506);; Cellular Component: membrane (GO:0016020);; Biological Process: cellular component organization (GO:0016043);; Cellular Component: ER …	K14005|0.0|vvi:100263684|hypothetical protein LOC100263684	Protein transport protein SEC31 OS=Dictyostelium discoideum GN=sec31 PE=3 SV=1	PREDICTED: protein transport protein Sec31A-like [Cucumis sativus]
CL10043Contig1	p3	(CTC)5	15	57	72	CAGTTTCTTCCAGGACTTCTT	55.26	21	TAGAGCTACCGATGTTTACGA	55.35	21	108	--	--	Molecular Function: protein kinase activity (GO:0004672);; Molecular Function: binding (GO:0005488);; Biological Process: cellular process (GO:0009987);; Cellular Component: membrane (GO:0016020);; Molecular Function: kinase activity (GO:0016301);; Biological Process: reproductive process (GO:0022414);; Biological Process: cellular metabolic process (GO:0044237);; Cellular Component: cell part (G…	--	G-type lectin S-receptor-like serine/threonine-protein kinase RLK1 OS=Arabidopsis thaliana GN=RLK1 PE=2 SV=2	PREDICTED: G-type lectin S-receptor-like serine/threonine-protein kinase RLK1-like [Cucumis sativus]
CL10050Contig1	p3	(AAG)5	15	301	316	AGAAGGAACTCCTTGAGTAGC	54.53	21	CACTCACCGTTTCTAATTCTG	55.07	21	140	[RTKL]	--	Molecular Function: protein kinase activity (GO:0004672);; Molecular Function: protein binding (GO:0005515);; Molecular Function: ATP binding (GO:0005524);; Cellular Component: cytoplasm (GO:0005737);; Biological Process: protein phosphorylation (GO:0006468);; Biological Process: response to stress (GO:0006950);; Biological Process: cell surface receptor signaling pathway (GO:0007166);; Biologica…	--	E3 ubiquitin-protein ligase KEG OS=Arabidopsis thaliana GN=KEG PE=1 SV=2	PREDICTED: uncharacterized protein LOC101208616 [Cucumis sativus]
CL10055Contig1	p3	(AGA)6	18	301	319	GCACTGATCTCTGATCTATCG	55.03	21	CCCATCTCTCTCTGTTTTTCT	55.18	21	171	[RTKL]	--	Molecular Function: nucleotide binding (GO:0000166);; Molecular Function: actin binding (GO:0003779);; Molecular Function: calmodulin-dependent protein kinase activity (GO:0004683);; Molecular Function: receptor signaling protein serine/threonine kinase activity (GO:0004702);; Molecular Function: calcium-dependent protein serine/threonine phosphatase activity (GO:0004723);; Molecular Function: ca…	--	CDPK-related kinase 3 OS=Arabidopsis thaliana GN=CRK3 PE=1 SV=1	PREDICTED: CDPK-related protein kinase-like [Cucumis sativus]
CL10111Contig1	p2	(AG)10	20	301	321	CTCCAAATCAACACGAGTAAG	55.07	21	CGCATCTACAAAGTGAATAACC	56.54	22	152	--	--	Biological Process: polysaccharide biosynthetic process (GO:0000271);; Biological Process: RNA splicing, via endonucleolytic cleavage and ligation (GO:0000394);; Molecular Function: inositol hexakisphosphate binding (GO:0000822);; Biological Process: response to molecule of bacterial origin (GO:0002237);; Molecular Function: ubiquitin-protein ligase activity (GO:0004842);; Molecular Function: pro…	K14485|0.0|rcu:RCOM_0556140|TRANSPORT INHIBITOR RESPONSE 1 protein, putative	Protein TRANSPORT INHIBITOR RESPONSE 1 OS=Arabidopsis thaliana GN=TIR1 PE=1 SV=2	protein TRANSPORT INHIBITOR RESPONSE 1-like [Cucumis sativus]
CL10176Contig1	p2	(GA)8	16	39	49	CACACTCTTTTTACCCTTCG	55.06	20	CAAAAGTCATCTTCTCGGAAC	56.53	21	168	[C]	Energy production and conversion	Cellular Component: vacuolar proton-transporting V-type ATPase, V0 domain (GO:0000220);; Biological Process: cell morphogenesis (GO:0000902);; Biological Process: ossification (GO:0001503);; Cellular Component: nucleolus (GO:0005730);; Cellular Component: mitochondrion (GO:0005739);; Cellular Component: endosome (GO:0005768);; Cellular Component: trans-Golgi network (GO:0005802);; Biological Proc…	K02154|0.0|vvi:100250193|hypothetical protein LOC100250193	Vacuolar proton ATPase a1 OS=Arabidopsis thaliana GN=VHA-a1 PE=1 SV=1	PREDICTED: vacuolar proton ATPase a1-like [Cucumis sativus]
CL10208Contig1	p2	(AG)6	12	63	75	GAGACGATGACTGAAAGAAGA	54.6	21	AGTGTTGAGAGAACCGAGAAT	55.53	21	176	--	--	Cellular Component: cytosol (GO:0005829);; Biological Process: intra-Golgi vesicle-mediated transport (GO:0006891);; Biological Process: cellular membrane fusion (GO:0006944);; Cellular Component: Golgi transport complex (GO:0017119);; Cellular Component: Golgi apparatus part (GO:0044431);;	--	Conserved oligomeric Golgi complex subunit 6 OS=Homo sapiens GN=COG6 PE=1 SV=2	PREDICTED: conserved oligomeric Golgi complex subunit 6-like [Cucumis sativus]
CL10247Contig1	p4	(CCTT)5	20	235	255	CTTGATAGAAGGCTGAAGTGA	54.85	21	TCGAGTTGAGTTACAAAGGTC	54.59	21	165	[V]	Defense mechanisms	Molecular Function: ATP binding (GO:0005524);; Cellular Component: nucleus (GO:0005634);; Cellular Component: mitochondrion (GO:0005739);; Cellular Component: plasma membrane (GO:0005886);; Biological Process: ATP catabolic process (GO:0006200);; Biological Process: drug transmembrane transport (GO:0006855);; Biological Process: response to water deprivation (GO:0009414);; Cellular Component: chl…	--	ABC transporter G family member 22 OS=Arabidopsis thaliana GN=ABCG22 PE=1 SV=1	PREDICTED: ABC transporter G family member 22-like [Cucumis sativus]
CL10261Contig1	p3	(TAA)6	18	169	187	CTTCCTCTCCAAATACACACA	55.31	21	GATGGTGGTTGTTCAAGTTC	55.36	20	149	--	--	Molecular Function: hydrolase activity, hydrolyzing O-glycosyl compounds (GO:0004553);; Cellular Component: plasma membrane (GO:0005886);; Biological Process: sucrose biosynthetic process (GO:0005986);; Biological Process: galactose metabolic process (GO:0006012);; Biological Process: response to oxidative stress (GO:0006979);; Biological Process: response to water deprivation (GO:0009414);; Cell…	--	Probable galactinol--sucrose galactosyltransferase 5 OS=Arabidopsis thaliana GN=RFS5 PE=1 SV=1	PREDICTED: probable galactinol--sucrose galactosyltransferase 5-like [Cucumis sativus]
CL10265Contig1	p3	(TAC)5	15	301	316	CACGGGAATTACCCTTAGTAG	55.55	21	CGGATTTTAAGGATGAAGC	54.96	19	150	--	--	Molecular Function: 1-phosphatidylinositol binding (GO:0005545);; Cellular Component: nucleus (GO:0005634);; Cellular Component: cytosol (GO:0005829);; Cellular Component: plasma membrane (GO:0005886);; Biological Process: establishment or maintenance of cell polarity (GO:0007163);; Biological Process: neurotransmitter secretion (GO:0007269);; Biological Process: axonogenesis (GO:0007409);; Cellu…	--	Putative clathrin assembly protein At2g25430 OS=Arabidopsis thaliana GN=At2g25430 PE=1 SV=2	PREDICTED: putative clathrin assembly protein At2g25430-like [Cucumis sativus]
CL10468Contig1	p3	(ATA)5	15	26	41	GGCTTGCTACCAAATCTTATG	56.61	21	CATATGCTCTCTTGTTGCCTA	55.76	21	124	[RTKL]	--	Biological Process: activation of MAPKK activity (GO:0000186);; Molecular Function: transmembrane receptor protein serine/threonine kinase activity (GO:0004675);; Molecular Function: MAP kinase kinase kinase activity (GO:0004709);; Molecular Function: protein binding (GO:0005515);; Molecular Function: ATP binding (GO:0005524);; Cellular Component: plasma membrane (GO:0005886);; Biological Process…	--	Probable receptor protein kinase TMK1 OS=Arabidopsis thaliana GN=TMK1 PE=1 SV=1	PREDICTED: probable receptor protein kinase TMK1-like [Cucumis sativus]
CL10492Contig1	p3	(GAT)5	15	301	316	TCACTCATCGAGATTACATGG	56.13	21	ACAATGGGCATCAATATAGG	54.98	20	153	--	--	Biological Process: protein import into nucleus, docking (GO:0000059);; Biological Process: protein import into nucleus, translocation (GO:0000060);; Biological Process: cytokinesis (GO:0000910);; Cellular Component: nuclear pore (GO:0005643);; Cellular Component: nucleoplasm (GO:0005654);; Cellular Component: cytosol (GO:0005829);; Biological Process: protein N-linked glycosylation (GO:0006487);…	--	Transportin-1 OS=Arabidopsis thaliana GN=TRN1 PE=1 SV=1	PREDICTED: transportin-1-like [Cucumis sativus]
CL10514Contig1	p3	(ACA)6	18	301	319	AAGAAACTGACCTAACCATCC	54.9	21	GCAACGTTGGTATTGCTATT	55.44	20	148	[H]	Coenzyme transport and metabolism	Biological Process: karyogamy (GO:0000741);; Molecular Function: aspartic-type endopeptidase activity (GO:0004190);; Molecular Function: ubiquitin activating enzyme activity (GO:0004839);; Molecular Function: ubiquitin-protein ligase activity (GO:0004842);; Molecular Function: protein binding (GO:0005515);; Molecular Function: ATP binding (GO:0005524);; Cellular Component: nucleus (GO:0005634);; …	K03178|0.0|vvi:100232964|ubiquitin-activating enzyme	Ubiquitin-activating enzyme E1 1 OS=Arabidopsis thaliana GN=UBA1 PE=1 SV=1	PREDICTED: ubiquitin-activating enzyme E1 2-like [Cucumis sativus]
CL10523Contig1	p3	(GCC)5	15	301	316	AAATCAGGCTGAGAGAAAGAG	55.5	21	GTGATGTCGGTTCAAAGC	54.85	18	157	[O]	Posttranslational modification, protein turnover, chaperones	Cellular Component: histone acetyltransferase complex (GO:0000123);; Molecular Function: protein binding (GO:0005515);; Molecular Function: phosphatidylinositol-3,4,5-trisphosphate binding (GO:0005547);; Cellular Component: nucleus (GO:0005634);; Cellular Component: nucleolus (GO:0005730);; Cellular Component: centrosome (GO:0005813);; Cellular Component: cytosol (GO:0005829);; Cellular Component…	K09667|0.0|rcu:RCOM_0611050|o-linked n-acetylglucosamine transferase, ogt, putative	Probable UDP-N-acetylglucosamine--peptide N-acetylglucosaminyltransferase SEC OS=Arabidopsis thaliana GN=SEC PE=2 SV=1	PREDICTED: probable UDP-N-acetylglucosamine--peptide N-acetylglucosaminyltransferase SEC-like [Cucumis sativus]
CL10534Contig1	p3	(CAG)5	15	301	316	GAGAGAGGAGGATTAGCATTC	54.77	21	TAAGGAAGCAGAAAGAGAGAC	53.23	21	128	[J]	Translation, ribosomal structure and biogenesis	Molecular Function: RNA binding (GO:0003723);; Molecular Function: mRNA 3'-UTR binding (GO:0003730);; Molecular Function: protein binding (GO:0005515);; Cellular Component: cytosol (GO:0005829);; Cellular Component: plasma membrane (GO:0005886);; Biological Process: cellular process (GO:0009987);; Cellular Component: perinuclear region of cytoplasm (GO:0048471);;	--	Pumilio homolog 1 OS=Arabidopsis thaliana GN=APUM1 PE=1 SV=1	PREDICTED: pumilio homolog 1-like [Cucumis sativus]
CL10547Contig1	p2	(CT)7	14	301	315	GGAAAATACTTGTTGGCTCTC	55.62	21	GCAGCAAGCTATAGTCAAACT	54.26	21	149	--	--	Cellular Component: ubiquitin ligase complex (GO:0000151);; Biological Process: regulation of heart rate (GO:0002027);; Biological Process: heart morphogenesis (GO:0003007);; Molecular Function: DNA binding (GO:0003677);; Molecular Function: RNA binding (GO:0003723);; Molecular Function: helicase activity (GO:0004386);; Molecular Function: intracellular ligand-gated calcium channel activity (GO:0…	K12169|0.0|vvi:100250977|hypothetical protein LOC100250977	E3 ubiquitin-protein ligase RKP OS=Arabidopsis thaliana GN=RKP PE=2 SV=2	PREDICTED: E3 ubiquitin-protein ligase RKP-like [Cucumis sativus]
CL10591Contig1	p3	(GAA)6	18	301	319	CGGATAAATGAGAGAGAATCC	55.48	21	CAGGAAACACAACCAAATCT	55.12	20	150	[R]	General function prediction only	Molecular Function: nucleotide binding (GO:0000166);; Biological Process: cytokinesis by cell plate formation (GO:0000911);; Molecular Function: RNA polymerase III type 1 promoter DNA binding (GO:0001030);; Molecular Function: RNA polymerase III type 2 promoter DNA binding (GO:0001031);; Molecular Function: RNA polymerase III type 3 promoter DNA binding (GO:0001032);; Molecular Function: TFIIIC-c…	K07204|0.0|pop:POPTR_762562|hypothetical protein	Regulatory-associated protein of TOR 1 OS=Arabidopsis thaliana GN=RAPTOR1 PE=1 SV=1	PREDICTED: regulatory-associated protein of TOR 1-like [Cucumis sativus]
CL10652Contig1	p3	(GAA)5	15	301	316	AGGTAAGACGATAACCCTGAC	54.94	21	GAGTATTCGAATTTGCTTCG	55.22	20	148	[G]	Carbohydrate transport and metabolism	Biological Process: heart morphogenesis (GO:0003007);; Molecular Function: alpha-glucosidase activity (GO:0004558);; Cellular Component: lysosome (GO:0005764);; Cellular Component: cytosol (GO:0005829);; Biological Process: glycogen metabolic process (GO:0005977);; Biological Process: starch metabolic process (GO:0005982);; Biological Process: striated muscle contraction (GO:0006941);; Biological…	--	Alpha-xylosidase 1 OS=Arabidopsis thaliana GN=XYL1 PE=1 SV=1	PREDICTED: alpha-xylosidase 1-like [Cucumis sativus]
CL10688Contig1	p2	(AT)6	12	301	313	CAGATACCTCTTTTTCACTGC	54.28	21	CTCCAAAAGATAACTCCAGGT	55.07	21	177	--	--	Molecular Function: phosphatidylinositol-4,5-bisphosphate 5-phosphatase activity (GO:0004439);; Cellular Component: nucleus (GO:0005634);; Cellular Component: Golgi apparatus (GO:0005794);; Biological Process: protein N-linked glycosylation (GO:0006487);; Biological Process: vacuole organization (GO:0007033);; Biological Process: cell adhesion (GO:0007155);; Biological Process: locomotory behavio…	--	Phosphoinositide phosphatase SAC2 OS=Arabidopsis thaliana GN=SAC2 PE=2 SV=1	PREDICTED: polyphosphoinositide phosphatase-like [Cucumis sativus]
CL10738Contig1	p2	(CT)8	16	23	39	CAAATTCCTTCGTCGTCTC	55.79	19	TCTTCCTTAAGTTGCCTCATC	56.19	21	145	--	--	Molecular Function: DNA binding (GO:0003677);; Cellular Component: intracellular membrane-bounded organelle (GO:0043231);;	--	--	conserved hypothetical protein [Ricinus communis]
CL10834Contig1	p2	(CT)7	14	75	89	AACAAGGGTTCTCTCTCTCAC	55.07	21	GAGTTATCAGATCCTTGGACA	54.24	21	160	[R]	General function prediction only	Molecular Function: binding (GO:0005488);; Biological Process: transcription, DNA-dependent (GO:0006351);; Biological Process: cell surface receptor signaling pathway (GO:0007166);; Biological Process: anatomical structure morphogenesis (GO:0009653);; Biological Process: response to abscisic acid stimulus (GO:0009737);; Biological Process: regulation of gene expression (GO:0010468);; Biological P…	--	PHD finger protein rhinoceros OS=Drosophila melanogaster GN=rno PE=1 SV=1	PREDICTED: uncharacterized protein LOC101216765 [Cucumis sativus]
CL10889Contig1	p4	(AATC)5	20	301	321	TGGGCGGATACCAATTAT	56.24	18	CGTTTGTTTCCTGAGAAAGT	54.58	20	170	--	--	--	--	Putative FBD-associated F-box protein At5g22720 OS=Arabidopsis thaliana GN=At5g22720 PE=2 SV=2	PREDICTED: uncharacterized protein LOC101224445 [Cucumis sativus]
CL10909Contig1	p3	(TGT)7	21	301	322	AGATACAACAAGCATCAGCAG	55.67	21	TGACGATTATCAGATCGTAGC	55.51	21	150	--	--	Biological Process: regionalization (GO:0003002);; Molecular Function: sequence-specific DNA binding transcription factor activity (GO:0003700);; Molecular Function: binding (GO:0005488);; Cellular Component: nucleus (GO:0005634);; Biological Process: regulation of transcription, DNA-dependent (GO:0006355);; Biological Process: regulation of flower development (GO:0009909);; Biological Process: r…	--	Trihelix transcription factor GT-2 OS=Arabidopsis thaliana GN=GT-2 PE=2 SV=1	PREDICTED: trihelix transcription factor GT-2-like [Cucumis sativus]
CL10935Contig1	p3	(TTC)5	15	301	316	GGTTTCCCAAAACTCAATCT	55.7	20	GATGGTGTCGAGACTACAAAA	55.3	21	148	[J]	Translation, ribosomal structure and biogenesis	Biological Process: rRNA modification (GO:0000154);; Biological Process: maturation of SSU-rRNA from tricistronic rRNA transcript (SSU-rRNA, 5.8S rRNA, LSU-rRNA) (GO:0000462);; Biological Process: endonucleolytic cleavage of tricistronic rRNA transcript (SSU-rRNA, 5.8S rRNA, LSU-rRNA) (GO:0000479);; Biological Process: RNA methylation (GO:0001510);; Molecular Function: DNA binding (GO:0003677);; …	K14565|0.0|pop:POPTR_1096439|hypothetical protein	Probable nucleolar protein 5-2 OS=Arabidopsis thaliana GN=NOP5-2 PE=2 SV=1	MAR-binding protein [Cucumis melo subsp. melo]
CL10969Contig1	p3	(TGA)6	18	301	319	TAGCCTGGACAAGTTCACTAC	54.63	21	CAATTTCCTCCTCTCTTTAGC	55.04	21	150	--	--	--	--	Protein notum homolog OS=Mus musculus GN=Notum PE=2 SV=2	PREDICTED: protein notum homolog [Fragaria vesca subsp. vesca]
CL10998Contig1	p3	(GAA)5	15	301	316	GTCGCGAGAATTATGAAGAT	54.54	20	AGCTTGCAGTGATCAGAAAT	55.09	20	155	[M]	Cell wall/membrane/envelope biogenesis	Cellular Component: extracellular region (GO:0005576);; Cellular Component: mitochondrion (GO:0005739);; Biological Process: proteolysis (GO:0006508);; Biological Process: phosphatidylglycerol biosynthetic process (GO:0006655);; Molecular Function: peptidase activity (GO:0008233);; Molecular Function: serine-type peptidase activity (GO:0008236);; Cellular Component: plastid (GO:0009536);; Cellula…	--	C-terminal processing peptidase, chloroplastic OS=Scenedesmus obliquus GN=ctpA PE=1 SV=1	PREDICTED: C-terminal processing peptidase, chloroplastic-like [Cucumis sativus]
CL11038Contig1	p2	(AG)8	16	301	317	TGAGCTTTCGTAGATCAAGAG	55.02	21	ACTCTTTTGTTGCTTTCTGC	54.9	20	123	--	--	Biological Process: polysaccharide biosynthetic process (GO:0000271);; Molecular Function: sequence-specific DNA binding transcription factor activity (GO:0003700);; Molecular Function: acid phosphatase activity (GO:0003993);; Cellular Component: nucleus (GO:0005634);; Cellular Component: mitochondrion (GO:0005739);; Cellular Component: endosome (GO:0005768);; Cellular Component: Golgi apparatus …	--	Auxin-responsive protein IAA9 OS=Arabidopsis thaliana GN=IAA9 PE=1 SV=1	PREDICTED: auxin-responsive protein IAA9-like [Cucumis sativus]
CL11064Contig1	p3	(TTC)5	15	147	162	CGTTAGCTCATCTCCTCATAA	54.83	21	GATCTTAACTTGAGGCATTCTG	55.79	22	152	[KL]	--	Biological Process: RNA splicing, via endonucleolytic cleavage and ligation (GO:0000394);; Cellular Component: core TFIIH complex (GO:0000439);; Molecular Function: ATP-dependent DNA helicase activity (GO:0004003);; Molecular Function: protein binding (GO:0005515);; Cellular Component: holo TFIIH complex (GO:0005675);; Biological Process: nucleotide-excision repair (GO:0006289);; Biological Proce…	K03144|0.0|rcu:RCOM_0936010|tfiih, polypeptide, putative	General transcription factor IIH subunit 4 OS=Pan troglodytes GN=GTF2H4 PE=3 SV=1	PREDICTED: general transcription factor IIH subunit 4-like [Cucumis sativus]
CL11103Contig1	p3	(GCT)5	15	301	316	TGAAGTTGTTGAAGTTGCTG	54.98	20	TGATAATGGAAAAGGAGGTG	55.15	20	156	--	--	Molecular Function: protein binding (GO:0005515);; Cellular Component: cytoskeleton (GO:0005856);; Cellular Component: plasma membrane (GO:0005886);; Biological Process: actin filament organization (GO:0007015);; Cellular Component: plasmodesma (GO:0009506);; Biological Process: cellular component assembly (GO:0022607);; Biological Process: cell differentiation (GO:0030154);; Cellular Component: …	--	Histidine-rich glycoprotein OS=Plasmodium lophurae PE=4 SV=1	PREDICTED: uncharacterized LOC101204739 [Cucumis sativus]
CL11136Contig1	p3	(AAG)7	21	211	232	GGGTGGTCCATATTATCACTT	55.39	21	ATCTCCAAGAAAGACTCCAAC	55.01	21	166	[S]	Function unknown	Molecular Function: nucleotide binding (GO:0000166);; Cellular Component: cell wall (GO:0005618);; Cellular Component: mitochondrion (GO:0005739);; Cellular Component: vacuolar membrane (GO:0005774);; Cellular Component: lipid particle (GO:0005811);; Cellular Component: plasma membrane (GO:0005886);; Biological Process: chromatin assembly or disassembly (GO:0006333);; Biological Process: circadia…	--	Probable mitochondrial saccharopine dehydrogenase-like oxidoreductase At5g39410 OS=Arabidopsis thaliana GN=At5g39410 PE=1 SV=2	conserved hypothetical protein [Ricinus communis]
CL11142Contig1	p3	(AAG)5	15	301	316	GAAAGACGTTTTCTTGTTGG	55.01	20	GCCATTTTATCTCACTCTCCT	55.14	21	141	[E]	Amino acid transport and metabolism	Molecular Function: acetolactate synthase activity (GO:0003984);; Cellular Component: cell wall (GO:0005618);; Cellular Component: cytosol (GO:0005829);; Cellular Component: plasma membrane (GO:0005886);; Biological Process: gluconeogenesis (GO:0006094);; Biological Process: leucine metabolic process (GO:0006551);; Biological Process: valine metabolic process (GO:0006573);; Biological Process: cy…	K01653|0.0|rcu:RCOM_0605940|acetolactate synthase, putative (EC:2.2.1.6)	Acetolactate synthase small subunit 2, chloroplastic OS=Arabidopsis thaliana GN=At2g31810 PE=1 SV=1	PREDICTED: uncharacterized protein LOC101212902 [Cucumis sativus]
CL11214Contig1	p3	(TGT)5	15	301	316	GATGTAGCCTTTGGAAGTTCT	55.22	21	CCACGATCTCTATCTGTTACG	55.02	21	151	--	--	Biological Process: cellular process (GO:0009987);;	--	--	PREDICTED: uncharacterized protein LOC101220689 isoform 1 [Cucumis sativus]
CL11220Contig1	p2	(GA)6	12	301	313	GTTCTGATTGAAGACCACTTG	54.83	21	TCAACTTTCCCTCTCTAGCTT	55.11	21	157	--	--	Molecular Function: protein binding (GO:0005515);; Cellular Component: cytoplasm (GO:0005737);; Biological Process: cellular protein modification process (GO:0006464);; Biological Process: signal transduction (GO:0007165);; Biological Process: response to abiotic stimulus (GO:0009628);; Biological Process: post-embryonic development (GO:0009791);; Biological Process: defense response, incompatibl…	--	U-box domain-containing protein 4 OS=Arabidopsis thaliana GN=PUB4 PE=1 SV=3	PREDICTED: U-box domain-containing protein 10-like [Cucumis sativus]
CL11260Contig1	p4	(GTTC)5	20	301	321	AGTTTGGAAGGGAGAATGAT	55.21	20	CTTTGTTCGTTTCGTCTTCT	54.75	20	123	[O]	Posttranslational modification, protein turnover, chaperones	Cellular Component: immunological synapse (GO:0001772);; Molecular Function: receptor binding (GO:0005102);; Cellular Component: extracellular region (GO:0005576);; Cellular Component: cell wall (GO:0005618);; Cellular Component: mitochondrion (GO:0005739);; Cellular Component: mitochondrial inner membrane (GO:0005743);; Cellular Component: mitochondrial intermembrane space (GO:0005758);; Biologi…	--	Stomatin-like protein 2, mitochondrial OS=Homo sapiens GN=STOML2 PE=1 SV=1	PREDICTED: uncharacterized protein C16G5.07c-like [Cucumis sativus]
CL11278Contig1	p2	(GA)7	14	301	315	CAACTCAAACCGTCGATTAT	55.25	20	CGATAAGGTTTCTTCCATTG	54.91	20	150	[H]	Coenzyme transport and metabolism	Molecular Function: porphobilinogen synthase activity (GO:0004655);; Cellular Component: endoplasmic reticulum (GO:0005783);; Cellular Component: Golgi apparatus (GO:0005794);; Biological Process: pentose-phosphate shunt (GO:0006098);; Biological Process: rRNA processing (GO:0006364);; Biological Process: proteolysis (GO:0006508);; Biological Process: protoporphyrinogen IX biosynthetic process (G…	K01698|0.0|rcu:RCOM_1030560|porphobilinogen synthase, putative (EC:4.2.1.24)	Delta-aminolevulinic acid dehydratase 1, chloroplastic OS=Arabidopsis thaliana GN=HEMB1 PE=2 SV=1	PREDICTED: delta-aminolevulinic acid dehydratase, chloroplastic-like [Cucumis sativus]
CL11302Contig1	p2	(TA)7	14	186	200	GATTTCAGCTCCAAGTTTTC	54.13	20	ATCAGTTCCGCTACTGTCATA	55.01	21	182	--	--	--	--	DNA mismatch repair protein MSH6 OS=Arabidopsis thaliana GN=MSH6 PE=1 SV=2	PREDICTED: uncharacterized protein LOC101221359 [Cucumis sativus]
CL11357Contig1	p2	(TC)8	16	202	218	TTCCCCTCTTTCTCTCTCTTA	55	21	CGAATTGAGGTAGCAGAAGAT	56.22	21	177	[KAD]	--	Biological Process: cell fate specification (GO:0001708);; Molecular Function: DNA binding (GO:0003677);; Molecular Function: chromatin binding (GO:0003682);; Molecular Function: sequence-specific DNA binding transcription factor activity (GO:0003700);; Molecular Function: binding (GO:0005488);; Molecular Function: protein binding (GO:0005515);; Cellular Component: nucleus (GO:0005634);; Biologic…	K09422|0.0|rcu:RCOM_0622120|r2r3-myb transcription factor, putative	Transcription factor GAMYB OS=Oryza sativa subsp. japonica GN=GAM1 PE=2 SV=1	PREDICTED: transcription factor GAMYB-like [Cucumis sativus]
CL11383Contig1	p2	(TA)6	12	264	276	CACTGTCCGAAAGATTATCAC	54.8	21	GAACCCATCTTTCCTCAGTAT	54.82	21	113	[G]	Carbohydrate transport and metabolism	Cellular Component: vacuole (GO:0005773);; Molecular Function: xylan 1,4-beta-xylosidase activity (GO:0009044);; Cellular Component: plant-type cell wall (GO:0009505);; Biological Process: glucuronoxylan metabolic process (GO:0010413);; Biological Process: arabinose metabolic process (GO:0019566);; Biological Process: xylan biosynthetic process (GO:0045492);; Biological Process: xylan catabolic p…	--	Alpha-L-arabinofuranosidase 1 OS=Arabidopsis thaliana GN=ASD1 PE=1 SV=1	PREDICTED: LOW QUALITY PROTEIN: alpha-L-arabinofuranosidase 1-like [Cucumis sativus]
CL11494Contig1	p3	(ATT)5	15	301	316	AACTCCATAGGTACCTTCACC	54.78	21	TCCTTTGTTTCTGTTTCTGG	55.43	20	145	[RTKL]	--	Biological Process: G1/S transition of mitotic cell cycle (GO:0000082);; Biological Process: nuclear division (GO:0000280);; Biological Process: RNA splicing, via endonucleolytic cleavage and ligation (GO:0000394);; Biological Process: nucleotide-excision repair, DNA damage removal (GO:0000718);; Biological Process: cytokinesis by cell plate formation (GO:0000911);; Molecular Function: transcript…	K02202|0.0|vvi:100247566|hypothetical protein LOC100247566	Cyclin-dependent kinase D-1 OS=Oryza sativa subsp. japonica GN=CDKD-1 PE=1 SV=1	PREDICTED: cyclin-dependent kinase D-1-like [Cucumis sativus]
CL11582Contig1	p2	(TA)7	14	231	245	GACTCTTCAGTAACCCAGGAT	54.88	21	TATCGTGACAACTCTTGTTCC	55.3	21	148	[C]	Energy production and conversion	Biological Process: polysaccharide biosynthetic process (GO:0000271);; Biological Process: polysaccharide catabolic process (GO:0000272);; Cellular Component: mitochondrial inner membrane (GO:0005743);; Cellular Component: mitochondrial respiratory chain complex III (GO:0005750);; Biological Process: starch metabolic process (GO:0005982);; Biological Process: glycolysis (GO:0006096);; Biological …	K00412|0.0|pop:POPTR_593309|hypothetical protein	Cytochrome b OS=Arabidopsis thaliana GN=MT-CYB PE=2 SV=2	apocytochrome b [Cucurbita pepo]
CL12871Contig1	p3	(GAA)5	15	301	316	TGAAACACCTGAGGACTACAT	54.69	21	TAATGGATGGATTAGGGTTG	54.95	20	150	--	--	Cellular Component: nucleus (GO:0005634);;	--	--	PREDICTED: uncharacterized protein LOC101220969 [Cucumis sativus]
CL13249Contig1	p3	(CAA)7	21	301	322	ACGTCACTGTCAATTTCCTT	54.67	20	AATCCCACTATTGCTCCTAAG	55.2	21	150	--	--	Biological Process: respiratory burst involved in defense response (GO:0002679);; Molecular Function: sequence-specific DNA binding transcription factor activity (GO:0003700);; Molecular Function: calmodulin binding (GO:0005516);; Cellular Component: nucleus (GO:0005634);; Biological Process: regulation of transcription, DNA-dependent (GO:0006355);; Biological Process: protein folding (GO:0006457…	--	Probable WRKY transcription factor 21 OS=Arabidopsis thaliana GN=WRKY21 PE=2 SV=1	PREDICTED: probable WRKY transcription factor 21-like isoform 2 [Fragaria vesca subsp. vesca]
CL13257Contig1	p2	(AG)6	12	67	79	CCACACTCAAAAGAGAGAGAA	54.71	21	GCTTCTTCATCTGTTATCACC	54.01	21	155	--	--	Cellular Component: membrane (GO:0016020);;	--	--	PREDICTED: uncharacterized protein LOC101206442 [Cucumis sativus]
CL13308Contig1	p3	(CTT)5	15	301	316	AGACTCGATAACGGTTCTCTT	54.81	21	GAAAAAGCCCTAACCAAGAA	56.16	20	124	[O]	Posttranslational modification, protein turnover, chaperones	Cellular Component: proteasome complex (GO:0000502);; Biological Process: antigen processing and presentation of peptide antigen via MHC class I (GO:0002474);; Molecular Function: protein binding (GO:0005515);; Cellular Component: nucleus (GO:0005634);; Cellular Component: proteasome regulatory particle (GO:0005838);; Biological Process: apoptotic process (GO:0006915);; Biological Process: cellul…	K06693|3e-94|vvi:100258659|hypothetical protein LOC100258659	26S proteasome non-ATPase regulatory subunit 9 OS=Homo sapiens GN=PSMD9 PE=1 SV=3	PREDICTED: 26S proteasome non-ATPase regulatory subunit 9-like [Cucumis sativus]
CL13374Contig1	p2	(CT)6	12	232	244	CATTTTCTTCCTCCTCACTCT	55.18	21	GAAAGAAGGAAGCTTTGAGAC	55.06	21	197	--	--	--	--	Putative protein TPRXL OS=Homo sapiens GN=TPRXL PE=5 SV=2	hypothetical protein PRUPE_ppa024378mg [Prunus persica]
CL13552Contig1	p2	(AG)6	12	93	105	GATCGGAATTCGTGGTTT	55.83	18	TCTGATACTTCTCTCCCCATT	55.39	21	112	--	--	Molecular Function: transporter activity (GO:0005215);; Cellular Component: Golgi apparatus (GO:0005794);; Biological Process: response to abscisic acid stimulus (GO:0009737);; Biological Process: vesicle-mediated transport (GO:0016192);; Biological Process: pollen tube development (GO:0048868);;	--	Trafficking protein particle complex subunit 6B OS=Homo sapiens GN=TRAPPC6B PE=1 SV=1	PREDICTED: trafficking protein particle complex subunit 6B-like [Cucumis sativus]
CL13629Contig1	p3	(CTT)5	15	301	316	GATGGAATTCTACTGCCAAA	55.3	20	CAAACCCATCAAAAGAGAGA	55.35	20	160	--	--	Molecular Function: sequence-specific DNA binding transcription factor activity (GO:0003700);; Molecular Function: protein binding (GO:0005515);; Cellular Component: nucleus (GO:0005634);; Biological Process: regulation of transcription, DNA-dependent (GO:0006355);; Biological Process: signal transduction (GO:0007165);; Biological Process: positive regulation of cell proliferation (GO:0008284);; …	--	WUSCHEL-related homeobox 4 OS=Arabidopsis thaliana GN=WOX4 PE=2 SV=1	transcription factor, putative [Ricinus communis]
CL13641Contig1	p3	(GAA)5	15	301	316	AATTTCGACTCATCCCTCTT	55.37	20	GAGAAAGTCTAATGTGCATGG	54.97	21	141	--	--	Molecular Function: protein kinase activity (GO:0004672);; Cellular Component: nucleus (GO:0005634);; Cellular Component: mitochondrion (GO:0005739);; Cellular Component: cytosol (GO:0005829);; Biological Process: postreplication repair (GO:0006301);; Biological Process: calcium ion transport (GO:0006816);; Biological Process: water transport (GO:0006833);; Biological Process: apoptotic process (…	--	BAG family molecular chaperone regulator 3 OS=Arabidopsis thaliana GN=BAG3 PE=1 SV=1	PREDICTED: BAG family molecular chaperone regulator 3-like [Cucumis sativus]
CL13660Contig1	p2	(CT)10	20	114	134	GGTTCTTTCCACTCCAAATA	54.28	20	GAGTAATGGAGTGACAGGTGA	55.11	21	140	--	--	Molecular Function: DNA binding (GO:0003677);; Molecular Function: sequence-specific DNA binding transcription factor activity (GO:0003700);; Cellular Component: nucleus (GO:0005634);; Biological Process: transcription, DNA-dependent (GO:0006351);; Biological Process: protein targeting to membrane (GO:0006612);; Biological Process: fatty acid catabolic process (GO:0009062);; Cellular Component: p…	K09287|1e-153|vvi:100262843|hypothetical protein LOC100262843	AP2/ERF and B3 domain-containing transcription factor RAV1 OS=Arabidopsis thaliana GN=RAV1 PE=1 SV=1	PREDICTED: AP2/ERF and B3 domain-containing transcription repressor TEM1-like [Vitis vinifera]
CL13714Contig1	p3	(CAA)7	21	301	322	CCGCTACCGATAACAATAAC	54.99	20	GAACATATTCGACGCTGTG	55.12	19	161	--	--	Molecular Function: binding (GO:0005488);; Biological Process: regulation of transcription, DNA-dependent (GO:0006355);; Biological Process: response to abiotic stimulus (GO:0009628);; Biological Process: post-embryonic development (GO:0009791);; Biological Process: cellular process (GO:0009987);; Biological Process: regulation of meristem growth (GO:0010075);; Biological Process: cellular respon…	--	Zinc finger protein MAGPIE OS=Arabidopsis thaliana GN=MGP PE=1 SV=1	PREDICTED: uncharacterized protein LOC101219959 [Cucumis sativus]
CL13948Contig1	p3	(GAA)5	15	301	316	GAAGTATTGCTAGGCCTTCAT	55.34	21	ACAAGTTCTGCACACTCTGAT	54.92	21	145	[I]	Lipid transport and metabolism	Cellular Component: nucleus (GO:0005634);;	--	F-box protein At5g50450 OS=Arabidopsis thaliana GN=At5g50450 PE=2 SV=1	PREDICTED: F-box protein At1g67340-like [Cucumis sativus]
CL14396Contig1	p3	(GAT)6	18	301	319	AGATGACGATGATGACGAAG	56.13	20	CTGGTTCAAAGTCACTCACAT	55.2	21	149	--	--	Biological Process: respiratory burst involved in defense response (GO:0002679);; Molecular Function: DNA binding (GO:0003677);; Molecular Function: sequence-specific DNA binding transcription factor activity (GO:0003700);; Cellular Component: nucleus (GO:0005634);; Biological Process: asymmetric cell division (GO:0008356);; Biological Process: toxin catabolic process (GO:0009407);; Biological Pr…	--	Heat shock factor protein HSF24 OS=Solanum peruvianum GN=HSF24 PE=2 SV=1	Heat shock factor 4 [Theobroma cacao]
CL14436Contig1	p3	(CAT)5	15	301	316	CTCTCTCAATCATAGCCACAC	54.95	21	GTTGGAAGGGTATTTAGAGGA	55.01	21	137	--	--	--	--	--	PREDICTED: uncharacterized protein LOC101204059 [Cucumis sativus]
CL14596Contig1	p3	(TTC)5	15	301	316	TTGTGGTCTTCTTCTTCTCAC	54.52	21	ACTCACAGTTTGTTTCCTTCC	55.87	21	135	[O]	Posttranslational modification, protein turnover, chaperones	Molecular Function: ATP binding (GO:0005524);; Cellular Component: cell wall (GO:0005618);; Cellular Component: polytene chromosome interband (GO:0005705);; Cellular Component: mitochondrion (GO:0005739);; Cellular Component: vacuolar membrane (GO:0005774);; Cellular Component: endoplasmic reticulum (GO:0005783);; Cellular Component: Golgi apparatus (GO:0005794);; Cellular Component: lipid partic…	K04079|0.0|vvi:100264968|hypothetical protein LOC100264968	Heat shock protein 83 OS=Ipomoea nil GN=HSP83A PE=2 SV=1	PREDICTED: heat shock protein 83-like [Cucumis sativus]
CL14733Contig1	p2	(CT)6	12	301	313	GTTCAGAACTGTGTTGGAGAA	55.34	21	GCAATTGATGATTGGAGAAG	55.72	20	148	--	--	--	--	--	Disease resistance protein RPS2, putative [Ricinus communis]
CL14740Contig1	p2	(TC)7	14	301	315	GTTTCCTTCTCTTTGCTAACC	54.96	21	GTAATGATGAAATCGGTGGT	54.82	20	145	--	--	Molecular Function: binding (GO:0005488);; Biological Process: transcription, DNA-dependent (GO:0006351);; Cellular Component: nuclear lumen (GO:0031981);; Biological Process: developmental process (GO:0032502);; Cellular Component: intracellular membrane-bounded organelle (GO:0043231);; Cellular Component: intracellular non-membrane-bounded organelle (GO:0043232);; Cellular Component: cytoplasmi…	--	Spore wall protein 2 OS=Encephalitozoon intestinalis GN=SWP2 PE=1 SV=1	PREDICTED: uncharacterized protein LOC101230130 [Cucumis sativus]
CL14783Contig1	p3	(TCT)5	15	301	316	GAGAAGATTGATCATCCCAAG	56.23	21	GAAGAAGATGGTATGAATGGAG	55.41	22	148	--	--	Molecular Function: two-component response regulator activity (GO:0000156);; Biological Process: two-component signal transduction system (phosphorelay) (GO:0000160);; Molecular Function: DNA binding (GO:0003677);; Molecular Function: sequence-specific DNA binding transcription factor activity (GO:0003700);; Cellular Component: nucleolus (GO:0005730);; Cellular Component: mitochondrion (GO:000573…	--	Zinc finger protein CONSTANS-LIKE 16 OS=Arabidopsis thaliana GN=COL16 PE=2 SV=2	PREDICTED: zinc finger protein CONSTANS-LIKE 16-like [Cucumis sativus]
CL14847Contig1	p2	(CT)6	12	301	313	AGCTATGCTTTAACGTCACTG	55.02	21	CTGATGAAAAAGCTTCGAGA	55.84	20	149	[KAD]	--	Molecular Function: DNA binding (GO:0003677);; Molecular Function: chromatin binding (GO:0003682);; Molecular Function: sequence-specific DNA binding transcription factor activity (GO:0003700);; Cellular Component: nucleus (GO:0005634);; Biological Process: polyamine catabolic process (GO:0006598);; Biological Process: oligopeptide transport (GO:0006857);; Biological Process: response to water de…	--	Transcription factor MYB86 OS=Arabidopsis thaliana GN=MYB86 PE=2 SV=1	PREDICTED: uncharacterized LOC101209764 [Cucumis sativus]
CL95Contig1	p3	(GAT)5	15	301	316	AGTCATCGTCCTAACACATTG	55.17	21	ATGCAGACAGCTGAAACTTAG	54.96	21	148	[Z]	Cytoskeleton	Molecular Function: nucleotide binding (GO:0000166);; Biological Process: nuclear division (GO:0000280);; Biological Process: phragmoplast assembly (GO:0000914);; Molecular Function: DNA binding (GO:0003677);; Molecular Function: protein binding (GO:0005515);; Cellular Component: nucleolus (GO:0005730);; Cellular Component: centrosome (GO:0005813);; Cellular Component: spindle (GO:0005819);; Cell…	--	Kinesin-like protein KIN12B OS=Arabidopsis thaliana GN=KIN12B PE=1 SV=1	PREDICTED: uncharacterized protein LOC100264192 [Vitis vinifera]
CL154Contig2	p3	(AAG)5	15	301	316	ACTCACATCCGAACAAGAAA	55.72	20	GAAGTGGAAGCTGTTGAAGTT	56.18	21	150	--	--	Cellular Component: vacuole (GO:0005773);; Biological Process: protein targeting to membrane (GO:0006612);; Biological Process: positive regulation of flavonoid biosynthetic process (GO:0009963);; Biological Process: regulation of plant-type hypersensitive response (GO:0010363);;	--	--	Actin cross-linking protein, putative [Theobroma cacao]
CL171Contig1	p3	(TCT)5	15	52	67	GGAGGTTCCTTCAAGAATCTAA	56.62	22	CTGGATATGGATCAAGAAACTC	55.41	22	132	[R]	General function prediction only	Molecular Function: binding (GO:0005488);; Biological Process: transcription, DNA-dependent (GO:0006351);; Biological Process: cellular protein modification process (GO:0006464);; Biological Process: organelle organization (GO:0006996);; Biological Process: cell surface receptor signaling pathway (GO:0007166);; Biological Process: multicellular organismal development (GO:0007275);; Biological Pro…	--	PH-interacting protein OS=Homo sapiens GN=PHIP PE=1 SV=2	PREDICTED: uncharacterized protein LOC101214610 [Cucumis sativus]
CL421Contig1	p2	(GA)7	14	301	315	GTAAAAAGAGACGCCTTGAA	54.85	20	GTGAATTTACGCTTTTGACC	54.97	20	198	--	--	--	--	--	PREDICTED: uncharacterized protein LOC100242675 [Vitis vinifera]
CL456Contig1	p2	(TC)7	14	52	66	TACTCGCTGATTCCTTTCAA	56.14	20	CTCAAAGAAGTAAAACCAGAGC	55.21	22	176	[G]	Carbohydrate transport and metabolism	Biological Process: polysaccharide catabolic process (GO:0000272);; Biological Process: response to hypoxia (GO:0001666);; Molecular Function: starch synthase activity (GO:0009011);; Cellular Component: plant-type cell wall (GO:0009505);; Cellular Component: chloroplast (GO:0009507);; Biological Process: plant-type cell wall organization (GO:0009664);; Biological Process: starch biosynthetic proc…	--	Probable starch synthase 4, chloroplastic/amyloplastic OS=Arabidopsis thaliana GN=SS4 PE=2 SV=1	PREDICTED: uncharacterized protein LOC100257130 [Vitis vinifera]
CL559Contig1	p3	(TCT)6	18	301	319	ACAAGAAGATGAGAGGGATTG	55.88	21	CACCCTTTTCTTTCATTCCT	55.86	20	159	--	--	Cellular Component: nucleus (GO:0005634);;	--	Putative lipase YOR059C OS=Saccharomyces cerevisiae (strain ATCC 204508 / S288c) GN=YOR059C PE=1 SV=1	PREDICTED: uncharacterized protein LOC101220342 [Cucumis sativus]
CL665Contig1	p3	(CTC)5	15	301	316	TGATCTGTATCAGGATGAGGA	55.58	21	GATATGTCTGCAGATGATGGT	54.98	21	116	[O]	Posttranslational modification, protein turnover, chaperones	Cellular Component: Golgi membrane (GO:0000139);; Molecular Function: ubiquitin-protein ligase activity (GO:0004842);; Cellular Component: nucleolus (GO:0005730);; Biological Process: base-excision repair (GO:0006284);; Biological Process: protein monoubiquitination (GO:0006513);; Biological Process: cellular membrane fusion (GO:0006944);; Biological Process: Golgi organization (GO:0007030);; Bio…	K10592|0.0|vvi:100255704|hypothetical protein LOC100255704	E3 ubiquitin-protein ligase UPL1 OS=Arabidopsis thaliana GN=UPL1 PE=1 SV=3	PREDICTED: LOW QUALITY PROTEIN: E3 ubiquitin-protein ligase UPL2-like [Cucumis sativus]
CL802Contig1	p3	(AAG)5	15	301	316	GAATCCGAATACAGCGACTAT	56	21	ACTCTTGCTTTTGCCTAACA	55.37	20	174	--	--	Molecular Function: protein binding (GO:0005515);; Cellular Component: cytosol (GO:0005829);; Cellular Component: plasma membrane (GO:0005886);; Biological Process: plant-type cell wall modification (GO:0009827);; Biological Process: pollen tube growth (GO:0009860);; Biological Process: chloroplast avoidance movement (GO:0009903);; Biological Process: chloroplast accumulation movement (GO:0009904…	--	Protein WEAK CHLOROPLAST MOVEMENT UNDER BLUE LIGHT 1 OS=Arabidopsis thaliana GN=WEB1 PE=1 SV=1	PREDICTED: protein WEAK CHLOROPLAST MOVEMENT UNDER BLUE LIGHT 1-like [Cucumis sativus]
CL831Contig1	p3	(CTC)5	15	251	266	CCACCCTGGAATCTTTTATT	55.66	20	GAGAAGGAGGTGGAGATCA	55.03	19	131	[P]	Inorganic ion transport and metabolism	Biological Process: response to hypoxia (GO:0001666);; Cellular Component: extracellular region (GO:0005576);; Cellular Component: nucleus (GO:0005634);; Cellular Component: plasma membrane (GO:0005886);; Biological Process: protein targeting to membrane (GO:0006612);; Biological Process: nucleotide transport (GO:0006862);; Biological Process: ER to Golgi vesicle-mediated transport (GO:0006888);;…	--	Ammonium transporter 1 member 4 OS=Arabidopsis thaliana GN=AMT1-4 PE=1 SV=1	PREDICTED: LOW QUALITY PROTEIN: ammonium transporter 1 member 2-like [Cucumis sativus]
CL902Contig1	p3	(TTC)5	15	301	316	GAGCAACATTCACTGAAAGAG	55.17	21	GGTCATGTACATCTCAACAAG	52.96	21	152	[K]	Transcription	Biological Process: mitotic cell cycle (GO:0000278);; Cellular Component: DNA-directed RNA polymerase IV complex (GO:0000418);; Cellular Component: DNA-directed RNA polymerase V complex (GO:0000419);; Biological Process: double-strand break repair via homologous recombination (GO:0000724);; Molecular Function: protein binding (GO:0005515);; Cellular Component: nucleolus (GO:0005730);; Biological …	--	DNA-directed RNA polymerase E subunit 1 OS=Arabidopsis thaliana GN=NRPE1 PE=1 SV=1	PREDICTED: DNA-directed RNA polymerase E subunit 1-like [Cucumis sativus]
CL970Contig1	p2	(AG)7	14	301	315	CTTCGTTTAGATTCCTAGATGG	54.97	22	GAACTGAAGATTGTGAAACC	52.08	20	162	--	--	Biological Process: polysaccharide biosynthetic process (GO:0000271);; Biological Process: cell morphogenesis involved in differentiation (GO:0000904);; Molecular Function: protein binding (GO:0005515);; Biological Process: cellular protein modification process (GO:0006464);; Biological Process: organelle organization (GO:0006996);; Biological Process: pattern specification process (GO:0007389);;…	--	Leucine-rich repeat extensin-like protein 2 OS=Arabidopsis thaliana GN=LRX2 PE=1 SV=1	Leucine-rich repeat family protein / extensin family protein [Theobroma cacao]
CL984Contig1	p3	(ATT)5	15	301	316	CTTCAAAGGGGTACAAACTTC	55.55	21	ACAACCTCACAATTCAAGGA	55.55	20	195	[C]	Energy production and conversion	Molecular Function: dihydrolipoyllysine-residue succinyltransferase activity (GO:0004149);; Molecular Function: protein binding (GO:0005515);; Cellular Component: nucleus (GO:0005634);; Cellular Component: mitochondrion (GO:0005739);; Cellular Component: mitochondrial matrix (GO:0005759);; Cellular Component: Golgi apparatus (GO:0005794);; Biological Process: tricarboxylic acid cycle (GO:0006099)…	K00658|0.0|rcu:RCOM_1303600|dihydrolipoamide succinyltransferase component of 2-oxoglutarate dehydrogenase, putative (EC:2.3.1.61)	Dihydrolipoyllysine-residue succinyltransferase component of 2-oxoglutarate dehydrogenase complex 2, mitochondrial OS=Arabidopsis thaliana GN=At4g26910 PE=1 SV=2	PREDICTED: dihydrolipoyllysine-residue succinyltransferase component of 2-oxoglutarate dehydrogenase complex 2, mitochondrial-like [Cucumis sativus]
CL1002Contig1	p3	(ATC)5	15	206	221	CGTAAGCTTTCCTCTTGAAA	55.03	20	ATTGAGACGCATCAAGTGAA	56.81	20	151	[V]	Defense mechanisms	Molecular Function: ATP binding (GO:0005524);; Cellular Component: endosome (GO:0005768);; Cellular Component: Golgi apparatus (GO:0005794);; Cellular Component: plasma membrane (GO:0005886);; Biological Process: nucleobase-containing compound metabolic process (GO:0006139);; Biological Process: ATP catabolic process (GO:0006200);; Biological Process: cholesterol metabolic process (GO:0008203);; …	--	ABC transporter G family member 25 OS=Arabidopsis thaliana GN=ABCG25 PE=2 SV=1	PREDICTED: ABC transporter G family member 25-like [Cucumis sativus]
CL1025Contig1	p3	(GAA)5	15	205	220	ACCAGGGGTTTTAAGGAATA	55.27	20	GGAGATTACTGTGAGGTGAAA	54.34	21	156	[Q]	Secondary metabolites biosynthesis, transport and catabolism	Biological Process: retinoid metabolic process (GO:0001523);; Molecular Function: monooxygenase activity (GO:0004497);; Molecular Function: binding (GO:0005488);; Biological Process: alcohol metabolic process (GO:0006066);; Biological Process: response to stress (GO:0006950);; Biological Process: brain development (GO:0007420);; Biological Process: response to light stimulus (GO:0009416);; Cellul…	--	Cytochrome P450 716B2 OS=Picea sitchensis GN=CYP716B2 PE=2 SV=1	Cytochrome P450 [Theobroma cacao]
CL1026Contig1	p3	(TTA)5	15	301	316	CTTTCACCTCCTTCACTTGAT	55.96	21	TGGCTCAAATAGCTGGTTC	56.43	19	150	--	--	--	--	UPF0481 protein At3g47200 OS=Arabidopsis thaliana GN=At3g47200 PE=1 SV=1	hypothetical protein PRUPE_ppa018811mg [Prunus persica]
CL1053Contig1	p3	(TCT)5	15	42	57	TTTCGTGTATCCGGAAGAT	55.58	19	GGCTTTGATGGAGGTTTTAT	55.81	20	141	--	--	Cellular Component: mitochondrion (GO:0005739);; Biological Process: post-embryonic development (GO:0009791);; Biological Process: reproductive structure development (GO:0048608);;	--	Pentatricopeptide repeat-containing protein At2g36240 OS=Arabidopsis thaliana GN=At2g36240 PE=2 SV=1	PREDICTED: pentatricopeptide repeat-containing protein At2g36240-like [Cucumis sativus]
CL1087Contig1	p3	(TCT)5	15	301	316	GATACTGAATTGAGGCTTGGT	55.9	21	ACCTCTTTTAGACCCAGAAAC	54.25	21	156	--	--	Molecular Function: acid phosphatase activity (GO:0003993);; Molecular Function: protein binding (GO:0005515);; Cellular Component: intracellular (GO:0005622);; Cellular Component: nucleus (GO:0005634);; Cellular Component: mitochondrion (GO:0005739);; Cellular Component: endosome (GO:0005768);; Cellular Component: Golgi apparatus (GO:0005794);; Cellular Component: trans-Golgi network (GO:0005802…	--	Auxin-responsive protein IAA8 OS=Arabidopsis thaliana GN=IAA8 PE=1 SV=1	PREDICTED: auxin-responsive protein IAA8-like [Cucumis sativus]
CL1457Contig1	p3	(CTT)6	18	301	319	ACAGTCGTTAGGATTCATCG	55.24	20	AAGCAGTAGAAGGGTCAGAAG	55.46	21	151	--	--	Cellular Component: mitochondrion (GO:0005739);; Cellular Component: chloroplast inner membrane (GO:0009706);;	--	Splicing factor, arginine/serine-rich 19 OS=Mus musculus GN=Scaf1 PE=1 SV=1	PREDICTED: uncharacterized protein LOC101205574 [Cucumis sativus]
CL1467Contig1	p3	(GAA)5	15	301	316	GAGAAGAGCAACAAGAACAGA	54.87	21	ATGGATCTTCTTCCGATCTC	55.71	20	147	[M]	Cell wall/membrane/envelope biogenesis	Cellular Component: extracellular region (GO:0005576);; Cellular Component: vacuole (GO:0005773);; Biological Process: cell adhesion (GO:0007155);;	--	Fasciclin-like arabinogalactan protein 17 OS=Arabidopsis thaliana GN=FLA17 PE=2 SV=1	PREDICTED: fasciclin-like arabinogalactan protein 17-like [Cucumis sativus]
CL1505Contig1	p4	(AAGA)6	24	201	225	TTACCCCTCCTTCAAGAAAT	55.39	20	CAATCCCTCCAATCTTAGTCT	54.99	21	178	--	--	Molecular Function: ubiquitin-protein ligase activity (GO:0004842);; Molecular Function: protein binding (GO:0005515);; Cellular Component: nucleus (GO:0005634);; Cellular Component: cytosol (GO:0005829);; Biological Process: amino acid transport (GO:0006865);; Molecular Function: zinc ion binding (GO:0008270);; Biological Process: negative regulation of abscisic acid mediated signaling pathway (…	--	E3 ubiquitin-protein ligase AIP2 OS=Arabidopsis thaliana GN=AIP2 PE=1 SV=1	PREDICTED: E3 ubiquitin-protein ligase AIP2-like isoform 2 [Cucumis sativus]
CL1521Contig1	p3	(GTC)5	15	301	316	CGAAAAACTGAACCAACTTC	55.01	20	TTAAAGCAAATGGAGAGAGC	54.93	20	159	--	--	Cellular Component: cytosol (GO:0005829);; Biological Process: multicellular organismal development (GO:0007275);; Biological Process: sensory perception (GO:0007600);; Biological Process: pollen tube guidance (GO:0010183);; Biological Process: negative regulation of macromolecule metabolic process (GO:0010605);; Biological Process: Wnt receptor signaling pathway (GO:0016055);; Biological Process…	--	Probable nucleoredoxin 1 OS=Arabidopsis thaliana GN=At1g60420 PE=1 SV=1	hypothetical protein VITISV_008818 [Vitis vinifera]
CL1537Contig1	p3	(AGA)6	18	301	319	AGGCAAACAGAAGCTAAGAAG	55.76	21	CGAGTTCATTTTCACAGTTG	54.29	20	157	--	--	Cellular Component: mitochondrion (GO:0005739);; Cellular Component: endosome (GO:0005768);; Cellular Component: early endosome (GO:0005769);; Cellular Component: Golgi apparatus (GO:0005794);; Cellular Component: trans-Golgi network (GO:0005802);; Cellular Component: cytosol (GO:0005829);; Cellular Component: plasma membrane (GO:0005886);; Biological Process: receptor-mediated endocytosis (GO:00…	--	Secretory carrier-associated membrane protein 3 OS=Arabidopsis thaliana GN=SCAMP3 PE=1 SV=1	PREDICTED: secretory carrier-associated membrane protein 3-like [Cucumis sativus]
CL1596Contig1	p3	(TGG)5	15	159	174	GATCAGCTTTCACCTCCAC	55.61	19	GTAGATTCACATCTAGGGCATT	55.04	22	158	--	--	Molecular Function: sequence-specific DNA binding transcription factor activity (GO:0003700);; Cellular Component: nucleus (GO:0005634);; Biological Process: determination of bilateral symmetry (GO:0009855);; Biological Process: polarity specification of adaxial/abaxial axis (GO:0009944);; Biological Process: meristem initiation (GO:0010014);; Biological Process: guard cell differentiation (GO:00…	--	Dof zinc finger protein DOF3.6 OS=Arabidopsis thaliana GN=DOF3.6 PE=1 SV=2	PREDICTED: dof zinc finger protein DOF3.6-like [Cucumis sativus]
CL1723Contig1	p2	(AG)7	14	68	82	CCCCGTAGAAATAATAAGTGG	55.48	21	TTCTATTAAGAGTGCCCTAAGC	54.89	22	170	--	--	Molecular Function: nucleotide binding (GO:0000166);; Biological Process: cell morphogenesis (GO:0000902);; Biological Process: immune system process (GO:0002376);; Molecular Function: protein binding (GO:0005515);; Cellular Component: nuclear lamina (GO:0005652);; Cellular Component: cytosol (GO:0005829);; Cellular Component: plasma membrane (GO:0005886);; Cellular Component: cell cortex (GO:000…	--	Putative nuclear matrix constituent protein 1-like protein OS=Arabidopsis thaliana GN=At5g65770 PE=2 SV=1	nuclear matrix constituent-like protein 1 [Cucumis melo subsp. melo]
CL1761Contig1	p3	(GAA)5	15	301	316	CTTCACCGACAACTTTCTTT	54.58	20	AAAATCAATGGCGCTTGC	59.78	18	178	[EH]	--	Biological Process: sulfate assimilation (GO:0000103);; Molecular Function: phosphoadenylyl-sulfate reductase (thioredoxin) activity (GO:0004604);; Biological Process: cellular amino acid biosynthetic process (GO:0008652);; Cellular Component: chloroplast (GO:0009507);; Cellular Component: chloroplast stroma (GO:0009570);; Molecular Function: adenylyl-sulfate reductase activity (GO:0009973);; Bio…	--	5&apos;-adenylylsulfate reductase 3, chloroplastic OS=Arabidopsis thaliana GN=APR3 PE=2 SV=2	adenylyl-sulfate reductase [Cucumis melo subsp. melo]
CL1853Contig1	p3	(TGG)5	15	301	316	TAAGTCAAAGACGGAGTGAGA	55.18	21	ACTTTCGGCTTTCTAGCTTC	55.67	20	150	[O]	Posttranslational modification, protein turnover, chaperones	Molecular Function: protein serine/threonine kinase activity (GO:0004674);; Molecular Function: ATP binding (GO:0005524);; Cellular Component: nucleus (GO:0005634);; Cellular Component: cytoplasm (GO:0005737);; Biological Process: DNA-dependent DNA replication (GO:0006261);; Biological Process: protein folding (GO:0006457);; Biological Process: protein phosphorylation (GO:0006468);; Biological Pr…	K09529|1e-166|vvi:100265910|hypothetical protein LOC100265910	Chaperone protein dnaJ 6 OS=Arabidopsis thaliana GN=ATJ6 PE=1 SV=1	PREDICTED: chaperone protein dnaJ 6-like [Cucumis sativus]
CL1873Contig1	p3	(TGG)5	15	301	316	TCCGTGTTCAGTAGAGTTGTT	54.95	21	CAAAATCTCTCCAATCAAGC	55	20	257	--	--	Biological Process: response to stimulus (GO:0050896);;	--	--	Uncharacterized protein TCM_002034 [Theobroma cacao]
CL2204Contig1	p3	(CAG)5	15	301	316	TATCTCTTTGCTGCCTGTTT	55.29	20	TGAATAGTGTTGTTGCTGGA	55.2	20	139	[O]	Posttranslational modification, protein turnover, chaperones	Molecular Function: protein binding (GO:0005515);; Cellular Component: mitochondrial inner membrane presequence translocase complex (GO:0005744);; Biological Process: protein targeting to mitochondrion (GO:0006626);; Biological Process: lipid transport (GO:0006869);; Biological Process: intra-Golgi vesicle-mediated transport (GO:0006891);; Biological Process: lithium ion transport (GO:0010351);; …	--	Mitochondrial import inner membrane translocase subunit TIM23-2 OS=Arabidopsis thaliana GN=TIM23-2 PE=1 SV=1	PREDICTED: mitochondrial import inner membrane translocase subunit tim23-like [Cucumis sativus]
CL2261Contig1	p3	(GAA)5	15	301	316	GCTTCAACATTCTCGATCTC	54.97	20	GAAGTGATTCCGAACTTCTTG	56.53	21	149	--	--	Biological Process: response to heat (GO:0009408);; Cellular Component: chloroplast (GO:0009507);; Biological Process: determination of bilateral symmetry (GO:0009855);; Biological Process: organ morphogenesis (GO:0009887);; Biological Process: polarity specification of adaxial/abaxial axis (GO:0009944);; Biological Process: cellular process (GO:0009987);; Biological Process: meristem initiation …	--	Chaperone protein ClpB1 OS=Oryza sativa subsp. japonica GN=CLPB1 PE=2 SV=1	PREDICTED: uncharacterized protein LOC101225921 [Cucumis sativus]
CL2403Contig1	p2	(AG)6	12	301	313	TATCTCTTCTCAGTCCCTTCG	56.21	21	ATTTCTCTCCATCTCTCTTGC	55.25	21	147	--	--	Cellular Component: nucleus (GO:0005634);; Biological Process: xylem development (GO:0010089);; Biological Process: cell wall macromolecule metabolic process (GO:0044036);;	--	--	PREDICTED: uncharacterized LOC101207141 [Cucumis sativus]
CL2419Contig1	p3	(GGA)6	18	301	319	GAGGCGATTGTTGAGTTATAG	54.27	21	GTTCTCAGTTTGGACAAGGTT	55.87	21	153	--	--	Molecular Function: protein binding (GO:0005515);; Biological Process: regulation of transcription, DNA-dependent (GO:0006355);; Biological Process: RNA processing (GO:0006396);; Biological Process: transport (GO:0006810);; Biological Process: response to stress (GO:0006950);; Biological Process: organelle organization (GO:0006996);; Biological Process: cellular macromolecule biosynthetic process…	--	Zinc finger CCCH domain-containing protein 55 OS=Oryza sativa subsp. japonica GN=Os08g0135800 PE=2 SV=1	PREDICTED: uncharacterized protein LOC101224379 [Cucumis sativus]
CL2539Contig1	p4	(GAAG)5	20	122	142	CCAGAAACAAGGAGAAGAAGA	56.25	21	GTCTGCATAGCTACCCTTTTT	55.41	21	149	--	--	Molecular Function: protein binding (GO:0005515);; Cellular Component: nucleus (GO:0005634);; Cellular Component: microtubule (GO:0005874);; Cellular Component: plasma membrane (GO:0005886);; Biological Process: plant-type cell wall organization (GO:0009664);; Cellular Component: actin cytoskeleton (GO:0015629);; Biological Process: regulation of cell proliferation (GO:0042127);; Cellular Compone…	--	Interactor of constitutive active ROPs 3 OS=Arabidopsis thaliana GN=ICR3 PE=2 SV=1	PREDICTED: interactor of constitutive active ROPs 3-like [Cucumis sativus]
CL2609Contig1	p3	(ATC)6	18	301	319	CGTCTCATCTTATTGACCATC	54.72	21	GAAAGCAGAGGATTGAGAGAT	55.25	21	158	--	--	Biological Process: apoptotic process (GO:0006915);; Biological Process: regulation of cellular process (GO:0050794);;	--	Baculoviral IAP repeat-containing protein 7 OS=Mus musculus GN=Birc7 PE=2 SV=1	PREDICTED: uncharacterized protein LOC101229955 [Cucumis sativus]
CL2617Contig1	p2	(AG)8	16	301	317	AGAAAATGGAGTTAGGTCGTC	55.06	21	GGTCAGGTTACAGAGTGTGAA	55.2	21	155	--	--	Biological Process: polysaccharide biosynthetic process (GO:0000271);; Biological Process: RNA splicing, via endonucleolytic cleavage and ligation (GO:0000394);; Molecular Function: inositol hexakisphosphate binding (GO:0000822);; Biological Process: response to molecule of bacterial origin (GO:0002237);; Molecular Function: ubiquitin-protein ligase activity (GO:0004842);; Molecular Function: pro…	--	Transport inhibitor response 1-like protein OS=Arabidopsis thaliana GN=At5g49980 PE=1 SV=1	PREDICTED: transport inhibitor response 1-like protein-like [Cucumis sativus]
CL2624Contig1	p3	(TCA)5	15	301	316	CCAAATTCCCTGTCATTACTAC	55.37	22	TGAGAAACCTCTTCTTCTTCC	55.31	21	153	--	--	--	--	HVA22-like protein h OS=Arabidopsis thaliana GN=HVA22H PE=2 SV=2	conserved hypothetical protein [Ricinus communis]
CL2667Contig1	p2	(CT)10	20	42	62	GCATCAGAAATAGGGAGAGAT	55.06	21	GGAACTGGGAAAAAGATGA	55.07	19	169	[RTKL]	--	Molecular Function: nucleotide binding (GO:0000166);; Biological Process: activation of MAPKK activity (GO:0000186);; Molecular Function: protein serine/threonine kinase activity (GO:0004674);; Molecular Function: MAP kinase kinase kinase activity (GO:0004709);; Molecular Function: ATP binding (GO:0005524);; Cellular Component: endoplasmic reticulum membrane (GO:0005789);; Cellular Component: pla…	--	Serine/threonine-protein kinase HT1 OS=Arabidopsis thaliana GN=HT1 PE=1 SV=1	PREDICTED: serine/threonine-protein kinase HT1-like [Cucumis sativus]
CL2901Contig1	p3	(GTG)5	15	301	316	ATGGCATTCCTTGAGTAGAAC	55.9	21	CTGCTTCACTGAATGGTAAAC	55.05	21	141	--	--	Molecular Function: protein binding (GO:0005515);; Cellular Component: nucleus (GO:0005634);; Biological Process: mRNA processing (GO:0006397);; Biological Process: humoral immune response (GO:0006959);; Molecular Function: hydrolase activity (GO:0016787);; Molecular Function: organic cyclic compound binding (GO:0097159);;	--	YTH domain family protein 1 OS=Mus musculus GN=Ythdf1 PE=2 SV=1	PREDICTED: uncharacterized protein LOC101206274 [Cucumis sativus]
CL2950Contig1	p6	(CCCAAC)5	30	301	331	CAACAACCTCAGGCTTACAT	55.32	20	GAGGTTGTGGTAGAGGTTGA	55.1	20	148	--	--	Molecular Function: binding (GO:0005488);; Biological Process: cellular macromolecule biosynthetic process (GO:0034645);; Cellular Component: intracellular membrane-bounded organelle (GO:0043231);; Biological Process: primary metabolic process (GO:0044238);;	--	Chromatin modification-related protein eaf-1 OS=Neurospora crassa (strain ATCC 24698 / 74-OR23-1A / CBS 708.71 / DSM 1257 / FGSC 987) GN=eaf-1 PE=3 SV=1	PREDICTED: uncharacterized protein LOC101205914 [Cucumis sativus]
CL2971Contig1	p2	(TC)7	14	132	146	TCACTCTCACTCTCAGTTTCAG	54.78	22	CTTTTCTGTTGGGGTTTCTA	54.54	20	152	--	--	Molecular Function: nucleic acid binding (GO:0003676);; Molecular Function: protein binding (GO:0005515);; Cellular Component: nucleolus (GO:0005730);; Biological Process: RNA processing (GO:0006396);; Biological Process: transport (GO:0006810);; Biological Process: sex differentiation (GO:0007548);; Biological Process: anatomical structure morphogenesis (GO:0009653);; Biological Process: embryo …	--	Putative G3BP-like protein OS=Schizosaccharomyces pombe (strain 972 / ATCC 24843) GN=nxt3 PE=1 SV=1	PREDICTED: putative G3BP-like protein-like [Cucumis sativus]
CL2971Contig1	p3	(CAC)5	15	301	316	TGTTTCTGGTTCTGCTAAGTC	54.76	21	GTGACGTATATCGTTGTTATCG	54.93	22	163	--	--	Molecular Function: nucleic acid binding (GO:0003676);; Molecular Function: protein binding (GO:0005515);; Cellular Component: nucleolus (GO:0005730);; Biological Process: RNA processing (GO:0006396);; Biological Process: transport (GO:0006810);; Biological Process: sex differentiation (GO:0007548);; Biological Process: anatomical structure morphogenesis (GO:0009653);; Biological Process: embryo …	--	Putative G3BP-like protein OS=Schizosaccharomyces pombe (strain 972 / ATCC 24843) GN=nxt3 PE=1 SV=1	PREDICTED: putative G3BP-like protein-like [Cucumis sativus]
CL3126Contig1	p3	(TCT)6	18	301	319	CTCTTCCTTTCTTCCTCTTTC	54.17	21	AACGAGTTCAGAAAGCTCAGT	55.93	21	147	[M]	Cell wall/membrane/envelope biogenesis	Cellular Component: extracellular region (GO:0005576);; Cellular Component: vacuole (GO:0005773);; Biological Process: cell adhesion (GO:0007155);;	--	Fasciclin-like arabinogalactan protein 17 OS=Arabidopsis thaliana GN=FLA17 PE=2 SV=1	PREDICTED: fasciclin-like arabinogalactan protein 17-like [Cucumis sativus]
CL3127Contig1	p2	(AG)6	12	301	313	CGAATTACAAGCTACGAGAGA	55.07	21	CCCCTTTCTTTACTGACACTG	56.48	21	154	--	--	Cellular Component: mitochondrion (GO:0005739);; Cellular Component: endosome (GO:0005768);; Cellular Component: Golgi apparatus (GO:0005794);; Cellular Component: trans-Golgi network (GO:0005802);; Biological Process: pollen development (GO:0009555);; Biological Process: pollen tube growth (GO:0009860);; Biological Process: regulation of meristem growth (GO:0010075);; Biological Process: homogal…	K13648|0.0|rcu:RCOM_0820390|Glycosyltransferase QUASIMODO1, putative	Probable galacturonosyltransferase 4 OS=Arabidopsis thaliana GN=GAUT4 PE=2 SV=1	PREDICTED: probable galacturonosyltransferase 4-like [Cucumis sativus]
CL3259Contig1	p2	(TC)7	14	39	53	CGCTTGACCGTATTCATTAT	55.38	20	CTTTCACAACTGACAAATCG	54.29	20	154	--	--	Biological Process: polysaccharide metabolic process (GO:0005976);; Biological Process: macromolecule biosynthetic process (GO:0009059);; Biological Process: unidimensional cell growth (GO:0009826);; Biological Process: epidermal cell differentiation (GO:0009913);; Biological Process: cellular macromolecule metabolic process (GO:0044260);; Biological Process: cell development (GO:0048468);; Biolo…	--	Transcription factor bHLH145 OS=Arabidopsis thaliana GN=BHLH145 PE=2 SV=1	PREDICTED: transcription factor bHLH145-like [Cucumis sativus]
CL3276Contig1	p3	(AGC)7	21	301	322	GATACATCGGCAACAACAG	54.95	19	GTCTTCTTCATCCTCATCCTC	55.34	21	160	--	--	Biological Process: regionalization (GO:0003002);; Molecular Function: binding (GO:0005488);; Cellular Component: nucleus (GO:0005634);; Biological Process: transcription, DNA-dependent (GO:0006351);; Biological Process: regulation of transcription, DNA-dependent (GO:0006355);; Biological Process: regulation of flower development (GO:0009909);; Biological Process: response to chitin (GO:0010200);…	--	Trihelix transcription factor PTL OS=Arabidopsis thaliana GN=PTL PE=2 SV=1	Duplicated homeodomain-like superfamily protein, putative [Theobroma cacao]
CL3300Contig1	p3	(CGG)6	18	301	319	GGAAGAAGAGAAGATTTGGAG	54.83	21	CGAAACCAAGGATTGATTC	55.54	19	158	--	--	Cellular Component: cell part (GO:0044464);;	--	Ankyrin repeat-containing protein At3g12360 OS=Arabidopsis thaliana GN=At3g12360 PE=2 SV=1	PREDICTED: ankyrin repeat-containing protein At5g02620-like [Cucumis sativus]
CL3302Contig1	p2	(TC)6	12	260	272	CTTCACTGAACGCAAGAACT	55.7	20	GATATCGTCGTAGGTTTCAGA	54.49	21	154	--	--	Molecular Function: nucleotide binding (GO:0000166);; Biological Process: mRNA splicing, via spliceosome (GO:0000398);; Molecular Function: nucleic acid binding (GO:0003676);; Molecular Function: RNA-directed RNA polymerase activity (GO:0003968);; Cellular Component: nucleolus (GO:0005730);; Biological Process: DNA methylation (GO:0006306);; Biological Process: methylation-dependent chromatin sil…	--	RNA-dependent RNA polymerase 2 OS=Arabidopsis thaliana GN=RDR2 PE=3 SV=1	RNA-dependent RNA polymerase 2-like [Cucumis sativus]
CL3305Contig1	p3	(CAT)5	15	301	316	GCTTCCAATGACATTTTCTC	54.82	20	GTTGGATAATGGATGGAGACT	55.51	21	150	--	--	Molecular Function: binding (GO:0005488);; Cellular Component: intracellular organelle (GO:0043229);; Biological Process: cellular metabolic process (GO:0044237);; Biological Process: primary metabolic process (GO:0044238);; Biological Process: organic substance metabolic process (GO:0071704);;	--	Glutamic acid-rich protein OS=Plasmodium falciparum (isolate FC27 / Papua New Guinea) GN=GARP PE=4 SV=1	PREDICTED: uncharacterized protein LOC101301900 [Fragaria vesca subsp. vesca]
CL3363Contig1	p3	(CCG)5	15	301	316	CAGCGAGTAATGAGGTTGTTA	55.67	21	AGCATAAGCCTGGATGTAAA	55.09	20	173
CL3646Contig1	p3	(GCT)5	15	301	316	ACCTTGAACATAGGATTGACC	55.58	21	AATGCAACAACAACAGCAG	55.75	19	166	--	--	Molecular Function: DNA binding (GO:0003677);; Molecular Function: transcription coactivator activity (GO:0003713);; Molecular Function: protein binding (GO:0005515);; Biological Process: cell death (GO:0008219);; Biological Process: red, far-red light phototransduction (GO:0009585);; Biological Process: jasmonic acid mediated signaling pathway (GO:0009867);; Biological Process: positive regulati…	--	Mediator of RNA polymerase II transcription subunit 25 OS=Arabidopsis thaliana GN=MED25 PE=1 SV=1	PREDICTED: mediator of RNA polymerase II transcription subunit 25-like [Cucumis sativus]
CL3646Contig1	p3	(TGT)5	15	489	504	GTTGTTGCAGCTGAGAAAGT	55.69	20	TTCCAGGGGATATGGTAGTAT	55.09	21	144	--	--	Molecular Function: DNA binding (GO:0003677);; Molecular Function: transcription coactivator activity (GO:0003713);; Molecular Function: protein binding (GO:0005515);; Biological Process: cell death (GO:0008219);; Biological Process: red, far-red light phototransduction (GO:0009585);; Biological Process: jasmonic acid mediated signaling pathway (GO:0009867);; Biological Process: positive regulati…	--	Mediator of RNA polymerase II transcription subunit 25 OS=Arabidopsis thaliana GN=MED25 PE=1 SV=1	PREDICTED: mediator of RNA polymerase II transcription subunit 25-like [Cucumis sativus]
CL3845Contig1	p3	(CCG)5	15	301	316	ATTCATCAACCCCATCACTA	55.25	20	TTAGGGTTAAGGAAGATACGG	55.22	21	141	--	--	Molecular Function: protein binding (GO:0005515);; Biological Process: negative regulation of gene expression (GO:0010629);; Biological Process: histone acetylation (GO:0016573);; Molecular Function: transferase activity, transferring acyl groups other than amino-acyl groups (GO:0016747);; Molecular Function: histone-lysine N-methyltransferase activity (GO:0018024);; Cellular Component: histone m…	--	Histone-lysine N-methyltransferase 2B OS=Mus musculus GN=Kmt2b PE=1 SV=3	PREDICTED: uncharacterized protein LOC101208296 [Cucumis sativus]
CL3886Contig1	p2	(TC)7	14	33	47	TCCGACATCGTTTTTAACTG	56.34	20	AGCTTGCAATGGTGAATAAG	55.58	20	138	[K]	Transcription	Molecular Function: transcription regulatory region sequence-specific DNA binding (GO:0000976);; Molecular Function: sequence-specific DNA binding transcription factor activity (GO:0003700);; Cellular Component: nucleus (GO:0005634);; Biological Process: regulation of transcription, DNA-dependent (GO:0006355);; Biological Process: response to water deprivation (GO:0009414);; Biological Process: r…	--	Homeobox-leucine zipper protein ATHB-13 OS=Arabidopsis thaliana GN=ATHB-13 PE=2 SV=2	PREDICTED: homeobox-leucine zipper protein ATHB-13-like [Cucumis sativus]
CL3886Contig1	p2	(TA)7	14	163	177	TTGCAAGCTAGCCTTCTAAT	54.74	20	CCAATATGTTCTGTGGTATGG	55.4	21	147	[K]	Transcription	Molecular Function: transcription regulatory region sequence-specific DNA binding (GO:0000976);; Molecular Function: sequence-specific DNA binding transcription factor activity (GO:0003700);; Cellular Component: nucleus (GO:0005634);; Biological Process: regulation of transcription, DNA-dependent (GO:0006355);; Biological Process: response to water deprivation (GO:0009414);; Biological Process: r…	--	Homeobox-leucine zipper protein ATHB-13 OS=Arabidopsis thaliana GN=ATHB-13 PE=2 SV=2	PREDICTED: homeobox-leucine zipper protein ATHB-13-like [Cucumis sativus]
CL4117Contig1	p3	(CAT)5	15	301	316	CTCCATTCCTCCTACCATAAA	55.84	21	CAGAGTTTGTTTCCAAGTCAG	55.1	21	166	[G]	Carbohydrate transport and metabolism	Molecular Function: adenosine kinase activity (GO:0004001);; Molecular Function: ribokinase activity (GO:0004747);; Cellular Component: mitochondrion (GO:0005739);; Biological Process: D-ribose metabolic process (GO:0006014);; Biological Process: AMP biosynthetic process (GO:0006167);; Biological Process: phosphate-containing compound metabolic process (GO:0006796);; Cellular Component: chloropla…	--	Uncharacterized sugar kinase slr0537 OS=Synechocystis sp. (strain PCC 6803 / Kazusa) GN=slr0537 PE=3 SV=1	PREDICTED: uncharacterized sugar kinase slr0537-like [Cucumis sativus]
CL4172Contig1	p3	(CTT)5	15	301	316	CCAAAGTAGGATCAGGGTAAT	54.89	21	TAGTTGAGCTTCTATGGCAGA	55.47	21	156	--	--	Molecular Function: DNA binding (GO:0003677);; Molecular Function: sequence-specific DNA binding transcription factor activity (GO:0003700);; Molecular Function: protein binding (GO:0005515);; Cellular Component: nucleus (GO:0005634);; Biological Process: regulation of transcription, DNA-dependent (GO:0006355);; Biological Process: cellular amino acid metabolic process (GO:0006520);; Biological P…	--	Transcription factor PIF1 OS=Arabidopsis thaliana GN=PIF1 PE=1 SV=1	PREDICTED: transcription factor PIF1-like [Cucumis sativus]
CL5774Contig1	p3	(AAC)5	15	205	220	ACCTTTTCCATCTTTCTTGG	55.86	20	CAGCATAAGTTCTCAAGCTACA	55.16	22	147	--	--	Cellular Component: mitochondrion (GO:0005739);; Cellular Component: cytosol (GO:0005829);; Biological Process: water transport (GO:0006833);; Biological Process: response to heat (GO:0009408);; Biological Process: response to cold (GO:0009409);; Biological Process: response to salt stress (GO:0009651);; Biological Process: response to fructose stimulus (GO:0009750);; Biological Process: vegetati…	--	BAG family molecular chaperone regulator 1 OS=Arabidopsis thaliana GN=BAG1 PE=1 SV=1	PREDICTED: BAG family molecular chaperone regulator 1-like [Cucumis sativus]
CL7344Contig1	p3	(AAG)6	18	301	319	GGTGGAGCATATGGTTTTTA	55.18	20	AAAGAGGATGATTCCTGGAT	55.12	20	160	--	--	Cellular Component: chloroplast (GO:0009507);;	--	--	PREDICTED: uncharacterized protein LOC101216390 [Cucumis sativus]
CL8441Contig1	p2	(GA)6	12	301	313	GATCGAGAAAGGGATAGAGAC	54.61	21	TCTTGAGTAACTCCTCCTCCT	54.77	21	159	--	--	Biological Process: regulation of alternative nuclear mRNA splicing, via spliceosome (GO:0000381);; Molecular Function: mRNA binding (GO:0003729);; Molecular Function: protein binding (GO:0005515);; Cellular Component: nucleolus (GO:0005730);; Cellular Component: cytoplasm (GO:0005737);; Cellular Component: nuclear speck (GO:0016607);; Biological Process: execution phase of apoptosis (GO:0097194)…	K12849|0.0|vvi:100266508|hypothetical protein LOC100266508	Pre-mRNA-splicing factor 38A OS=Xenopus laevis GN=prpf38a PE=2 SV=1	PREDICTED: uncharacterized protein LOC100266508 [Vitis vinifera]
CL8454Contig1	p2	(TC)7	14	114	128	TACACTAGTACTCCGCCACTG	55.63	21	GAAATGAAGAGAATCGTTGG	54.84	20	146	[CR]	--	Molecular Function: nucleotide binding (GO:0000166);; Molecular Function: mRNA 3'-UTR binding (GO:0003730);; Molecular Function: NADPH:quinone reductase activity (GO:0003960);; Cellular Component: mitochondrion (GO:0005739);; Biological Process: metabolic process (GO:0008152);; Molecular Function: zinc ion binding (GO:0008270);; Cellular Component: plastid envelope (GO:0009526);; Cellular Compone…	--	Reticulon-4-interacting protein 1, mitochondrial OS=Mus musculus GN=Rtn4ip1 PE=1 SV=2	PREDICTED: reticulon-4-interacting protein 1, mitochondrial-like [Cucumis sativus]
CL8501Contig1	p3	(TGT)5	15	301	316	AGCCGTAGTTGTTTAGGAGTT	54.95	21	TTCGACTACGTAATCTTCTCG	54.91	21	139	--	--	--	--	--	hypothetical protein [Cucumis melo subsp. melo]
CL8551Contig1	p3	(TCC)5	15	184	199	ACCACTCTCTTTTCTTCTTCAC	54.43	22	GTTTGGAGGAAGGAGATCTAA	55.12	21	159	--	--	Cellular Component: cytosol (GO:0005829);; Cellular Component: plasma membrane (GO:0005886);; Biological Process: acetyl-CoA metabolic process (GO:0006084);; Biological Process: microtubule nucleation (GO:0007020);; Biological Process: regulation of meristem growth (GO:0010075);;	--	Protein IQ-DOMAIN 1 OS=Arabidopsis thaliana GN=IQD1 PE=1 SV=1	PREDICTED: protein IQ-DOMAIN 14 [Vitis vinifera]
CL8577Contig1	p3	(TTC)6	18	301	319	GAGTAACATAATGCTTCCTTCC	54.79	22	GCATGATGTAAAAAGGACAG	53.29	20	151	--	--	--	--	--	PREDICTED: uncharacterized protein LOC101207898 [Cucumis sativus]
CL8577Contig1	p3	(TCC)5	15	317	332	GCTTTCTGGTTCTTCTTCTTC	55.06	21	TCACAGGGGTCTAACAAAAC	55.12	20	194	--	--	--	--	--	PREDICTED: uncharacterized protein LOC101207898 [Cucumis sativus]
CL8583Contig1	p2	(TG)8	16	301	317	ATTTCAGGCCTAATTCTTCG	56.12	20	AAACCGTTTCTGCATTCAC	56.17	19	141	[V]	Defense mechanisms	Cellular Component: plasma membrane (GO:0005886);; Biological Process: drug transmembrane transport (GO:0006855);; Cellular Component: plant-type vacuole membrane (GO:0009705);; Biological Process: proanthocyanidin biosynthetic process (GO:0010023);; Biological Process: maintenance of seed dormancy (GO:0010231);; Molecular Function: drug transmembrane transporter activity (GO:0015238);; Molecular…	--	MATE efflux family protein 8 OS=Arabidopsis thaliana GN=DTXL4 PE=3 SV=2	PREDICTED: MATE efflux family protein 9-like [Vitis vinifera]
CL8633Contig1	p3	(GCT)6	18	207	225	GGCAGAAAAGAATCAGATAGAG	55.06	22	GAGCAACAGAATGACTAGCAC	55.19	21	156	[DZ]	--	Biological Process: mitotic cell cycle (GO:0000278);; Cellular Component: chromatin (GO:0000785);; Molecular Function: chromatin binding (GO:0003682);; Molecular Function: guanyl-nucleotide exchange factor activity (GO:0005085);; Cellular Component: nucleus (GO:0005634);; Cellular Component: microtubule organizing center (GO:0005815);; Cellular Component: cytosol (GO:0005829);; Biological Process…	--	Ultraviolet-B receptor UVR8 OS=Arabidopsis thaliana GN=UVR8 PE=1 SV=1	PREDICTED: probable E3 ubiquitin-protein ligase HERC1-like [Cucumis sativus]
CL8669Contig1	p3	(CTA)8	24	301	325	TAATAGTCACAAGCCAACAGG	55.52	21	TACCAACCTTCATTTTGTCC	55.05	20	148	--	--	Biological Process: cell fate determination (GO:0001709);; Molecular Function: RNA binding (GO:0003723);; Cellular Component: nucleus (GO:0005634);; Biological Process: regulation of transcription, DNA-dependent (GO:0006355);; Molecular Function: metal ion binding (GO:0046872);;	--	Zinc finger CCCH domain-containing protein 37 OS=Arabidopsis thaliana GN=HUA1 PE=1 SV=1	PREDICTED: zinc finger CCCH domain-containing protein 37-like [Cucumis sativus]
CL8689Contig1	p3	(TTC)5	15	301	316	GAGATGGGTTTGAAGAAGAAG	55.59	21	GGATGAACAGAATCAGAAACC	56.13	21	149	--	--	Molecular Function: DNA binding (GO:0003677);; Molecular Function: sequence-specific DNA binding transcription factor activity (GO:0003700);; Molecular Function: protein binding (GO:0005515);; Biological Process: regulation of transcription, DNA-dependent (GO:0006355);; Biological Process: cell communication (GO:0007154);; Biological Process: cellular response to stress (GO:0033554);; Biological …	--	Transcription factor RF2b OS=Oryza sativa subsp. japonica GN=RF2b PE=1 SV=1	b-zip DNA binding protein [Cucumis melo subsp. melo]
CL8765Contig1	p3	(TCT)5	15	84	99	ACTTTCCCTTCCATTTTCTC	54.93	20	GGAGTTTAGCGTAATCAAGGA	56.2	21	149	--	--	Cellular Component: cytosol (GO:0005829);; Biological Process: myo-inositol hexakisphosphate biosynthetic process (GO:0010264);; Molecular Function: hydrolase activity (GO:0016787);; Molecular Function: ion binding (GO:0043167);; Molecular Function: metal ion binding (GO:0046872);; Molecular Function: inositol-1,3,4-trisphosphate 6-kinase activity (GO:0052725);; Molecular Function: inositol-1,3,4…	K00913|1e-116|vvi:100256264|hypothetical protein LOC100256264	Inositol-tetrakisphosphate 1-kinase 1 OS=Arabidopsis thaliana GN=ITPK1 PE=2 SV=1	PREDICTED: inositol-tetrakisphosphate 1-kinase 1-like [Cucumis sativus]
CL8842Contig1	p3	(CCT)5	15	140	155	GGAAAAACATGTCTCGAATC	54.65	20	GATTCCGATGAGGATCAATAC	56	21	144	--	--	Cellular Component: mitochondrion (GO:0005739);; Cellular Component: cytosol (GO:0005829);; Biological Process: carbohydrate metabolic process (GO:0005975);; Biological Process: post-embryonic development (GO:0009791);; Biological Process: cellular component organization (GO:0016043);; Biological Process: mRNA modification (GO:0016556);; Biological Process: isopentenyl diphosphate biosynthetic pr…	--	Pentatricopeptide repeat-containing protein At5g10690 OS=Arabidopsis thaliana GN=CBSPPR1 PE=2 SV=1	PREDICTED: pentatricopeptide repeat-containing protein At5g10690-like [Cucumis sativus]
CL8936Contig1	p3	(TTC)5	15	162	177	GCCATTTACAAACTATCCAAGG	57.71	22	TTTCTCTACTGCTGGTAAAGC	54.24	21	187	[D]	Cell cycle control, cell division, chromosome partitioning	Biological Process: microtubule cytoskeleton organization (GO:0000226);; Biological Process: mitotic cell cycle (GO:0000278);; Biological Process: cell morphogenesis (GO:0000902);; Molecular Function: protein binding (GO:0005515);; Cellular Component: extracellular region (GO:0005576);; Cellular Component: plasma membrane (GO:0005886);; Biological Process: RNA processing (GO:0006396);; Biological…	--	WEB family protein At2g38370 OS=Arabidopsis thaliana GN=At2g38370 PE=2 SV=1	PREDICTED: WEB family protein At2g38370-like [Cucumis sativus]
CL8961Contig1	p2	(TA)8	16	138	154	CCTTCAGCTAGTGATTAAAGAG	53.03	22	CAATCACTGTCCATGAATGA	55.2	20	160	[O]	Posttranslational modification, protein turnover, chaperones	Biological Process: maltose metabolic process (GO:0000023);; Biological Process: phosphatidylglycerol biosynthetic process (GO:0006655);; Cellular Component: chloroplast thylakoid membrane (GO:0009535);; Biological Process: leaf morphogenesis (GO:0009965);; Biological Process: thylakoid membrane organization (GO:0010027);; Cellular Component: integral to membrane (GO:0016021);; Biological Process…	K07399|0.0|vvi:100265915|hypothetical protein LOC100265915	Cytochrome c biogenesis protein CCS1, chloroplastic OS=Arabidopsis thaliana GN=CCS1 PE=2 SV=1	PREDICTED: cytochrome c biogenesis protein CCS1, chloroplastic-like [Cucumis sativus]
CL8975Contig1	p3	(TTG)6	18	301	319	AGCCATTAGATCATTGCTACC	56	21	GAATGGAAAAGGAGGAAAAG	55.51	20	157	--	--	Biological Process: reproduction (GO:0000003);; Biological Process: multicellular organismal process (GO:0032501);; Biological Process: multi-organism process (GO:0051704);; Biological Process: biological regulation (GO:0065007);;	--	Collagen-like protein 2 OS=Acanthamoeba polyphaga mimivirus GN=MIMI_R196 PE=4 SV=1	PREDICTED: uncharacterized protein LOC101209838 [Cucumis sativus]
CL9024Contig1	p3	(TGA)5	15	301	316	GAAGAGGCAGAAATTACTTGG	55.78	21	CCCCTTCATCTTTATCATACC	55.21	21	155	--	--	Biological Process: spliceosomal complex assembly (GO:0000245);; Molecular Function: ubiquitin thiolesterase activity (GO:0004221);; Molecular Function: protein binding (GO:0005515);; Cellular Component: nucleus (GO:0005634);; Biological Process: ubiquitin-dependent protein catabolic process (GO:0006511);; Biological Process: cell cycle (GO:0007049);; Molecular Function: peptidase activity (GO:00…	K12847|0.0|vvi:100251887|hypothetical protein LOC100251887	U4/U6.U5 tri-snRNP-associated protein 2 OS=Mus musculus GN=Usp39 PE=2 SV=2	PREDICTED: U4/U6.U5 tri-snRNP-associated protein 2-like [Cucumis sativus]
CL9094Contig1	p3	(GAA)5	15	301	316	AGATCTAGTGGCAATCACCTT	55.49	21	AGCTTCCTTTCCATCTGTATC	55.14	21	130	--	--	Cellular Component: cytoplasm (GO:0005737);;	--	F-box/kelch-repeat protein At1g22040 OS=Arabidopsis thaliana GN=At1g22040 PE=2 SV=1	PREDICTED: F-box/kelch-repeat protein At1g22040-like [Cucumis sativus]
CL9249Contig1	p3	(CAG)5	15	301	316	GATAAGCTCGTAAACAAAGGAC	55.02	22	TGCTCTCTCCTTGAGTAACTG	54.92	21	156	--	--	Biological Process: response to reactive oxygen species (GO:0000302);; Cellular Component: chromatin (GO:0000785);; Molecular Function: protein binding (GO:0005515);; Cellular Component: nucleus (GO:0005634);; Cellular Component: mitochondrion (GO:0005739);; Cellular Component: plasma membrane (GO:0005886);; Biological Process: DNA metabolic process (GO:0006259);; Biological Process: regulation o…	--	Copper transport protein ATX1 OS=Arabidopsis thaliana GN=ATX1 PE=1 SV=1	PREDICTED: uncharacterized protein LOC101214913 [Cucumis sativus]
CL9285Contig1	p3	(CTT)6	18	301	319	AAGAAAGCCCTATTCTTCCT	54.02	20	CTCAACAGAATGTGAAAGGAG	55.01	21	134	[R]	General function prediction only	Biological Process: microtubule cytoskeleton organization (GO:0000226);; Biological Process: RNA splicing, via endonucleolytic cleavage and ligation (GO:0000394);; Molecular Function: GTPase activity (GO:0003924);; Molecular Function: sphingomyelin phosphodiesterase activity (GO:0004767);; Molecular Function: GTP binding (GO:0005525);; Cellular Component: extracellular region (GO:0005576);; Cellu…	K04392|1e-134|vvi:100266143|hypothetical protein LOC100266143	Rac-like GTP-binding protein 5 OS=Oryza sativa subsp. japonica GN=RAC5 PE=2 SV=2	PREDICTED: rac-like GTP-binding protein RAC1-like [Cucumis sativus]
CL9358Contig1	p2	(TC)6	12	43	55	TCTCTCTCTTCTTCCTTTTGC	55.63	21	TTGATGTAGTCTTTCCCAGA	53.19	20	181	--	--	Molecular Function: transporter activity (GO:0005215);; Cellular Component: mitochondrial inner membrane (GO:0005743);; Biological Process: nitrogen compound metabolic process (GO:0006807);; Biological Process: mitochondrial transport (GO:0006839);; Cellular Component: chloroplast (GO:0009507);; Biological Process: embryo development ending in birth or egg hatching (GO:0009792);; Biological Proce…	K03454|0.0|vvi:100257503|similar to mitochondrial carrier protein	Mitochondrial carnitine/acylcarnitine carrier-like protein OS=Arabidopsis thaliana GN=BOU PE=1 SV=1	PREDICTED: mitochondrial carnitine/acylcarnitine carrier-like protein-like isoform 1 [Cucumis sativus]
CL9437Contig1	p4	(AGAA)5	20	64	84	TAGCTTTCCTTTCCTTTCCT	55.03	20	GGTTGGAAGACATTGATGAAG	57.1	21	155	--	--	Biological Process: gibberellic acid mediated signaling pathway (GO:0009740);; Biological Process: seed dormancy process (GO:0010162);; Cellular Component: anchored to membrane (GO:0031225);; Cellular Component: anchored to plasma membrane (GO:0046658);;	--	Uncharacterized GPI-anchored protein At4g28100 OS=Arabidopsis thaliana GN=At4g28100 PE=1 SV=1	PREDICTED: uncharacterized GPI-anchored protein At4g28100-like [Cucumis sativus]
CL9502Contig1	p3	(AAT)5	15	66	81	CTGGTTGTTGGTTCAACATT	55.93	20	GCCATGATTGTAATTTCCTC	54.63	20	158	[RTKL]	--	Biological Process: activation of MAPKK activity (GO:0000186);; Biological Process: polysaccharide biosynthetic process (GO:0000271);; Biological Process: polysaccharide catabolic process (GO:0000272);; Molecular Function: protein serine/threonine kinase activity (GO:0004674);; Molecular Function: MAP kinase kinase kinase activity (GO:0004709);; Molecular Function: protein binding (GO:0005515);; …	--	Probable receptor-like protein kinase At2g42960 OS=Arabidopsis thaliana GN=At2g42960 PE=3 SV=1	predicted protein [Populus trichocarpa]
CL9556Contig1	p3	(ATA)8	24	301	325	CTGAAAGTCTTGGACATTACG	55.07	21	CCGACCATCATCATTAATTC	55.35	20	156	--	--	Cellular Component: Golgi apparatus (GO:0005794);; Biological Process: lignin metabolic process (GO:0009808);; Biological Process: secondary cell wall biogenesis (GO:0009834);; Biological Process: glucuronoxylan metabolic process (GO:0010413);; Molecular Function: glucuronoxylan 4-O-methyltransferase activity (GO:0030775);; Biological Process: xylan biosynthetic process (GO:0045492);;	--	Protein IRX15-LIKE OS=Arabidopsis thaliana GN=IRX15-L PE=2 SV=1	PREDICTED: uncharacterized protein LOC101217122 [Cucumis sativus]
CL9596Contig1	p3	(AGC)5	15	301	316	ATGACACAGTCATCGTCTACC	54.96	21	ATGGATAATGAGCCTGACTG	55.15	20	148	--	--	Molecular Function: protein binding (GO:0005515);; Molecular Function: ATP binding (GO:0005524);; Cellular Component: nucleus (GO:0005634);; Cellular Component: nuclear envelope (GO:0005635);; Cellular Component: vacuole (GO:0005773);; Cellular Component: Golgi apparatus (GO:0005794);; Cellular Component: plasma membrane (GO:0005886);; Biological Process: regulation of transcription, DNA-dependen…	--	Growth-regulating factor 3 OS=Oryza sativa subsp. japonica GN=GRF3 PE=3 SV=2	PREDICTED: growth-regulating factor 3-like [Cucumis sativus]
CL9780Contig1	p2	(AG)6	12	45	57	TGTCTCTGTGATTTCTTGAGAG	54.72	22	GGAAGTGATTTTACGAGCAA	55.54	20	156	--	--	Cellular Component: nucleus (GO:0005634);; Cellular Component: plasma membrane (GO:0005886);; Biological Process: response to stress (GO:0006950);; Biological Process: response to abiotic stimulus (GO:0009628);; Biological Process: cellular metabolic process (GO:0044237);; Biological Process: regulation of biological process (GO:0050789);;	--	Uncharacterized protein At4g15545 OS=Arabidopsis thaliana GN=At4g15545 PE=1 SV=1	PREDICTED: uncharacterized protein LOC101220153 [Cucumis sativus]
CL9793Contig1	p3	(ATG)6	18	301	319	CGAAAGAGAGAATTCCAAGAG	55.92	21	TCGTTAACTTTACCTGAGAGG	53.93	21	160	--	--	--	--	--	PREDICTED: uncharacterized protein LOC101204955 [Cucumis sativus]
CL9883Contig1	p3	(AGA)5	15	301	316	CCTTAACAGCTGAAGGAAGAT	55.38	21	AGCATTTCTCTTTCTCTCTCC	54.57	21	117	--	--	Cellular Component: endoplasmic reticulum (GO:0005783);; Cellular Component: plasma membrane (GO:0005886);; Biological Process: carbohydrate metabolic process (GO:0005975);; Biological Process: chromatin silencing (GO:0006342);; Biological Process: cell communication (GO:0007154);; Biological Process: pattern specification process (GO:0007389);; Biological Process: asymmetric cell division (GO:00…	--	Glucan endo-1,3-beta-glucosidase 12 OS=Arabidopsis thaliana GN=At4g29360 PE=1 SV=1	PREDICTED: glucan endo-1,3-beta-glucosidase 13-like isoform 2 [Cucumis sativus]
CL10007Contig1	p2	(AG)9	18	301	319	GGGGAGAAAGTTACAAGAAGA	55.2	21	CAGACCAAGTTCCTGTTTCTA	54.61	21	159	[R]	General function prediction only	Cellular Component: extracellular region (GO:0005576);; Cellular Component: Golgi apparatus (GO:0005794);; Biological Process: protein targeting to vacuole (GO:0006623);; Biological Process: cellular membrane fusion (GO:0006944);; Molecular Function: zinc ion binding (GO:0008270);; Cellular Component: integral to membrane (GO:0016021);; Biological Process: vesicle-mediated transport (GO:0016192);…	--	Probable protein S-acyltransferase 14 OS=Arabidopsis thaliana GN=PAT14 PE=2 SV=1	PREDICTED: probable S-acyltransferase At3g60800-like [Cucumis sativus]
CL10168Contig1	p2	(GA)7	14	301	315	GAAGAAGAAAGAGACGGTGAT	55.17	21	CCCATTTCATCTTGTATTCTCC	57.55	22	122	[T]	Signal transduction mechanisms	Molecular Function: phosphatidylinositol-4,5-bisphosphate 5-phosphatase activity (GO:0004439);; Cellular Component: mitochondrion (GO:0005739);; Cellular Component: endoplasmic reticulum (GO:0005783);; Cellular Component: endoplasmic reticulum membrane (GO:0005789);; Cellular Component: Golgi apparatus (GO:0005794);; Cellular Component: plasmodesma (GO:0009506);; Biological Process: response to w…	--	Phosphoinositide phosphatase SAC7 OS=Arabidopsis thaliana GN=SAC7 PE=2 SV=1	PREDICTED: phosphatidylinositide phosphatase SAC1-A-like [Cucumis sativus]
CL10174Contig1	p2	(AG)6	12	301	313	GATCTCGGAGAGTTTTCCTT	55.08	20	CATCACGTGACGCTAATCT	54.66	19	145	--	--	Molecular Function: Rab GTPase activator activity (GO:0005097);; Molecular Function: binding (GO:0005488);; Cellular Component: cytoplasm (GO:0005737);; Cellular Component: cytosol (GO:0005829);; Biological Process: positive regulation of Rab GTPase activity (GO:0032851);; Biological Process: regulation of GTPase activity (GO:0043087);; Cellular Component: intracellular organelle (GO:0043229);;	--	TBC1 domain family member 8 OS=Mus musculus GN=Tbc1d8 PE=2 SV=2	PREDICTED: ecotropic viral integration site 5 protein homolog [Cucumis sativus]
CL10180Contig1	p2	(TC)6	12	301	313	GTTAGTGCCATCTCTCTCCTT	55.21	21	GAGACTCCCATTCATAGTTCA	54.24	21	159	--	--	Biological Process: maltose metabolic process (GO:0000023);; Biological Process: sulfur amino acid metabolic process (GO:0000096);; Molecular Function: iron ion binding (GO:0005506);; Molecular Function: protein binding (GO:0005515);; Cellular Component: plasma membrane (GO:0005886);; Biological Process: glycine catabolic process (GO:0006546);; Biological Process: unsaturated fatty acid biosynthe…	--	Linoleate 13S-lipoxygenase 3-1, chloroplastic OS=Solanum tuberosum GN=LOX3.1 PE=1 SV=1	PREDICTED: LOW QUALITY PROTEIN: linoleate 13S-lipoxygenase 3-1, chloroplastic-like [Cucumis sativus]
CL10307Contig1	p2	(TA)7	14	301	315	AATGGGCTTAATCTTGTGC	55.31	19	GTGTACATCCCTGATCCAAAT	56.29	21	132	--	--	Molecular Function: DNA binding (GO:0003677);; Cellular Component: intracellular part (GO:0044424);; Molecular Function: protein dimerization activity (GO:0046983);;	--	Putative AC transposase OS=Zea mays PE=2 SV=2	hypothetical protein PRUPE_ppa002416mg [Prunus persica]
CL10351Contig1	p2	(TC)6	12	301	313	CCTCCTTCATCTCTATCGTTT	55.15	21	TCAGGTATTGGAACAGAGAAG	54.52	21	148	--	--	Molecular Function: catalytic activity (GO:0003824);; Cellular Component: mitochondrion (GO:0005739);; Cellular Component: chloroplast (GO:0009507);; Cellular Component: plastid (GO:0009536);; Biological Process: gene expression (GO:0010467);; Biological Process: RNA metabolic process (GO:0016070);; Biological Process: cellular macromolecule biosynthetic process (GO:0034645);;	--	Uncharacterized CRM domain-containing protein At3g25440, chloroplastic OS=Arabidopsis thaliana GN=At3g25440 PE=2 SV=1	PREDICTED: uncharacterized protein LOC101215761 [Cucumis sativus]
CL10457Contig1	p3	(TGA)5	15	301	316	GCAGGAAGAAGAGTTAGCTTC	55.25	21	CATCATTTTCCACTTTCCAG	55.65	20	214	[G]	Carbohydrate transport and metabolism	Biological Process: maltose catabolic process (GO:0000025);; Molecular Function: 4-alpha-glucanotransferase activity (GO:0004134);; Cellular Component: cytosol (GO:0005829);; Biological Process: starch catabolic process (GO:0005983);; Biological Process: circadian rhythm (GO:0007623);; Cellular Component: chloroplast (GO:0009507);; Biological Process: plant-type cell wall organization (GO:0009664…	K00705|0.0|vvi:100267188|hypothetical protein LOC100267188	4-alpha-glucanotransferase DPE2 OS=Arabidopsis thaliana GN=DPE2 PE=2 SV=1	PREDICTED: 4-alpha-glucanotransferase DPE2-like [Cucumis sativus]
CL10512Contig1	p3	(ATC)6	18	301	319	AAGTCTGAAGTCTGTCACGAA	55.07	21	GGAAGCTGGAGTGGATACTAC	55.49	21	116	--	--	Cellular Component: plasmodesma (GO:0009506);; Cellular Component: intracellular organelle (GO:0043229);;	--	T-complex protein 11-like protein 1 OS=Homo sapiens GN=TCP11L1 PE=1 SV=1	PREDICTED: uncharacterized protein LOC101216796 [Cucumis sativus]
CL10533Contig1	p2	(CT)6	12	59	71	GAAGGAAAAGAAGAAGTGTCG	55.83	21	GTTGAAGCTGAAGAAGATTCC	55.74	21	149	[U]	Intracellular trafficking, secretion, and vesicular transport	Molecular Function: transporter activity (GO:0005215);; Molecular Function: binding (GO:0005488);; Cellular Component: cytosol (GO:0005829);; Biological Process: protein N-linked glycosylation (GO:0006487);; Biological Process: intracellular protein transport (GO:0006886);; Biological Process: ER to Golgi vesicle-mediated transport (GO:0006888);; Molecular Function: zinc ion binding (GO:0008270);…	K14007|0.0|vvi:100252042|similar to protein transport protein Sec24, putative	Protein transport protein Sec24-like At3g07100 OS=Arabidopsis thaliana GN=At3g07100 PE=2 SV=2	PREDICTED: protein transport protein Sec24-like At3g07100-like [Cucumis sativus]
CL10569Contig1	p2	(TC)8	16	117	133	CTCCTCTCTTTCTTTCTCTGG	55.07	21	AACAGTGAGAAGGGGAAAAT	55.29	20	144	--	--	Biological Process: polysaccharide biosynthetic process (GO:0000271);; Cellular Component: chromosome (GO:0005694);; Cellular Component: cytosol (GO:0005829);; Cellular Component: spindle microtubule (GO:0005876);; Cellular Component: plasma membrane (GO:0005886);; Cellular Component: cell cortex (GO:0005938);; Biological Process: negative regulation of microtubule depolymerization (GO:0007026);;…	--	CLIP-associated protein OS=Arabidopsis thaliana GN=CLASP PE=1 SV=1	PREDICTED: CLIP-associating protein 1-like [Cucumis sativus]
CL10587Contig1	p3	(CTC)5	15	301	316	ATCTTCACCATCAAAGGTCTC	55.71	21	GATTAGAACTAGGGGGTCTGA	54.99	21	150	[D]	Cell cycle control, cell division, chromosome partitioning	Molecular Function: nucleotide binding (GO:0000166);; Cellular Component: cytoplasmic mRNA processing body (GO:0000932);; Cellular Component: nucleus (GO:0005634);; Cellular Component: cytosol (GO:0005829);; Biological Process: leaf morphogenesis (GO:0009965);; Biological Process: root meristem specification (GO:0010071);; Biological Process: primary shoot apical meristem specification (GO:001007…	K12616|0.0|vvi:100259985|hypothetical protein LOC100259985	Enhancer of mRNA-decapping protein 4 OS=Arabidopsis thaliana GN=VCS PE=1 SV=1	PREDICTED: enhancer of mRNA-decapping protein 4-like [Cucumis sativus]
CL10603Contig1	p2	(CT)8	16	20	36	CCCTAACGCTATTTCTCC	52.43	18	ATCGTTTGAAACTGAGCAAG	55.62	20	153	--	--	Biological Process: cell plate assembly (GO:0000919);; Cellular Component: plasma membrane (GO:0005886);;	--	Trafficking protein particle complex subunit 10 OS=Dictyostelium discoideum GN=trapcc10-1 PE=3 SV=1	PREDICTED: trafficking protein particle complex subunit 10-like [Cucumis sativus]
CL10608Contig1	p2	(AG)6	12	301	313	AAACACGATCTCCTCGTTC	55.16	19	CGTGCAAGTAATCTTCTCTTC	54.45	21	146	[E]	Amino acid transport and metabolism	Molecular Function: nucleotide binding (GO:0000166);; Molecular Function: saccharopine dehydrogenase (NADP+, L-glutamate-forming) activity (GO:0004755);; Cellular Component: mitochondrion (GO:0005739);; Cellular Component: cytosol (GO:0005829);; Biological Process: response to sucrose stimulus (GO:0009744);; Biological Process: response to fructose stimulus (GO:0009750);; Biological Process: vege…	K14157|0.0|rcu:RCOM_0708300|aminoadipic semialdehyde synthase, putative (EC:1.5.1.8 1.5.1.10)	Alpha-aminoadipic semialdehyde synthase OS=Arabidopsis thaliana GN=LKR/SDH PE=1 SV=1	PREDICTED: alpha-aminoadipic semialdehyde synthase-like [Cucumis sativus]
CL10620Contig1	p3	(TCT)5	15	301	316	TAGCCACACTCACCATGTTA	55.06	20	GATGGGCAAGAACTAGTGTTA	54.58	21	154	--	--	Molecular Function: nucleotide binding (GO:0000166);; Molecular Function: nucleic acid binding (GO:0003676);; Molecular Function: catalytic activity (GO:0003824);; Molecular Function: protein binding (GO:0005515);; Biological Process: mRNA processing (GO:0006397);; Biological Process: gene expression (GO:0010467);; Cellular Component: intracellular non-membrane-bounded organelle (GO:0043232);; Bi…	K12822|0.0|pop:POPTR_822012|hypothetical protein	RNA-binding protein 25 OS=Mus musculus GN=Rbm25 PE=1 SV=2	PREDICTED: uncharacterized LOC101214372 [Cucumis sativus]
CL10682Contig1	p2	(AT)6	12	179	191	CGGGACATAAAGTCAACTACA	55.36	21	TACCAATAACCACATGCAGA	54.99	20	149	[K]	Transcription	Biological Process: RNA splicing, via endonucleolytic cleavage and ligation (GO:0000394);; Molecular Function: phosphoprotein phosphatase activity (GO:0004721);; Cellular Component: nucleus (GO:0005634);; Cellular Component: spindle (GO:0005819);; Biological Process: transcription from RNA polymerase II promoter (GO:0006366);; Biological Process: mitosis (GO:0007067);; Molecular Function: protein…	--	RNA polymerase II C-terminal domain phosphatase-like 3 OS=Arabidopsis thaliana GN=CPL3 PE=1 SV=2	PREDICTED: LOW QUALITY PROTEIN: RNA polymerase II C-terminal domain phosphatase-like 3-like [Cucumis sativus]
CL10682Contig1	p3	(AGT)5	15	301	316	ATAACCACGACAAATGGAAG	55.09	20	GAAGGTGAAATCTCCGATACT	54.98	21	156	[K]	Transcription	Biological Process: RNA splicing, via endonucleolytic cleavage and ligation (GO:0000394);; Molecular Function: phosphoprotein phosphatase activity (GO:0004721);; Cellular Component: nucleus (GO:0005634);; Cellular Component: spindle (GO:0005819);; Biological Process: transcription from RNA polymerase II promoter (GO:0006366);; Biological Process: mitosis (GO:0007067);; Molecular Function: protein…	--	RNA polymerase II C-terminal domain phosphatase-like 3 OS=Arabidopsis thaliana GN=CPL3 PE=1 SV=2	PREDICTED: LOW QUALITY PROTEIN: RNA polymerase II C-terminal domain phosphatase-like 3-like [Cucumis sativus]
CL10765Contig1	p3	(GAA)5	15	301	316	CTCAAACTTATCACCGTCTGA	55.48	21	AATCCCCACTCTGTCTCTATC	54.79	21	151	--	--	Molecular Function: DNA binding (GO:0003677);; Molecular Function: RNA binding (GO:0003723);; Molecular Function: translation initiation factor activity (GO:0003743);; Cellular Component: nucleus (GO:0005634);; Cellular Component: cytosol (GO:0005829);; Biological Process: translational initiation (GO:0006413);; Biological Process: regulation of translation (GO:0006417);; Biological Process: nucl…	--	Eukaryotic translation initiation factor isoform 4G-1 OS=Oryza sativa subsp. japonica GN=Os04g0499300 PE=2 SV=2	PREDICTED: eukaryotic initiation factor iso-4F subunit p82-34-like [Cucumis sativus]
CL10777Contig1	p2	(AG)7	14	33	47	AGCACCACAACTTCAATTTC	55.28	20	ATACAGCCCTAAAAATGGTG	54.39	20	128	[V]	Defense mechanisms	Biological Process: MAPK cascade (GO:0000165);; Molecular Function: ATP binding (GO:0005524);; Cellular Component: plasma membrane (GO:0005886);; Biological Process: ATP catabolic process (GO:0006200);; Biological Process: protein targeting to membrane (GO:0006612);; Biological Process: drug transmembrane transport (GO:0006855);; Biological Process: response to water deprivation (GO:0009414);; Ce…	--	ABC transporter G family member 32 OS=Arabidopsis thaliana GN=ABCG32 PE=1 SV=1	PREDICTED: ABC transporter G family member 32-like [Cucumis sativus]
CL10777Contig1	p4	(TCTT)5	20	170	190	CACCATTTTTAGGGCTGTAT	54.39	20	TCTTCTCCTTCTTCTCGAAAC	55.47	21	170	[V]	Defense mechanisms	Biological Process: MAPK cascade (GO:0000165);; Molecular Function: ATP binding (GO:0005524);; Cellular Component: plasma membrane (GO:0005886);; Biological Process: ATP catabolic process (GO:0006200);; Biological Process: protein targeting to membrane (GO:0006612);; Biological Process: drug transmembrane transport (GO:0006855);; Biological Process: response to water deprivation (GO:0009414);; Ce…	--	ABC transporter G family member 32 OS=Arabidopsis thaliana GN=ABCG32 PE=1 SV=1	PREDICTED: ABC transporter G family member 32-like [Cucumis sativus]
CL10777Contig1	p3	(TGA)5	15	301	316	TTGATGTTTCTGAGCTTGAG	54.05	20	TGGAAACTCTAGATCAACTGC	54.67	21	146	[V]	Defense mechanisms	Biological Process: MAPK cascade (GO:0000165);; Molecular Function: ATP binding (GO:0005524);; Cellular Component: plasma membrane (GO:0005886);; Biological Process: ATP catabolic process (GO:0006200);; Biological Process: protein targeting to membrane (GO:0006612);; Biological Process: drug transmembrane transport (GO:0006855);; Biological Process: response to water deprivation (GO:0009414);; Ce…	--	ABC transporter G family member 32 OS=Arabidopsis thaliana GN=ABCG32 PE=1 SV=1	PREDICTED: ABC transporter G family member 32-like [Cucumis sativus]
CL10799Contig1	p2	(TG)6	12	42	54	CTGCTCTGCTCTGAGTCTGT	55.89	20	TTCAGAGATAGAGCTTTGTGG	54.85	21	137	--	--	Molecular Function: protein binding (GO:0005515);; Cellular Component: cell wall (GO:0005618);; Cellular Component: nucleus (GO:0005634);; Cellular Component: nuclear envelope (GO:0005635);; Cellular Component: cytosol (GO:0005829);; Biological Process: ribosomal protein import into nucleus (GO:0006610);; Biological Process: intracellular protein transport (GO:0006886);; Biological Process: multi…	--	Importin-5 OS=Mus musculus GN=Ipo5 PE=1 SV=3	PREDICTED: LOW QUALITY PROTEIN: importin-5-like [Cucumis sativus]
CL10799Contig1	p2	(TC)6	12	301	313	AAACCCTTCTCTCTCATCTCA	55.59	21	GGAAGAGGAGAGAATTGAAGA	55.23	21	139	--	--	Molecular Function: protein binding (GO:0005515);; Cellular Component: cell wall (GO:0005618);; Cellular Component: nucleus (GO:0005634);; Cellular Component: nuclear envelope (GO:0005635);; Cellular Component: cytosol (GO:0005829);; Biological Process: ribosomal protein import into nucleus (GO:0006610);; Biological Process: intracellular protein transport (GO:0006886);; Biological Process: multi…	--	Importin-5 OS=Mus musculus GN=Ipo5 PE=1 SV=3	PREDICTED: LOW QUALITY PROTEIN: importin-5-like [Cucumis sativus]
CL10840Contig1	p2	(GA)6	12	70	82	AAATGGTTGCATAGAGGATG	55.17	20	CAACCAGTTGGTGAAACTCTA	55.39	21	144	--	--	Biological Process: compound eye photoreceptor fate commitment (GO:0001752);; Molecular Function: DNA binding (GO:0003677);; Molecular Function: RNA polymerase II distal enhancer sequence-specific DNA binding transcription factor activity (GO:0003705);; Cellular Component: nucleus (GO:0005634);; Cellular Component: transcription factor complex (GO:0005667);; Cellular Component: cytoplasm (GO:0005…	--	BEL1-like homeodomain protein 6 OS=Arabidopsis thaliana GN=BLH6 PE=2 SV=1	PREDICTED: BEL1-like homeodomain protein 6-like [Cucumis sativus]
CL10866Contig1	p2	(CT)7	14	73	87	TTATTTCTGCTGAAGGGAAG	54.78	20	TGAAGTCCAATGAAGTGAGTC	55.25	21	122	[RTKL]	--	Biological Process: MAPK cascade (GO:0000165);; Molecular Function: protein serine/threonine kinase activity (GO:0004674);; Molecular Function: calmodulin-dependent protein kinase activity (GO:0004683);; Molecular Function: calcium-dependent protein kinase C activity (GO:0004698);; Molecular Function: calcium ion binding (GO:0005509);; Molecular Function: ATP binding (GO:0005524);; Cellular Compo…	--	Calcium-dependent protein kinase 34 OS=Arabidopsis thaliana GN=CPK34 PE=2 SV=1	PREDICTED: calcium-dependent protein kinase 32-like [Glycine max]
CL11018Contig1	p2	(TC)6	12	249	261	TCACCTCTCCCTCTCTCTCTA	55.77	21	CAGACACCCTTTATTCTGCTA	54.75	21	149	[E]	Amino acid transport and metabolism	Molecular Function: protein tyrosine kinase activity (GO:0004713);; Molecular Function: spermidine synthase activity (GO:0004766);; Cellular Component: nucleus (GO:0005634);; Cellular Component: cytoplasm (GO:0005737);; Cellular Component: cytosol (GO:0005829);; Cellular Component: plasma membrane (GO:0005886);; Biological Process: protein phosphorylation (GO:0006468);; Biological Process: polyam…	K00797|0.0|rcu:RCOM_1579780|spermidine synthase 1, putative (EC:2.1.1.53)	Spermine synthase OS=Arabidopsis thaliana GN=SPMS PE=1 SV=1	PREDICTED: spermine synthase-like [Cucumis sativus]
CL11041Contig1	p3	(TAT)6	18	136	154	CCCACATAATCCAAATCACT	54.84	20	TGTTCTTCTTCCTACTCAGACC	55.27	22	150	[P]	Inorganic ion transport and metabolism	Molecular Function: inositol-1,4-bisphosphate 1-phosphatase activity (GO:0004441);; Cellular Component: mitochondrion (GO:0005739);; Biological Process: sulfur compound metabolic process (GO:0006790);; Biological Process: nitrogen compound metabolic process (GO:0006807);; Biological Process: response to osmotic stress (GO:0006970);; Biological Process: signal transduction (GO:0007165);; Molecular…	K01082|0.0|pop:POPTR_817763|hypothetical protein	PAP-specific phosphatase HAL2-like OS=Arabidopsis thaliana GN=AHL PE=2 SV=1	PREDICTED: PAP-specific phosphatase HAL2-like [Cucumis sativus]
CL11059Contig1	p3	(TCC)5	15	301	316	ACCGAAGATAACGAGTCTGTA	54.16	21	GGTTAAGTTATCTGGGATTGG	55.28	21	144	--	--	Biological Process: developmental process (GO:0032502);; Cellular Component: cell part (GO:0044464);;	--	UPF0503 protein At3g09070, chloroplastic OS=Arabidopsis thaliana GN=At3g09070 PE=1 SV=1	PREDICTED: UPF0503 protein At3g09070, chloroplastic-like [Cucumis sativus]
CL11072Contig1	p3	(TCT)5	15	301	316	CAGAGAGATGTCTGTGACCAT	55.1	21	ACTACCGCGTTACATTTTGT	54.96	20	122	[O]	Posttranslational modification, protein turnover, chaperones	Biological Process: G2 phase of mitotic cell cycle (GO:0000085);; Biological Process: RNA methylation (GO:0001510);; Molecular Function: binding (GO:0005488);; Molecular Function: ATP binding (GO:0005524);; Cellular Component: centrosome (GO:0005813);; Cellular Component: cytosol (GO:0005829);; Cellular Component: microtubule (GO:0005874);; Biological Process: gluconeogenesis (GO:0006094);; Biolo…	K09500|0.0|pop:POPTR_573918|hypothetical protein	T-complex protein 1 subunit theta OS=Dictyostelium discoideum GN=cct8 PE=3 SV=1	PREDICTED: T-complex protein 1 subunit theta-like [Cucumis sativus]
CL11090Contig1	p3	(TCT)5	15	210	225	TACCGTTCTCCCTTACTTTCT	54.85	21	CCTCCATGGATGAATAGAAGA	56.68	21	154	--	--	Biological Process: G2 phase of mitotic cell cycle (GO:0000085);; Biological Process: developmental process involved in reproduction (GO:0003006);; Molecular Function: RNA binding (GO:0003723);; Cellular Component: nucleus (GO:0005634);; Cellular Component: mitochondrion (GO:0005739);; Biological Process: pyrimidine ribonucleotide biosynthetic process (GO:0009220);; Biological Process: photomorph…	--	Pentatricopeptide repeat-containing protein At5g60960, mitochondrial OS=Arabidopsis thaliana GN=At5g60960 PE=2 SV=1	PREDICTED: pentatricopeptide repeat-containing protein At5g60960, mitochondrial-like [Cucumis sativus]
CL11108Contig1	p3	(GAA)5	15	301	316	GATGAAGTCCCAAACAAAGA	55.17	20	CTCCTTTCTCTTTCTCTCTGC	55.22	21	166	--	--	Molecular Function: structural molecule activity (GO:0005198);; Molecular Function: protein binding (GO:0005515);; Cellular Component: nuclear envelope (GO:0005635);; Cellular Component: cytosol (GO:0005829);; Biological Process: cell surface receptor signaling pathway (GO:0007166);; Biological Process: cell death (GO:0008219);; Biological Process: regulation of signal transduction (GO:0009966);;…	K14306|0.0|vvi:100265039|hypothetical protein LOC100265039	Nuclear pore glycoprotein p62 OS=Rattus norvegicus GN=Nup62 PE=1 SV=1	PREDICTED: nucleoporin nsp1-like [Cucumis sativus]
CL11145Contig1	p3	(CCA)5	15	301	316	TTCTTATCGCACTCTACAAGC	55.06	21	GATTGGTGCTGGTTCTCC	56.39	18	153	--	--	Cellular Component: mitochondrion (GO:0005739);; Cellular Component: vacuole (GO:0005773);; Cellular Component: plasma membrane (GO:0005886);; Cellular Component: plastid (GO:0009536);; Biological Process: pollen development (GO:0009555);; Molecular Function: magnesium ion transmembrane transporter activity (GO:0015095);; Biological Process: magnesium ion transport (GO:0015693);; Biological Proce…	--	Magnesium transporter MRS2-4 OS=Arabidopsis thaliana GN=MRS2-4 PE=1 SV=1	PREDICTED: magnesium transporter MRS2-4-like [Cucumis sativus]
CL11156Contig1	p2	(AC)7	14	285	299	CTCCACTTTACAACAATGAGTG	55	22	CATTTCTAGCTGAGGGATTTC	55.71	21	133	[V]	Defense mechanisms	Molecular Function: ATP binding (GO:0005524);; Cellular Component: mitochondrial inner membrane (GO:0005743);; Cellular Component: plasma membrane (GO:0005886);; Biological Process: ATP catabolic process (GO:0006200);; Molecular Function: xenobiotic-transporting ATPase activity (GO:0008559);; Cellular Component: chloroplast envelope (GO:0009941);; Biological Process: auxin efflux (GO:0010315);; M…	K02021|0.0|vvi:100264781|hypothetical protein LOC100264781	ABC transporter B family member 29, chloroplastic OS=Arabidopsis thaliana GN=ABCB29 PE=1 SV=1	PREDICTED: ABC transporter B family member 29, chloroplastic-like [Cucumis sativus]
CL11273Contig1	p3	(AAG)5	15	301	316	GAGATGCTTGAATCCGTAAG	55.04	20	TTGATGTTTCAGCTTCACTG	54.89	20	150	[DKL]	--	Biological Process: regulation of cyclin-dependent protein kinase activity (GO:0000079);; Biological Process: mitotic cell cycle (GO:0000278);; Biological Process: RNA splicing, via endonucleolytic cleavage and ligation (GO:0000394);; Cellular Component: chromatin (GO:0000785);; Molecular Function: DNA binding (GO:0003677);; Molecular Function: cyclin-dependent protein kinase activity (GO:0004693…	--	Cyclin-T1-4 OS=Oryza sativa subsp. japonica GN=CYCT1-1 PE=2 SV=1	PREDICTED: cyclin-T1-5-like [Cucumis sativus]
CL11282Contig1	p2	(GA)8	16	43	59	TAGAGAGAGAAGGGAAAAGGA	55	21	GCATCTCTTCTTCGTCTTTAC	53.51	21	116	[R]	General function prediction only	Biological Process: negative regulation of transcription from RNA polymerase II promoter (GO:0000122);; Biological Process: nuclear-transcribed mRNA poly(A) tail shortening (GO:0000289);; Biological Process: cytokinesis (GO:0000910);; Molecular Function: nucleic acid binding (GO:0003676);; Molecular Function: histone acetyltransferase activity (GO:0004402);; Molecular Function: poly(A)-specific r…	K10752|0.0|vvi:100247592|hypothetical protein LOC100247592	WD-40 repeat-containing protein MSI1 OS=Solanum lycopersicum GN=MSI1 PE=2 SV=1	PREDICTED: WD-40 repeat-containing protein MSI1-like [Cucumis sativus]
CL11319Contig1	p2	(CT)7	14	240	254	ACTCCCTCACAAAACCTAAAC	54.98	21	AATGGTGCTAGAGGAGTAACC	55.1	21	150	[P]	Inorganic ion transport and metabolism	Biological Process: MAPK cascade (GO:0000165);; Biological Process: response to molecule of bacterial origin (GO:0002237);; Cellular Component: plasma membrane (GO:0005886);; Biological Process: protein targeting to membrane (GO:0006612);; Biological Process: nucleotide transport (GO:0006862);; Biological Process: ER to Golgi vesicle-mediated transport (GO:0006888);; Biological Process: cellular …	--	Ammonium transporter 2 OS=Arabidopsis thaliana GN=AMT2 PE=1 SV=2	PREDICTED: ammonium transporter 2-like [Cucumis sativus]
CL11368Contig1	p3	(GAA)5	15	301	316	CCTAAATTTCCCTCTCCTTCT	55.77	21	CCCAGATCCTAAAAAGTCATC	55.4	21	112	[P]	Inorganic ion transport and metabolism	Molecular Function: signal transducer activity (GO:0004871);; Molecular Function: receptor activity (GO:0004872);; Molecular Function: inorganic phosphate transmembrane transporter activity (GO:0005315);; Molecular Function: sodium:phosphate symporter activity (GO:0005436);; Cellular Component: integral to plasma membrane (GO:0005887);; Biological Process: phosphate-containing compound metabolic …	K14640|0.0|vvi:100247658|hypothetical protein LOC100247658	Inorganic phosphate transporter 2-1, chloroplastic OS=Arabidopsis thaliana GN=PHT2-1 PE=1 SV=1	PREDICTED: inorganic phosphate transporter 2-1, chloroplastic-like [Cucumis sativus]
CL11391Contig1	p2	(CT)6	12	85	95	TGGTTGCTATTAGTTCTCCAG	54.75	21	AAGTGGAATTTCAAGACACC	54.14	20	148	[T]	Signal transduction mechanisms	Molecular Function: protein serine/threonine phosphatase activity (GO:0004722);; Molecular Function: protein binding (GO:0005515);; Cellular Component: nucleus (GO:0005634);; Cellular Component: mitochondrion (GO:0005739);; Cellular Component: plasma membrane (GO:0005886);; Biological Process: glucose catabolic process (GO:0006007);; Biological Process: protein dephosphorylation (GO:0006470);; Bi…	--	Probable protein phosphatase 2C 33 OS=Arabidopsis thaliana GN=PPC6-1 PE=1 SV=1	PREDICTED: probable protein phosphatase 2C 33-like [Cucumis sativus]
CL11397Contig1	p2	(AG)6	12	301	313	GCTTGTATCGTTCGTGACAT	56.21	20	GGCCAACTGTATGTATAATCG	54.84	21	170	[R]	General function prediction only	Biological Process: protein targeting (GO:0006605);; Biological Process: defense response (GO:0006952);; Biological Process: metabolic process (GO:0008152);; Biological Process: cell death (GO:0008219);; Molecular Function: Mo-molybdopterin cofactor sulfurase activity (GO:0008265);; Biological Process: response to temperature stimulus (GO:0009266);; Cellular Component: chloroplast (GO:0009507);; …	--	MOSC domain-containing protein 1, mitochondrial OS=Homo sapiens GN=MARC1 PE=1 SV=1	PREDICTED: uncharacterized protein LOC101206974 [Cucumis sativus]
CL11437Contig1	p3	(AAG)5	15	159	174	ATGAGGAGATTCTGGGAAAT	55.12	20	AACCAATTGTTCTCCCTCTT	55.29	20	158	--	--	Molecular Function: binding (GO:0005488);; Cellular Component: intracellular organelle (GO:0043229);; Cellular Component: intracellular membrane-bounded organelle (GO:0043231);; Cellular Component: cytoplasmic part (GO:0044444);;	--	Uncharacterized protein DDB_G0271670 OS=Dictyostelium discoideum GN=DDB_G0271670 PE=4 SV=1	60S ribosomal protein L34, putative [Ricinus communis]
CL11534Contig1	p2	(TC)7	14	165	179	TCACCAATGAATCTCTCTCTC	54.33	21	ACGTATAAACCCCATAACACC	55.5	21	147	[Q]	Secondary metabolites biosynthesis, transport and catabolism	Biological Process: polysaccharide biosynthetic process (GO:0000271);; Molecular Function: copper ion binding (GO:0005507);; Cellular Component: vacuolar membrane (GO:0005774);; Cellular Component: cytosol (GO:0005829);; Molecular Function: L-ascorbate oxidase activity (GO:0008447);; Biological Process: nucleotide biosynthetic process (GO:0009165);; Cellular Component: plant-type cell wall (GO:00…	--	L-ascorbate oxidase homolog OS=Brassica napus GN=Bp10 PE=2 SV=1	PREDICTED: L-ascorbate oxidase homolog [Cucumis sativus]
CL11560Contig1	p3	(TCT)5	15	301	316	GGCAAAGAACTCTTTATCTCAC	54.97	22	GCTGCGAAACTAACTTACTGA	55.14	21	151	--	--	Molecular Function: DNA binding (GO:0003677);; Molecular Function: protein binding (GO:0005515);; Biological Process: nucleobase-containing compound metabolic process (GO:0006139);; Biological Process: regulation of transcription, DNA-dependent (GO:0006355);; Biological Process: response to osmotic stress (GO:0006970);; Biological Process: signal transduction (GO:0007165);; Biological Process: re…	--	Probable WRKY transcription factor 32 OS=Arabidopsis thaliana GN=WRKY32 PE=2 SV=1	WRKY4 [Cucurbita pepo]
CL11616Contig1	p3	(TCA)5	15	301	316	CAGCAGAAGAGATGTTAGGAT	53.76	21	GTTGCATACAGGAGACATAGG	54.84	21	152	[IQ]	--	Biological Process: long-chain fatty acid metabolic process (GO:0001676);; Molecular Function: long-chain fatty acid-CoA ligase activity (GO:0004467);; Molecular Function: ATP binding (GO:0005524);; Cellular Component: nucleus (GO:0005634);; Cellular Component: cytoplasm (GO:0005737);; Biological Process: polyamine catabolic process (GO:0006598);; Biological Process: protein targeting to membrane…	--	4-coumarate--CoA ligase 2 OS=Nicotiana tabacum GN=4CL2 PE=2 SV=1	4-coumarate:coA ligase 2 [Rubus idaeus]
CL11631Contig1	p3	(CTT)5	15	121	136	TCATTCTCTCTCCACATCTTC	54.33	21	AAAATAATGGGGTCTGGTCT	55.09	20	147	[RTKL]	--	Molecular Function: protein serine/threonine kinase activity (GO:0004674);; Molecular Function: ATP binding (GO:0005524);; Cellular Component: plasma membrane (GO:0005886);; Biological Process: polysaccharide metabolic process (GO:0005976);; Biological Process: protein phosphorylation (GO:0006468);; Biological Process: nitrogen compound metabolic process (GO:0006807);; Biological Process: respons…	--	Probable receptor-like protein kinase At1g80640 OS=Arabidopsis thaliana GN=At1g80640 PE=2 SV=1	PREDICTED: probable receptor-like protein kinase At1g80640-like [Cucumis sativus]
CL12633Contig1	p3	(TGG)6	18	301	319	CCTTTTCAGTTTTGTGGAAG	55.02	20	GGAACGATGAAAACAATAGC	54.88	20	144	--	--	Biological Process: cytokinesis, actomyosin contractile ring assembly (GO:0000915);; Molecular Function: protein binding (GO:0005515);; Cellular Component: cell wall (GO:0005618);; Biological Process: establishment or maintenance of cell polarity (GO:0007163);; Cellular Component: membrane (GO:0016020);; Biological Process: hyphal growth (GO:0030448);; Cellular Component: spitzenkorper (GO:003152…	--	Uncharacterized protein At4g04980 OS=Arabidopsis thaliana GN=At4g04980 PE=2 SV=1	PREDICTED: uncharacterized protein At4g04980-like [Cucumis sativus]
CL12633Contig1	p3	(TGG)5	15	466	481	AGGTACCGCTATTGTTTTCA	55.01	20	CACCACAACCAGTAGTTTCAC	55.59	21	140	--	--	Biological Process: cytokinesis, actomyosin contractile ring assembly (GO:0000915);; Molecular Function: protein binding (GO:0005515);; Cellular Component: cell wall (GO:0005618);; Biological Process: establishment or maintenance of cell polarity (GO:0007163);; Cellular Component: membrane (GO:0016020);; Biological Process: hyphal growth (GO:0030448);; Cellular Component: spitzenkorper (GO:003152…	--	Uncharacterized protein At4g04980 OS=Arabidopsis thaliana GN=At4g04980 PE=2 SV=1	PREDICTED: uncharacterized protein At4g04980-like [Cucumis sativus]
CL13255Contig1	p2	(AG)6	12	301	313	TCGTCAGACAATTCTGATACC	55.22	21	CCCTCTCACTCTCATTCTCAT	55.89	21	164	--	--	Cellular Component: mitochondrion (GO:0005739);; Cellular Component: peroxisomal membrane (GO:0005778);; Cellular Component: membrane (GO:0016020);; Cellular Component: integral to membrane (GO:0016021);; Biological Process: cellular component organization (GO:0016043);; Cellular Component: intracellular membrane-bounded organelle (GO:0043231);; Cellular Component: cytoplasmic part (GO:0044444);;…	--	PXMP2/4 family protein 2 OS=Dictyostelium discoideum GN=DDB_G0278529 PE=3 SV=1	PREDICTED: PXMP2/4 family protein 2-like [Cucumis sativus]
CL13281Contig1	p2	(AG)6	12	301	313	CGAGGATAGACCTAGAAGCTC	55.06	21	CCATACCCATTACCTCTCTTC	55.27	21	152	[F]	Nucleotide transport and metabolism	Molecular Function: magnesium ion binding (GO:0000287);; Molecular Function: DNA binding (GO:0003677);; Molecular Function: deoxyribonuclease activity (GO:0004536);; Molecular Function: nucleoside diphosphate kinase activity (GO:0004550);; Molecular Function: ATP binding (GO:0005524);; Molecular Function: GTP binding (GO:0005525);; Cellular Component: nucleus (GO:0005634);; Cellular Component: mi…	K00940|1e-130|rcu:RCOM_1692110|nucleoside diphosphate kinase, putative (EC:2.7.4.6)	Nucleoside diphosphate kinase III, chloroplastic/mitochondrial OS=Arabidopsis thaliana GN=NDPK3 PE=1 SV=1	PREDICTED: nucleoside diphosphate kinase IV, chloroplastic/mitochondrial-like [Cucumis sativus]
CL13337Contig1	p3	(TGA)5	15	90	105	CTTGTTTCCATTGCAACTTC	55.88	20	CACTAATAGCCCAGATTCAGA	54.67	21	183	--	--	Cellular Component: nucleus (GO:0005634);;	--	--	PREDICTED: uncharacterized LOC101218228 [Cucumis sativus]
CL13343Contig1	p3	(TCT)6	18	173	191	TGACCACTCTCAATCTCATCT	54.71	21	GTTGAACTATGGGAAGAGAGG	55.47	21	148	[J]	Translation, ribosomal structure and biogenesis	Molecular Function: RNA binding (GO:0003723);; Molecular Function: structural constituent of ribosome (GO:0003735);; Cellular Component: ribosome (GO:0005840);; Biological Process: translation (GO:0006412);; Cellular Component: chloroplast (GO:0009507);; Cellular Component: chloroplast thylakoid (GO:0009534);; Cellular Component: chloroplast stroma (GO:0009570);;	--	Ribosome-binding factor PSRP1, chloroplastic OS=Spinacia oleracea GN=PSRP1 PE=1 SV=2	PREDICTED: ribosome-binding factor PSRP1, chloroplastic-like [Cucumis sativus]
CL13520Contig1	p2	(TA)7	14	301	315	CACCTAAAAAGCTTCTTGACC	55.85	21	AGAGAGAGCTTCCAAAACTGT	55	21	166	[S]	Function unknown	Cellular Component: extracellular region (GO:0005576);; Cellular Component: chloroplast thylakoid membrane (GO:0009535);; Cellular Component: chloroplast thylakoid lumen (GO:0009543);;	--	Thylakoid lumenal protein At1g12250, chloroplastic OS=Arabidopsis thaliana GN=At1g12250 PE=1 SV=1	PREDICTED: thylakoid lumenal protein At1g12250, chloroplastic-like [Cucumis sativus]
CL13612Contig1	p2	(GT)6	12	301	313	GAGGGAGAGAAATGTCTATTTG	54.75	22	CAGTCACTCAAACAGAAAAGC	55.25	21	158	--	--	Cellular Component: chloroplast (GO:0009507);;	--	--	PREDICTED: uncharacterized protein LOC100265230 [Vitis vinifera]
CL13654Contig1	p2	(CT)6	12	242	254	CCTTATCAAACCCTTCATCC	56.07	20	AGGAGAAACCCTAAGATGAGA	54.71	21	150	[I]	Lipid transport and metabolism	Molecular Function: catalytic activity (GO:0003824);; Cellular Component: intracellular membrane-bounded organelle (GO:0043231);;	--	Presqualene diphosphate phosphatase OS=Homo sapiens GN=PPAPDC2 PE=1 SV=3	sphingosine-1-phosphate phosphohydrolase, putative [Ricinus communis]
CL13659Contig1	p2	(TG)6	12	301	313	CCCTCTCTCTGTTTTTCTGTT	55.26	21	GTTTCATCCATCCTCTCTTTC	55.34	21	143	--	--	Molecular Function: nucleic acid binding (GO:0003676);; Molecular Function: binding (GO:0005488);; Biological Process: RNA processing (GO:0006396);; Cellular Component: ribonucleoprotein complex (GO:0030529);; Cellular Component: nuclear lumen (GO:0031981);; Cellular Component: intracellular non-membrane-bounded organelle (GO:0043232);;	--	Ribonuclease P protein subunit p25-like protein OS=Mus musculus GN=Rpp25l PE=2 SV=1	PREDICTED: ribonuclease P protein subunit p25-like protein-like [Cucumis sativus]
CL13744Contig1	p2	(CT)9	18	69	87	CACTCTGTGTCTTTTCTCTGC	55.24	21	GTTTCAGGGAACTATTTGGAG	55.47	21	172	--	--	Biological Process: MAPK cascade (GO:0000165);; Biological Process: response to molecule of bacterial origin (GO:0002237);; Biological Process: respiratory burst involved in defense response (GO:0002679);; Cellular Component: nucleus (GO:0005634);; Biological Process: regulation of transcription, DNA-dependent (GO:0006355);; Biological Process: protein targeting to membrane (GO:0006612);; Biologi…	K14487|0.0|rcu:RCOM_0032550|Indole-3-acetic acid-amido synthetase GH3.6, putative	Indole-3-acetic acid-amido synthetase GH3.6 OS=Arabidopsis thaliana GN=GH3.6 PE=1 SV=1	Indole-3-acetic acid-amido synthetase GH3.6, putative [Ricinus communis]
CL13813Contig1	p3	(CAG)5	15	301	316	GAATTTTGGTGGGTCTTCTAC	55.31	21	CTGTGACTGCAAATTATACTGG	55.13	22	181	[K]	Transcription	Cellular Component: PCAF complex (GO:0000125);; Biological Process: RNA splicing, via endonucleolytic cleavage and ligation (GO:0000394);; Molecular Function: DNA binding (GO:0003677);; Molecular Function: sequence-specific DNA binding transcription factor activity (GO:0003700);; Molecular Function: transcription coactivator activity (GO:0003713);; Molecular Function: histone acetyltransferase ac…	K03126|0.0|pop:POPTR_756746|hypothetical protein	Putative uncharacterized protein DDB_G0271606 OS=Dictyostelium discoideum GN=DDB_G0271606 PE=4 SV=1	PREDICTED: uncharacterized protein LOC101227692 [Cucumis sativus]
CL13834Contig1	p3	(TCT)5	15	86	101	TAACAAAGCGAAGAGATTCC	54.77	20	AACTGGTGTTTCTCCGATG	56.02	19	157	--	--	Biological Process: regulation of receptor recycling (GO:0001919);; Molecular Function: protein binding (GO:0005515);; Cellular Component: nucleus (GO:0005634);; Cellular Component: cytoplasm (GO:0005737);; Cellular Component: endosome (GO:0005768);; Biological Process: protein targeting to membrane (GO:0006612);; Biological Process: lysosome organization (GO:0007040);; Biological Process: endoso…	K12198|1e-149|rcu:RCOM_1305670|Charged multivesicular body protein, putative	Charged multivesicular body protein 5 OS=Danio rerio GN=chmp5 PE=2 SV=1	PREDICTED: charged multivesicular body protein 5-like [Cucumis sativus]
CL13899Contig1	p3	(CAG)5	15	301	316	TCAAATTTCTTCACCACCTC	55.17	20	TGTAGAAACTGTTGTGGAACC	55.22	21	138	--	--	Molecular Function: sequence-specific DNA binding transcription factor activity (GO:0003700);; Biological Process: pentose-phosphate shunt (GO:0006098);; Biological Process: rRNA processing (GO:0006364);; Biological Process: regulation of translation (GO:0006417);; Cellular Component: chloroplast thylakoid membrane (GO:0009535);; Biological Process: response to blue light (GO:0009637);; Biologica…	--	--	PREDICTED: uncharacterized protein LOC101206464 [Cucumis sativus]
CL13994Contig1	p3	(TCT)5	15	41	56	AAAACCCCGTTTTTACTCTC	55.07	20	CTTCAGGAGGAATTCTCAAA	54.55	20	133	[P]	Inorganic ion transport and metabolism	Biological Process: transition metal ion transport (GO:0000041);; Molecular Function: protein binding (GO:0005515);; Biological Process: chloride transport (GO:0006821);; Biological Process: oligopeptide transport (GO:0006857);; Biological Process: signal transduction (GO:0007165);; Molecular Function: secondary active sulfate transmembrane transporter activity (GO:0008271);; Biological Process: …	--	Probable sulfate transporter 3.4 OS=Arabidopsis thaliana GN=SULTR3;4 PE=2 SV=1	PREDICTED: probable sulfate transporter 3.4-like [Cucumis sativus]
CL14153Contig1	p3	(TGA)5	15	255	270	ATACTGAGTCGGAAACCAAAC	55.82	21	GGAAGCTGTAGAAGAGGAAGT	54.53	21	149	--	--	Biological Process: MAPK cascade (GO:0000165);; Biological Process: cytokinesis (GO:0000910);; Biological Process: cytokinesis by cell plate formation (GO:0000911);; Biological Process: respiratory burst involved in defense response (GO:0002679);; Molecular Function: SNAP receptor activity (GO:0005484);; Cellular Component: nucleus (GO:0005634);; Cellular Component: cytosol (GO:0005829);; Cellula…	--	SNAP25 homologous protein SNAP33 OS=Arabidopsis thaliana GN=SNAP33 PE=1 SV=1	PREDICTED: putative SNAP25 homologous protein SNAP30-like [Cucumis sativus]
CL14226Contig1	p3	(GAC)5	15	301	316	GCGTTACCTATTACCTTGCTT	55.45	21	TATCTTCAATCTCGTCGTCTC	54.58	21	157	[R]	General function prediction only	Biological Process: polysaccharide biosynthetic process (GO:0000271);; Molecular Function: protein binding (GO:0005515);; Cellular Component: mitochondrion (GO:0005739);; Cellular Component: endoplasmic reticulum (GO:0005783);; Biological Process: asymmetric cell division (GO:0008356);; Biological Process: regulation of cell size (GO:0008361);; Biological Process: nucleotide biosynthetic process …	K13947|0.0|pop:POPTR_803601|PIN6	Auxin efflux carrier component 3 OS=Arabidopsis thaliana GN=PIN3 PE=1 SV=1	auxin efflux carrier component 3-like [Cucumis sativus]
CL14289Contig1	p3	(AAG)5	15	301	316	CTTGGAAGAAGCCATAGAATAG	55.11	22	CAATCATCAATCCAATCCTC	55.3	20	159	[O]	Posttranslational modification, protein turnover, chaperones	Biological Process: G1/S transition of mitotic cell cycle (GO:0000082);; Biological Process: microtubule cytoskeleton organization (GO:0000226);; Molecular Function: protein serine/threonine kinase activity (GO:0004674);; Molecular Function: ubiquitin-protein ligase activity (GO:0004842);; Molecular Function: protein binding (GO:0005515);; Cellular Component: nucleoplasm (GO:0005654);; Cellular C…	K03094|3e-89|rcu:RCOM_1598810|skp1, putative	SKP1-like protein 1A OS=Arabidopsis thaliana GN=SKP1A PE=1 SV=1	SKP1-like protein 1 [Malus domestica]
CL14486Contig1	p3	(GCA)5	15	301	316	TCCATTCAGAGGAGTACAAGA	54.92	21	CAGTTTCCTCAATTGAAAGC	55.09	20	152	--	--	Molecular Function: DNA binding (GO:0003677);; Molecular Function: ubiquitin-protein ligase activity (GO:0004842);; Cellular Component: nucleus (GO:0005634);; Biological Process: mitosis (GO:0007067);; Molecular Function: zinc ion binding (GO:0008270);; Biological Process: response to water deprivation (GO:0009414);; Cellular Component: plasmodesma (GO:0009506);; Molecular Function: metal ion bin…	--	Zinc finger A20 and AN1 domain-containing stress-associated protein 8 OS=Oryza sativa subsp. japonica GN=SAP8 PE=2 SV=1	PREDICTED: zinc finger A20 and AN1 domain-containing stress-associated protein 8-like isoform 1 [Cucumis sativus]
CL14513Contig1	p2	(AG)6	12	301	313	CCGACTTTCTGCTTCTTTC	55.23	19	AGTTCACAAACACCTCCTTATC	55	22	160	--	--	--	--	--	PREDICTED: uncharacterized LOC101218277 [Cucumis sativus]
CL14563Contig1	p3	(TTC)5	15	158	173	CTCTAATCAACGCTTCTTCAG	54.63	21	CGAATCAGACTGAGAATCAGA	55.52	21	158	--	--	Cellular Component: plastid (GO:0009536);;	--	Mitochondrial protein import protein ZIM17 OS=Saccharomyces cerevisiae (strain ATCC 204508 / S288c) GN=ZIM17 PE=1 SV=2	PREDICTED: uncharacterized protein LOC101212325 [Cucumis sativus]
CL14592Contig1	p3	(AAG)6	18	161	179	TATCGAGACAATCACCTCTTC	54.41	21	TATCGACTCCAATGACTTGAC	55.22	21	130	--	--	Molecular Function: transcription regulatory region sequence-specific DNA binding (GO:0000976);; Molecular Function: sequence-specific DNA binding transcription factor activity (GO:0003700);; Cellular Component: nucleus (GO:0005634);; Biological Process: response to desiccation (GO:0009269);; Biological Process: response to cold (GO:0009409);; Biological Process: response to water deprivation (GO…	K09338|6e-49|ath:AT3G61890|ATHB-12 (ARABIDOPSIS THALIANA HOMEOBOX 12)	Homeobox-leucine zipper protein ATHB-12 OS=Arabidopsis thaliana GN=ATHB-12 PE=2 SV=1	PREDICTED: homeobox-leucine zipper protein ATHB-7-like [Cucumis sativus]
CL14606Contig1	p2	(GA)8	16	301	317	GGCAAGTAAGATCTTGAGAAAG	55.13	22	TAACTCTTCCACTTTCCTTCC	55.2	21	139	[P]	Inorganic ion transport and metabolism	Biological Process: transition metal ion transport (GO:0000041);; Molecular Function: ATP binding (GO:0005524);; Cellular Component: vacuolar membrane (GO:0005774);; Cellular Component: plasma membrane (GO:0005886);; Biological Process: metabolic process (GO:0008152);; Biological Process: cellular process (GO:0009987);; Biological Process: response to metal ion (GO:0010038);; Molecular Function: …	K01534|0.0|ath:AT4G30110|HMA2	Cadmium/zinc-transporting ATPase HMA2 OS=Arabidopsis thaliana GN=HMA2 PE=2 SV=1	PREDICTED: cadmium/zinc-transporting ATPase HMA2-like [Cucumis sativus]
CL14724Contig1	p2	(TC)7	14	118	132	TCTAAACCCTTCATCTCTTCC	55.12	21	GAGGGAAATTAGGGTTTGTT	54.83	20	152	[C]	Energy production and conversion	Biological Process: MAPK cascade (GO:0000165);; Molecular Function: binding (GO:0005488);; Biological Process: pentose-phosphate shunt (GO:0006098);; Biological Process: rRNA processing (GO:0006364);; Biological Process: protein targeting to membrane (GO:0006612);; Biological Process: signal transduction (GO:0007165);; Biological Process: response to cold (GO:0009409);; Cellular Component: chloro…	K02113|1e-109|pop:POPTR_740620|hypothetical protein	ATP synthase delta chain, chloroplastic OS=Nicotiana tabacum GN=ATPD PE=2 SV=1	PREDICTED: ATP synthase delta chain, chloroplastic-like [Cucumis sativus]
CL14737Contig1	p2	(TC)6	12	301	313	CAAACCGTAGACTCATCGTAA	55.52	21	AAAAGCAGAGGCCTGAGT	55.05	18	177	--	--	Cellular Component: extracellular region (GO:0005576);; Cellular Component: plasma membrane (GO:0005886);;	--	--	PREDICTED: uncharacterized protein LOC101217379 [Cucumis sativus]
CL14748Contig1	p2	(AT)7	14	301	315	CTTATCTGGTCGTGTGGATT	55.07	20	TGTTCTACGAGAAGTTCATCC	54.5	21	151	[O]	Posttranslational modification, protein turnover, chaperones	Biological Process: nematode larval development (GO:0002119);; Molecular Function: ubiquitin-protein ligase activity (GO:0004842);; Molecular Function: ATP binding (GO:0005524);; Cellular Component: nucleus (GO:0005634);; Cellular Component: cytoplasm (GO:0005737);; Cellular Component: microtubule associated complex (GO:0005875);; Cellular Component: plasma membrane (GO:0005886);; Biological Proc…	K06689|1e-107|pop:POPTR_586577|hypothetical protein	Ubiquitin-conjugating enzyme E2 10 OS=Arabidopsis thaliana GN=UBC10 PE=1 SV=1	hypothetical protein PRUPE_ppa012628mg [Prunus persica]
CL14815Contig1	p2	(AT)6	12	301	313	ATTGATCCGGAGTCTTCTTAG	55.15	21	CACCTTCCTAGTTCAAGTTCA	54.61	21	159	--	--	Cellular Component: nuclear envelope (GO:0005635);; Cellular Component: vacuolar membrane (GO:0005774);; Cellular Component: Golgi apparatus (GO:0005794);; Cellular Component: cytosol (GO:0005829);; Cellular Component: plasma membrane (GO:0005886);; Biological Process: transcription, DNA-dependent (GO:0006351);; Biological Process: protein glycosylation (GO:0006486);; Biological Process: ER to Go…	--	Growth-regulating factor 12 OS=Oryza sativa subsp. japonica GN=GRF12 PE=2 SV=1	PREDICTED: growth-regulating factor 9-like, partial [Cucumis sativus]
CL14830Contig1	p3	(ATC)7	21	301	322	CTCCTTCTCCTTCACTTCACT	55.25	21	GATCAGAGGAAGAAGGATTTG	55.52	21	152	--	--	Cellular Component: intracellular membrane-bounded organelle (GO:0043231);; Cellular Component: cytoplasmic part (GO:0044444);;	--	--	hypothetical protein PRUPE_ppa022555mg [Prunus persica]
CL14839Contig1	p3	(TAA)5	15	301	316	CTTGGTACTTTTGACACTGCT	54.72	21	TGATAATGGAGGAGGAAGAGT	55.39	21	180	--	--	Biological Process: respiratory burst involved in defense response (GO:0002679);; Molecular Function: DNA binding (GO:0003677);; Molecular Function: sequence-specific DNA binding transcription factor activity (GO:0003700);; Molecular Function: protein binding (GO:0005515);; Cellular Component: nucleolus (GO:0005730);; Cellular Component: plasma membrane (GO:0005886);; Biological Process: mRNA exp…	--	Ethylene-responsive transcription factor ERF113 OS=Arabidopsis thaliana GN=ERF113 PE=2 SV=1	AP2 domain transcription factor RAP2 [Cucumis melo subsp. melo]
CL67Contig3	p4	(ATTG)5	20	301	321	CTACACCACTATCTCCGATCA	55.26	21	CTCTCTAGGGTTTGTTCTTCC	54.79	21	141	[R]	General function prediction only	Biological Process: G2/M transition of mitotic cell cycle (GO:0000086);; Cellular Component: Golgi membrane (GO:0000139);; Biological Process: RNA splicing, via endonucleolytic cleavage and ligation (GO:0000394);; Molecular Function: GTPase activity (GO:0003924);; Molecular Function: receptor binding (GO:0005102);; Molecular Function: GTP binding (GO:0005525);; Cellular Component: mitochondrion (…	K07901|1e-149|rcu:RCOM_0249780|protein with unknown function (EC:3.1.4.12)	Ras-related protein RABE1c OS=Arabidopsis thaliana GN=RABE1C PE=1 SV=1	hypothetical protein PRUPE_ppa011286mg [Prunus persica]
CL105Contig1	p2	(TC)6	12	301	313	CATAGTGTTAGCCCATTCTGA	55.44	21	GTTCCTATTTGCACTTATAGCC	54.99	22	168	[I]	Lipid transport and metabolism	Cellular Component: Golgi membrane (GO:0000139);; Molecular Function: carboxylesterase activity (GO:0004091);; Cellular Component: extracellular region (GO:0005576);; Cellular Component: endoplasmic reticulum membrane (GO:0005789);; Biological Process: fatty acid catabolic process (GO:0009062);; Cellular Component: chloroplast (GO:0009507);; Biological Process: response to abscisic acid stimulus …	--	Isoprenylcysteine alpha-carbonyl methylesterase ICME OS=Arabidopsis thaliana GN=ICME PE=2 SV=1	Alpha/beta-Hydrolases superfamily protein [Theobroma cacao]
CL131Contig2	p3	(CTG)6	18	301	319	TATTCTCAGGTGGTCTTTGTC	54.34	21	TCACTTTCAGAGAGCACAGTT	55.24	21	179	--	--	Molecular Function: DNA binding (GO:0003677);; Molecular Function: transcription cofactor activity (GO:0003712);; Molecular Function: protein binding (GO:0005515);; Cellular Component: nucleus (GO:0005634);; Cellular Component: nucleoplasm (GO:0005654);; Cellular Component: cytoplasm (GO:0005737);; Biological Process: regulation of transcription, DNA-dependent (GO:0006355);; Biological Process: t…	--	Transcriptional corepressor SEUSS OS=Arabidopsis thaliana GN=SEU PE=1 SV=1	hypothetical protein PRUPE_ppa001261mg [Prunus persica]
CL234Contig2	p3	(GAA)5	15	170	185	CTTCTCTGCCTCTTTCTTCAT	55.5	21	GATTCATCAAAACGATCTCC	54.56	20	161	--	--	--	--	--	PREDICTED: uncharacterized LOC101213774 [Cucumis sativus]
CL297Contig1	p3	(GAG)5	15	301	316	ATAGTCGTGCACCATGTAGAG	55.37	21	CCCTGATGTCATAAGAGTAGAA	53.68	22	155	--	--	Molecular Function: binding (GO:0005488);;	--	--	hypothetical protein VITISV_040275 [Vitis vinifera]
CL345Contig1	p2	(AG)6	12	301	313	GAACAGGATCGGATCAACTAT	55.67	21	CTTCCTTTCTCTCTCATCACA	54.62	21	161	--	--	Biological Process: regionalization (GO:0003002);; Molecular Function: double-stranded RNA binding (GO:0003725);; Molecular Function: protein binding (GO:0005515);; Cellular Component: nucleus (GO:0005634);; Cellular Component: cytoplasm (GO:0005737);; Biological Process: heart development (GO:0007507);; Molecular Function: cytoskeletal protein binding (GO:0008092);; Biological Process: response …	--	Double-stranded RNA-binding protein 2 OS=Arabidopsis thaliana GN=DRB2 PE=1 SV=1	PREDICTED: double-stranded RNA-binding protein 2-like [Cucumis sativus]
CL348Contig1	p2	(TC)6	12	200	212	GTTGGAGTAATCCGTTGAGAT	55.74	21	GTAAAAGAGGCGGTCTCATAG	55.81	21	154	--	--	--	--	--	PREDICTED: LOW QUALITY PROTEIN: uncharacterized LOC101221628 [Cucumis sativus]
CL400Contig1	p3	(TCA)6	18	301	319	CATCTGTTATTGCTCAACCTC	54.97	21	TAATGTGATGACCAACATGG	55.07	20	172	[G]	Carbohydrate transport and metabolism	Biological Process: polysaccharide biosynthetic process (GO:0000271);; Cellular Component: extracellular region (GO:0005576);; Biological Process: pattern specification process (GO:0007389);; Biological Process: regulation of cell size (GO:0008361);; Biological Process: defense response, incompatible interaction (GO:0009814);; Biological Process: auxin polar transport (GO:0009926);; Biological Pr…	K01728|0.0|vvi:100232902|PL1	Probable pectate lyase 15 OS=Arabidopsis thaliana GN=At4g13710 PE=2 SV=1	PREDICTED: probable pectate lyase 15-like [Cucumis sativus]
CL435Contig1	p3	(TCT)5	15	76	91	CCTTCTGTTTCTGATCTCTCA	54.62	21	TGAGAAGGTAGGGTTTTATCC	55.01	21	131	--	--	Biological Process: negative regulation of transcription from RNA polymerase II promoter (GO:0000122);; Biological Process: microtubule cytoskeleton organization (GO:0000226);; Biological Process: cytokinesis by cell plate formation (GO:0000911);; Cellular Component: cytoplasmic mRNA processing body (GO:0000932);; Molecular Function: poly(A)-specific ribonuclease activity (GO:0004535);; Cellular …	K12604|0.0|rcu:RCOM_1609680|ccr4-not transcription complex, putative	CCR4-NOT transcription complex subunit 1 OS=Mus musculus GN=Cnot1 PE=1 SV=2	PREDICTED: LOW QUALITY PROTEIN: CCR4-NOT transcription complex subunit 1-like [Cucumis sativus]
CL640Contig1	p3	(ATA)5	15	301	316	GAACAGGCGATAACTTTTTG	55.14	20	ATGATCCTGTGATGGACATT	55.05	20	153	--	--	Biological Process: mitotic cell cycle (GO:0000278);; Biological Process: respiratory burst involved in defense response (GO:0002679);; Molecular Function: protein binding (GO:0005515);; Molecular Function: profilin binding (GO:0005522);; Cellular Component: nucleus (GO:0005634);; Cellular Component: plasma membrane (GO:0005886);; Cellular Component: cell-cell junction (GO:0005911);; Biological P…	--	Formin-like protein 4 OS=Arabidopsis thaliana GN=FH4 PE=1 SV=2	PREDICTED: formin-like protein 8-like [Cucumis sativus]
CL664Contig1	p3	(TTC)5	15	301	316	TTGATCTCTTCGACTATGTCAC	54.52	22	CAGCGATTAGGTCATCATTAG	55.12	21	139	[R]	General function prediction only	Biological Process: nuclear-transcribed mRNA catabolic process (GO:0000956);; Molecular Function: aminoacyl-tRNA ligase activity (GO:0004812);; Molecular Function: binding (GO:0005488);; Biological Process: transcription, DNA-dependent (GO:0006351);; Biological Process: regulation of mitotic cell cycle (GO:0007346);; Biological Process: regulation of gene expression (GO:0010468);; Cellular Compon…	--	Uncharacterized protein DDB_G0283697 OS=Dictyostelium discoideum GN=DDB_G0283697 PE=4 SV=1	PREDICTED: LOW QUALITY PROTEIN: uncharacterized protein LOC101231950 [Cucumis sativus]
CL777Contig1	p3	(AAT)7	21	301	322	ATGTCAAGATCAGGAATTGG	54.95	20	CGACATCGTTATGAGAAGAAG	55.15	21	127	--	--	Molecular Function: DNA binding (GO:0003677);; Molecular Function: sequence-specific DNA binding transcription factor activity (GO:0003700);; Cellular Component: nucleus (GO:0005634);; Biological Process: regulation of transcription, DNA-dependent (GO:0006355);; Biological Process: response to stress (GO:0006950);; Biological Process: fatty acid catabolic process (GO:0009062);; Biological Process…	--	Transcription factor bHLH66 OS=Arabidopsis thaliana GN=BHLH66 PE=2 SV=1	PREDICTED: uncharacterized protein LOC101211609 [Cucumis sativus]
CL835Contig1	p2	(AT)7	14	301	315	GGTAATTTGGAGATGGATGA	54.88	20	CTCTACAATTTTCTCACCTTCC	54.83	22	150	--	--	Biological Process: ER to Golgi vesicle-mediated transport (GO:0006888);; Cellular Component: plasmodesma (GO:0009506);; Cellular Component: chloroplast (GO:0009507);; Biological Process: systemic acquired resistance (GO:0009627);; Cellular Component: integral to membrane (GO:0016021);; Biological Process: response to endoplasmic reticulum stress (GO:0034976);; Biological Process: amino acid impo…	--	--	PREDICTED: uncharacterized membrane protein YMR155W-like [Cucumis sativus]
CL880Contig1	p3	(TCT)5	15	301	316	GTCCAGGCAAACATGATAGT	55.06	20	CATGGATTCCTTGAAATCAG	55.56	20	162	[O]	Posttranslational modification, protein turnover, chaperones	Biological Process: mitotic cell cycle (GO:0000278);; Molecular Function: binding (GO:0005488);; Molecular Function: ATP binding (GO:0005524);; Cellular Component: nucleus (GO:0005634);; Cellular Component: mitochondrion (GO:0005739);; Cellular Component: endoplasmic reticulum (GO:0005783);; Biological Process: response to abscisic acid stimulus (GO:0009737);; Cellular Component: membrane (GO:001…	--	Probable mitochondrial chaperone BCS1-B OS=Dictyostelium discoideum GN=bcsl1b PE=3 SV=1	PREDICTED: probable mitochondrial chaperone BCS1-B-like [Cucumis sativus]
CL884Contig1	p2	(TC)6	12	301	313	CATCATGATTGTGTTCTTGC	54.92	20	GAGAACAGTTTGCTGGTAATG	55.05	21	168	[Z]	Cytoskeleton	Molecular Function: nucleotide binding (GO:0000166);; Biological Process: microtubule cytoskeleton organization (GO:0000226);; Biological Process: cytokinesis by cell plate formation (GO:0000911);; Biological Process: microtubule bundle formation (GO:0001578);; Biological Process: regionalization (GO:0003002);; Molecular Function: microtubule motor activity (GO:0003777);; Cellular Component: cent…	--	Kinesin-4 OS=Arabidopsis thaliana GN=ATK4 PE=1 SV=2	PREDICTED: kinesin-4-like [Cucumis sativus]
CL1378Contig1	p3	(TCA)5	15	202	217	AGGAAAGATAGCTTCATCACC	55.14	21	TCGATAAGCGTTTGTTGAG	55.02	19	155	--	--	Molecular Function: protein binding (GO:0005515);; Biological Process: epidermal cell differentiation (GO:0009913);; Biological Process: root development (GO:0048364);; Biological Process: regulation of meristem development (GO:0048509);; Biological Process: organ development (GO:0048513);; Biological Process: developmental growth (GO:0048589);; Biological Process: regulation of cellular process …	--	Zinc finger protein JACKDAW OS=Arabidopsis thaliana GN=JKD PE=1 SV=1	PREDICTED: zinc finger protein MAGPIE-like [Cucumis sativus]
CL1417Contig1	p3	(CTT)5	15	301	316	TCAAGTCCATCAATTTCTCC	55.08	20	TCAGAATCAACGGGATTAGT	54.71	20	149	[R]	General function prediction only	Biological Process: response to osmotic stress (GO:0006970);; Biological Process: metabolic process (GO:0008152);; Biological Process: gibberellin metabolic process (GO:0009685);; Biological Process: response to organic substance (GO:0010033);; Biological Process: response to metal ion (GO:0010038);; Molecular Function: oxidoreductase activity (GO:0016491);; Cellular Component: intracellular memb…	--	Gibberellin 2-beta-dioxygenase 8 OS=Arabidopsis thaliana GN=GA2OX8 PE=1 SV=2	hypothetical protein PRUPE_ppa019257mg [Prunus persica]
CL1421Contig1	p2	(AG)7	14	301	315	GGCATGATTCTTAAACAAGG	54.9	20	TCCTTCTTCCTTCTTCTTCAC	55.31	21	229	--	--	Biological Process: embryonic axis specification (GO:0000578);; Molecular Function: ubiquitin-protein ligase activity (GO:0004842);; Cellular Component: cytoplasm (GO:0005737);; Molecular Function: transcription factor binding (GO:0008134);; Cellular Component: nuclear lumen (GO:0031981);; Biological Process: protein ubiquitination involved in ubiquitin-dependent protein catabolic process (GO:004…	--	E3 ubiquitin ligase BIG BROTHER OS=Arabidopsis thaliana GN=BB PE=1 SV=1	PREDICTED: uncharacterized protein LOC101216634 [Cucumis sativus]
CL1509Contig1	p3	(CTC)5	15	301	316	GACTTTTCAATTGGTGATGG	55.47	20	GTCCACATCCACCGATAAT	55.53	19	166	[M]	Cell wall/membrane/envelope biogenesis	Cellular Component: mitochondrion (GO:0005739);;	--	UPF0392 protein RCOM_0530710 OS=Ricinus communis GN=RCOM_0699480 PE=3 SV=1	PREDICTED: UPF0392 protein At1g27200-like [Cucumis sativus]
CL1554Contig1	p3	(CAG)5	15	301	316	CAACAAGAAACTGGACAACA	54.62	20	CTGATGGTCTAAGGAAAATCC	55.4	21	132	[Q]	Secondary metabolites biosynthesis, transport and catabolism	Molecular Function: monooxygenase activity (GO:0004497);; Molecular Function: binding (GO:0005488);; Biological Process: response to UV (GO:0009411);; Biological Process: response to organic substance (GO:0010033);; Cellular Component: membrane (GO:0016020);; Biological Process: monoterpenoid biosynthetic process (GO:0016099);; Molecular Function: oxidoreductase activity, acting on paired donors,…	--	Probable (S)-N-methylcoclaurine 3&apos;-hydroxylase isozyme 2 OS=Coptis japonica GN=CYP80B2 PE=2 SV=1	(S)-N-methylcoclaurine 3&apos;-hydroxylase isozyme, putative [Ricinus communis]
CL1575Contig1	p3	(AAG)6	18	301	319	ATATTCTTGAGGCTGATCCAC	55.83	21	TCATCTAGCTCAGGTGAACAT	54.95	21	161	[RTKL]	--	Biological Process: maltose metabolic process (GO:0000023);; Molecular Function: nucleotide binding (GO:0000166);; Biological Process: regulation of cell growth (GO:0001558);; Biological Process: response to molecule of bacterial origin (GO:0002237);; Molecular Function: protein serine/threonine kinase activity (GO:0004674);; Molecular Function: steroid binding (GO:0005496);; Molecular Function: …	--	Receptor-like serine/threonine-protein kinase At1g78530 OS=Arabidopsis thaliana GN=At1g78530 PE=2 SV=1	PREDICTED: receptor-like serine/threonine-protein kinase At1g78530-like, partial [Cucumis sativus]
CL1751Contig1	p3	(TTC)6	18	67	85	CTTCACCAATCAATCCATTC	55.39	20	CCATGTCTCTGTTTTTGGAT	55.03	20	182	[S]	Function unknown	Molecular Function: catalytic activity (GO:0003824);; Molecular Function: binding (GO:0005488);; Biological Process: cellular protein modification process (GO:0006464);; Biological Process: defense response (GO:0006952);; Biological Process: organelle organization (GO:0006996);; Biological Process: signal transduction (GO:0007165);; Biological Process: anatomical structure morphogenesis (GO:00096…	--	Receptor-like protein 12 OS=Arabidopsis thaliana GN=RLP12 PE=2 SV=2	hypothetical protein [Cucumis melo subsp. melo]
CL1983Contig1	p4	(GAAA)5	20	171	191	CTCCTCGAATATACCCAATTC	55.36	21	ACCCACTAAACCTGTTGATTAC	54.89	22	146	--	--	Cellular Component: chloroplast (GO:0009507);;	--	--	PREDICTED: uncharacterized protein LOC101218337 [Cucumis sativus]
CL1997Contig1	p3	(AAG)5	15	148	163	CCTTAAGTGACCCACAATTT	54.24	20	CCTGTAGAATCATGGAAATAGG	55.46	22	148	--	--	Molecular Function: nucleic acid binding (GO:0003676);;	--	--	PREDICTED: uncharacterized protein LOC101211175 [Cucumis sativus]
CL2246Contig1	p3	(GAA)5	15	301	316	ACTTGTCCCGGTAAGTCTCT	55.39	20	GACCACTCTTCCTCAAATTCT	55.01	21	156	[I]	Lipid transport and metabolism	Molecular Function: carboxylesterase activity (GO:0004091);; Molecular Function: binding (GO:0005488);; Cellular Component: nucleus (GO:0005634);; Cellular Component: cytosol (GO:0005829);; Biological Process: defense response (GO:0006952);; Biological Process: response to abiotic stimulus (GO:0009628);; Biological Process: gibberellic acid mediated signaling pathway (GO:0009740);; Biological Pro…	--	Probable carboxylesterase 2 OS=Arabidopsis thaliana GN=CXE2 PE=2 SV=1	PREDICTED: probable carboxylesterase 2-like [Cucumis sativus]
CL2264Contig1	p2	(TG)7	14	301	315	CAACCTTTGTCCTACTCAGTG	54.97	21	AAGTCCGAATAGAAGTAGCAGA	55.17	22	151	[R]	General function prediction only	Cellular Component: cytoplasm (GO:0005737);; Biological Process: cellular aromatic compound metabolic process (GO:0006725);; Biological Process: response to stress (GO:0006950);; Biological Process: response to abscisic acid stimulus (GO:0009737);; Biological Process: embryo development ending in seed dormancy (GO:0009793);; Biological Process: flavonoid biosynthetic process (GO:0009813);; Biolog…	--	Protein SRG1 OS=Arabidopsis thaliana GN=SRG1 PE=2 SV=1	PREDICTED: protein SRG1-like [Cucumis sativus]
CL2311Contig1	p3	(GGA)6	18	301	319	CTAATCAACAACCCCACAAA	56.02	20	GGTGACCACAAGTTCGTAATA	55.18	21	155	--	--	Biological Process: MAPK cascade (GO:0000165);; Biological Process: response to molecule of bacterial origin (GO:0002237);; Biological Process: respiratory burst involved in defense response (GO:0002679);; Cellular Component: nucleus (GO:0005634);; Biological Process: regulation of transcription, DNA-dependent (GO:0006355);; Biological Process: protein targeting to membrane (GO:0006612);; Biologi…	K14487|0.0|vvi:100248869|hypothetical protein LOC100248869	Indole-3-acetic acid-amido synthetase GH3.17 OS=Arabidopsis thaliana GN=GH3.17 PE=1 SV=1	PREDICTED: indole-3-acetic acid-amido synthetase GH3.17-like [Cucumis sativus]
CL2329Contig1	p3	(TAT)7	21	301	322	ACATACAGCTCCTAACCGTCT	55.6	21	GAAGTCTCGTAAACGGTCTC	54.04	20	209	--	--	Cellular Component: nucleus (GO:0005634);;	--	Mediator-associated protein 1 OS=Arabidopsis thaliana GN=At4g25210 PE=1 SV=1	PREDICTED: uncharacterized LOC101219457 [Cucumis sativus]
CL2369Contig1	p3	(TGA)5	15	301	316	GATGGATGAACTAGGCTGTTT	55.9	21	GCTTCAGGAAATGATCAACA	56.24	20	181	[O]	Posttranslational modification, protein turnover, chaperones	Cellular Component: nucleus (GO:0005634);; Biological Process: metabolic process (GO:0008152);; Molecular Function: amino acid binding (GO:0016597);;	--	[Protein-PII] uridylyltransferase OS=Rhizobium loti (strain MAFF303099) GN=glnD PE=3 SV=1	PREDICTED: uncharacterized protein LOC101219701 [Cucumis sativus]
CL2435Contig1	p2	(GA)12	24	70	80	TATAGATTCAGAAGGGGAGGT	54.53	21	CTGCTACTTTCTGCTTACTGG	54.75	21	144	[G]	Carbohydrate transport and metabolism	Molecular Function: aldose 1-epimerase activity (GO:0004034);; Biological Process: carbohydrate metabolic process (GO:0005975);; Biological Process: galactose metabolic process (GO:0006012);; Molecular Function: carbohydrate binding (GO:0030246);; Molecular Function: glucose-6-phosphate 1-epimerase activity (GO:0047938);;	K01792|0.0|rcu:RCOM_1690740|aldose 1-epimerase, putative	Putative glucose-6-phosphate 1-epimerase OS=Cenchrus ciliaris PE=2 SV=1	PREDICTED: putative glucose-6-phosphate 1-epimerase-like [Cucumis sativus]
CL2497Contig1	p2	(TA)7	14	69	83	CACATAACACAACTACGCTCA	54.91	21	CCAACCTTGTAGGGAAACTAT	54.97	21	133	[S]	Function unknown	Biological Process: transition metal ion transport (GO:0000041);; Molecular Function: nucleotide binding (GO:0000166);; Biological Process: response to molecule of bacterial origin (GO:0002237);; Molecular Function: protein kinase activity (GO:0004672);; Molecular Function: protein serine/threonine kinase activity (GO:0004674);; Molecular Function: protein binding (GO:0005515);; Molecular Functio…	--	Probable LRR receptor-like serine/threonine-protein kinase At4g26540 OS=Arabidopsis thaliana GN=At4g26540 PE=1 SV=1	PREDICTED: probable LRR receptor-like serine/threonine-protein kinase At4g26540-like [Cucumis sativus]
CL2543Contig1	p2	(TA)6	12	65	77	GCTTTGCTGACGATTTTACT	54.88	20	CTTAAACCTCACCGGACTATT	55.12	21	199	[R]	General function prediction only	Biological Process: MAPK cascade (GO:0000165);; Biological Process: NK T cell differentiation (GO:0001865);; Biological Process: adaptive immune response (GO:0002250);; Biological Process: respiratory burst involved in defense response (GO:0002679);; Molecular Function: protein serine/threonine kinase activity (GO:0004674);; Molecular Function: copper ion binding (GO:0005507);; Molecular Function…	--	MACPF domain-containing protein CAD1 OS=Arabidopsis thaliana GN=CAD1 PE=2 SV=1	PREDICTED: MACPF domain-containing protein CAD1-like [Cucumis sativus]
CL2641Contig1	p2	(GA)7	14	301	315	GTAAAGAAATCCGGAGCAC	54.85	19	CAGAAATAAACCCTCCTCTGT	55.07	21	192	--	--	Biological Process: tryptophan biosynthetic process (GO:0000162);; Molecular Function: signal transducer activity (GO:0004871);; Molecular Function: binding (GO:0005488);; Cellular Component: nucleus (GO:0005634);; Cellular Component: cytoplasm (GO:0005737);; Biological Process: transcription, DNA-dependent (GO:0006351);; Biological Process: defense response (GO:0006952);; Biological Process: res…	--	Scarecrow-like protein 8 OS=Arabidopsis thaliana GN=SCL8 PE=2 SV=1	PREDICTED: scarecrow-like protein 8-like [Cucumis sativus]
CL2670Contig1	p2	(GA)6	12	221	233	CTCTCTTATTGTTTGGCACA	53.97	20	GAAAGGCCACATGAAATTAG	54.9	20	153	[R]	General function prediction only	Biological Process: long-chain fatty acid metabolic process (GO:0001676);; Molecular Function: epoxide hydrolase activity (GO:0004301);; Molecular Function: non-membrane spanning protein tyrosine kinase activity (GO:0004715);; Molecular Function: protein binding (GO:0005515);; Cellular Component: peroxisome (GO:0005777);; Cellular Component: cytosol (GO:0005829);; Biological Process: inflammatory…	--	Bifunctional epoxide hydrolase 2 OS=Homo sapiens GN=EPHX2 PE=1 SV=2	PREDICTED: bifunctional epoxide hydrolase 2-like [Cucumis sativus]
CL2673Contig1	p4	(TCCA)5	20	301	321	GTAGAACAGCTGACACCTGAG	55.1	21	CGACGGATCTATACCTAAAAAG	55.02	22	156	[OC]	--	Molecular Function: protein disulfide isomerase activity (GO:0003756);; Cellular Component: nucleus (GO:0005634);; Cellular Component: endoplasmic reticulum (GO:0005783);; Cellular Component: plasma membrane (GO:0005886);; Biological Process: protein folding (GO:0006457);; Cellular Component: integral to membrane (GO:0016021);; Biological Process: second-messenger-mediated signaling (GO:0019932);…	--	Protein disulfide-isomerase 5-4 OS=Arabidopsis thaliana GN=PDIL5-4 PE=2 SV=1	PREDICTED: protein disulfide-isomerase 5-4-like [Cucumis sativus]
CL2743Contig1	p2	(TC)9	18	301	319	TGCGTATCTACATTTCTCCTC	54.65	21	ATCCAGAGAACACCAGTTAGC	55.98	21	155	--	--	Cellular Component: mitochondrion (GO:0005739);; Cellular Component: endosome (GO:0005768);; Cellular Component: vacuolar membrane (GO:0005774);; Cellular Component: Golgi apparatus (GO:0005794);; Cellular Component: trans-Golgi network (GO:0005802);; Cellular Component: plasma membrane (GO:0005886);; Cellular Component: integral to plasma membrane (GO:0005887);; Biological Process: N-terminal pr…	--	Transmembrane 9 superfamily member 4 OS=Pongo abelii GN=TM9SF4 PE=2 SV=1	PREDICTED: transmembrane 9 superfamily member 4-like [Cucumis sativus]
CL2782Contig1	p3	(GAA)6	18	301	319	GGTCGAGACTTTTCAGTTTTG	56.59	21	CATAATCGTTTTGGTGGAAC	55.51	20	145	[E]	Amino acid transport and metabolism	Molecular Function: nucleotide binding (GO:0000166);; Molecular Function: protein kinase activity (GO:0004672);; Molecular Function: protein binding (GO:0005515);; Cellular Component: Golgi apparatus (GO:0005794);; Cellular Component: plasma membrane (GO:0005886);; Biological Process: intra-Golgi vesicle-mediated transport (GO:0006891);; Biological Process: defense response (GO:0006952);; Biologi…	--	Nitrate transporter 1.1 OS=Arabidopsis thaliana GN=NRT1.1 PE=1 SV=1	PREDICTED: probable LRR receptor-like serine/threonine-protein kinase At2g24230-like [Cucumis sativus]
CL2811Contig1	p2	(GA)8	16	270	286	ACAAAGTTGCTCTTCTCGAC	54.71	20	TGTTTGCTGTCTACCTCTGAT	55.04	21	141	--	--	--	--	F-box/kelch-repeat protein At3g06240 OS=Arabidopsis thaliana GN=At3g06240 PE=2 SV=1	PREDICTED: F-box protein CPR30-like [Cucumis sativus]
CL2825Contig1	p2	(CT)6	12	23	35	CTCTCCCGCATTCATAAAC	55.74	19	CATTGTTGGCTGTGTTTTC	55	19	136	--	--	Molecular Function: dimethylallyltranstransferase activity (GO:0004161);; Molecular Function: nucleocytoplasmic transporter activity (GO:0005487);; Molecular Function: protein binding (GO:0005515);; Cellular Component: nuclear envelope (GO:0005635);; Cellular Component: mitochondrion (GO:0005739);; Biological Process: negative regulation of flower development (GO:0009910);; Cellular Component: ch…	K14289|0.0|vvi:100258918|hypothetical protein LOC100258918	Protein HASTY 1 OS=Arabidopsis thaliana GN=HST1 PE=1 SV=1	PREDICTED: protein HASTY 1-like [Cucumis sativus]
CL2951Contig1	p3	(TCT)5	15	301	316	CAGAATCTTCAACTCCATCAC	54.74	21	ACCTGAGGAAGAAGAAGGTAA	54.79	21	173	--	--	Cellular Component: membrane (GO:0016020);; Cellular Component: cell part (GO:0044464);;	--	Protein TIME FOR COFFEE OS=Arabidopsis thaliana GN=TIC PE=1 SV=2	PREDICTED: protein TIME FOR COFFEE-like [Cucumis sativus]
CL2956Contig1	p3	(ATG)5	15	301	316	TGAAGAGAACCTCTCTGATGA	55.04	21	CATACTCAAAAACTGCTGCTC	55.38	21	160	--	--	--	--	Uncharacterized protein DDB_G0271670 OS=Dictyostelium discoideum GN=DDB_G0271670 PE=4 SV=1	PREDICTED: uncharacterized protein LOC101229468 [Cucumis sativus]
CL2974Contig1	p3	(CTT)5	15	109	124	GACAAGGGGTCTCTTTTTGTA	55.95	21	ATATCATCCTCTCCCGTAATC	54.72	21	182	--	--	--	--	--	hypothetical protein VITISV_040039 [Vitis vinifera]
CL3016Contig1	p3	(ATA)6	18	301	319	CAATCCTGAGCAAAGAAAAG	55.26	20	GTCAGAGTTCGAAGTAAAATCC	54.81	22	150	--	--	Molecular Function: magnesium ion binding (GO:0000287);; Biological Process: defense response (GO:0006952);; Cellular Component: chloroplast (GO:0009507);; Cellular Component: plastid (GO:0009536);; Biological Process: gibberellin metabolic process (GO:0009685);; Biological Process: gibberellin biosynthetic process (GO:0009686);; Biological Process: gibberellic acid mediated signaling pathway (GO…	K04120|0.0|vvi:100259570|hypothetical protein LOC100259570	Ent-copalyl diphosphate synthase, chloroplastic OS=Pisum sativum PE=2 SV=1	PREDICTED: LOW QUALITY PROTEIN: ent-copalyl diphosphate synthase, chloroplastic-like [Cucumis sativus]
CL3075Contig1	p2	(CT)7	14	109	123	ATCAGATCTGGGAGAAGAGAC	54.9	21	CCGATCAGTATGAGAGAAATG	54.9	21	171	[R]	General function prediction only	Biological Process: microtubule cytoskeleton organization (GO:0000226);; Biological Process: cytokinesis by cell plate formation (GO:0000911);; Molecular Function: structural molecule activity (GO:0005198);; Molecular Function: transporter activity (GO:0005215);; Molecular Function: protein binding (GO:0005515);; Cellular Component: extracellular space (GO:0005615);; Cellular Component: mitochond…	K05236|0.0|vvi:100246276|hypothetical protein LOC100246276	Coatomer subunit alpha-1 OS=Arabidopsis thaliana GN=At1g62020 PE=1 SV=2	PREDICTED: coatomer subunit alpha-1-like [Cucumis sativus]
CL3137Contig1	p3	(AAG)5	15	301	316	ATCAGATCTCAACCGTGAAA	55.64	20	CTCTTCCCATTTCCTTCTTC	55.51	20	180	[P]	Inorganic ion transport and metabolism	Molecular Function: magnesium ion binding (GO:0000287);; Biological Process: system process (GO:0003008);; Molecular Function: phospholipid-translocating ATPase activity (GO:0004012);; Molecular Function: protein binding (GO:0005515);; Molecular Function: ATP binding (GO:0005524);; Molecular Function: phospholipid transporter activity (GO:0005548);; Cellular Component: mitochondrion (GO:0005739);…	K01530|0.0|rcu:RCOM_1058020|phospholipid-transporting atpase, putative (EC:3.6.3.1)	Phospholipid-transporting ATPase 1 OS=Arabidopsis thaliana GN=ALA1 PE=1 SV=1	PREDICTED: phospholipid-transporting ATPase 1-like [Cucumis sativus]
CL3166Contig1	p3	(GCA)7	21	301	322	GCTCAGCAAAACAACCTATC	55.11	20	TTGCAGTATATGTGCAGAGTG	55	21	156	--	--	Biological Process: long-chain fatty acid metabolic process (GO:0001676);; Biological Process: defense response to insect (GO:0002213);; Molecular Function: transcription cofactor activity (GO:0003712);; Molecular Function: binding (GO:0005488);; Cellular Component: nucleus (GO:0005634);; Cellular Component: mitochondrion (GO:0005739);; Biological Process: transcription, DNA-dependent (GO:0006351…	--	Mediator of RNA polymerase II transcription subunit 15a OS=Arabidopsis thaliana GN=MED15A PE=1 SV=1	PREDICTED: uncharacterized protein LOC101220890 [Cucumis sativus]
CL3209Contig1	p3	(TTC)6	18	291	309	GGAGTTCGAAGTTCGTAGAGT	55.29	21	AGTCCACACTTTATCTGAAGC	53.67	21	151	[O]	Posttranslational modification, protein turnover, chaperones	Molecular Function: nucleotide binding (GO:0000166);; Cellular Component: chromatin (GO:0000785);; Molecular Function: protein binding (GO:0005515);; Molecular Function: ATP binding (GO:0005524);; Cellular Component: nucleolus (GO:0005730);; Cellular Component: peroxisome (GO:0005777);; Cellular Component: peroxisomal membrane (GO:0005778);; Cellular Component: cytosol (GO:0005829);; Cellular Com…	K13338|0.0|vvi:100259773|hypothetical protein LOC100259773	Peroxisome biogenesis protein 1 OS=Arabidopsis thaliana GN=PEX1 PE=2 SV=2	PREDICTED: peroxisome biogenesis protein 1-like [Cucumis sativus]
CL3209Contig1	p3	(TGC)5	15	301	316	ACGTTCTCCTATATGGACCTC	54.86	21	TAGAAAAGATATCCCGGACAG	55.99	21	156	[O]	Posttranslational modification, protein turnover, chaperones	Molecular Function: nucleotide binding (GO:0000166);; Cellular Component: chromatin (GO:0000785);; Molecular Function: protein binding (GO:0005515);; Molecular Function: ATP binding (GO:0005524);; Cellular Component: nucleolus (GO:0005730);; Cellular Component: peroxisome (GO:0005777);; Cellular Component: peroxisomal membrane (GO:0005778);; Cellular Component: cytosol (GO:0005829);; Cellular Com…	K13338|0.0|vvi:100259773|hypothetical protein LOC100259773	Peroxisome biogenesis protein 1 OS=Arabidopsis thaliana GN=PEX1 PE=2 SV=2	PREDICTED: peroxisome biogenesis protein 1-like [Cucumis sativus]
CL3225Contig1	p3	(TTC)5	15	154	169	CAGTATTCGTCACCTGCTATC	55.01	21	AGGAAAATCACACACCACAT	55.23	20	157
CL3234Contig1	p2	(CT)10	20	301	321	CTGAATAGAGTGGAAGGGTTT	55.07	21	GGAAGCATCCATTACACATAC	54.6	21	171	--	--	Molecular Function: binding (GO:0005488);; Cellular Component: extracellular region (GO:0005576);; Cellular Component: nucleus (GO:0005634);; Cellular Component: Golgi apparatus (GO:0005794);; Cellular Component: plasma membrane (GO:0005886);; Biological Process: metabolic process (GO:0008152);; Molecular Function: zinc ion binding (GO:0008270);; Biological Process: cellular process (GO:0009987);…	--	Probable protein S-acyltransferase 7 OS=Arabidopsis thaliana GN=PAT07 PE=1 SV=1	PREDICTED: probable S-acyltransferase At3g26935-like [Cucumis sativus]
CL3303Contig1	p3	(TCT)5	15	301	316	GTTGGTTGGTTCTCTCTCTCT	55.07	21	GATAAAACCTACGACGACCAC	56.25	21	140	--	--	Biological Process: immune system process (GO:0002376);; Molecular Function: protein binding (GO:0005515);; Cellular Component: nucleus (GO:0005634);; Cellular Component: cytoplasm (GO:0005737);; Biological Process: defense response (GO:0006952);; Biological Process: signal transduction (GO:0007165);; Biological Process: response to endogenous stimulus (GO:0009719);; Biological Process: protein u…	--	U-box domain-containing protein 30 OS=Arabidopsis thaliana GN=PUB30 PE=2 SV=1	PREDICTED: uncharacterized protein LOC100267175 [Vitis vinifera]
CL3322Contig1	p3	(TCT)5	15	301	316	TGTTGTTCAAAGAAGTGGAG	53.79	20	ACACCCACGAGTTAAATAGGT	55.3	21	156	--	--	Cellular Component: mitochondrion (GO:0005739);;	--	--	PREDICTED: uncharacterized protein LOC101210768 [Cucumis sativus]
CL3571Contig1	p3	(CAA)5	15	156	171	GTTTTCTTTTGCAAGAGCTG	55.49	20	ATTGACGAATCGGATAACTG	55.17	20	147	[S]	Function unknown	Biological Process: mitotic cell cycle (GO:0000278);; Molecular Function: ribonuclease activity (GO:0004540);; Molecular Function: protein binding (GO:0005515);; Cellular Component: nucleus (GO:0005634);; Cellular Component: plasma membrane (GO:0005886);; Biological Process: glycolysis (GO:0006096);; Biological Process: rRNA processing (GO:0006364);; Biological Process: water transport (GO:000683…	K03538|2e-96|vvi:100258470|similar to ribonuclease P family protein	Ribonuclease P protein subunit p29 OS=Pongo abelii GN=POP4 PE=2 SV=1	PREDICTED: uncharacterized protein LOC101226615 [Cucumis sativus]
CL3885Contig1	p3	(CGT)5	15	301	316	CTCTGCACATGAATCTTCTTC	55.08	21	GCTCTTCTCATGATTCCATTC	56.38	21	161	--	--	Biological Process: nuclear division (GO:0000280);; Biological Process: cytokinesis by cell plate formation (GO:0000911);; Cellular Component: nucleus (GO:0005634);; Biological Process: acetyl-CoA metabolic process (GO:0006084);; Biological Process: nucleolus organization (GO:0007000);; Biological Process: cell proliferation (GO:0008283);; Biological Process: regulation of flower development (GO:…	--	--	hypothetical protein PRUPE_ppa006090mg [Prunus persica]
CL4284Contig1	p2	(TC)7	14	111	125	GTTCCAAATTCGACAGTTTC	54.74	20	CCTTGAACTTGATTCAGAGC	55.07	20	121	--	--	Cellular Component: extracellular region (GO:0005576);; Cellular Component: cytoplasm (GO:0005737);; Cellular Component: cytosol (GO:0005829);; Biological Process: carbohydrate metabolic process (GO:0005975);; Biological Process: nitrogen compound metabolic process (GO:0006807);; Biological Process: oligosaccharide metabolic process (GO:0009311);; Cellular Component: plant-type cell wall (GO:0009…	--	Alpha-galactosidase mel1 OS=Schizosaccharomyces pombe (strain 972 / ATCC 24843) GN=mel1 PE=3 SV=1	PREDICTED: uncharacterized protein LOC101227042 [Cucumis sativus]
CL4284Contig1	p3	(CTT)5	15	301	316	CCAATCAAGATCACTGCTTT	55.37	20	TTACATACCCATCAGCATCA	54.9	20	152	--	--	Cellular Component: extracellular region (GO:0005576);; Cellular Component: cytoplasm (GO:0005737);; Cellular Component: cytosol (GO:0005829);; Biological Process: carbohydrate metabolic process (GO:0005975);; Biological Process: nitrogen compound metabolic process (GO:0006807);; Biological Process: oligosaccharide metabolic process (GO:0009311);; Cellular Component: plant-type cell wall (GO:0009…	--	Alpha-galactosidase mel1 OS=Schizosaccharomyces pombe (strain 972 / ATCC 24843) GN=mel1 PE=3 SV=1	PREDICTED: uncharacterized protein LOC101227042 [Cucumis sativus]
CL4778Contig1	p3	(ATC)7	21	209	230	CCCACAATTTGAAGGACTAA	55.23	20	GATGATGACGATAACGATGAC	55.42	21	153	[QR]	--	Cellular Component: nucleus (GO:0005634);; Biological Process: iron ion transport (GO:0006826);; Biological Process: pollen development (GO:0009555);; Biological Process: pollen tube growth (GO:0009860);; Biological Process: response to zinc ion (GO:0010043);; Biological Process: phloem transport (GO:0010233);; Molecular Function: nicotianamine synthase activity (GO:0030410);; Biological Process:…	K05953|1e-132|rcu:RCOM_1435160|Nicotianamine synthase, putative (EC:2.5.1.43)	Probable nicotianamine synthase 4 OS=Arabidopsis thaliana GN=NAS4 PE=2 SV=1	Nicotianamine synthase, putative [Ricinus communis]
CL7145Contig1	p2	(TC)6	12	301	313	TGATGCTCAAACAAAGAGG	54.78	19	CTCTCTCCTCTCTTTCTCTCTCT	54.65	23	133	--	--	Cellular Component: extracellular region (GO:0005576);; Biological Process: response to chitin (GO:0010200);; Molecular Function: transferase activity, transferring glycosyl groups (GO:0016757);;	--	EGF domain-specific O-linked N-acetylglucosamine transferase OS=Rattus norvegicus GN=Eogt PE=2 SV=1	PREDICTED: uncharacterized protein LOC101213872 [Cucumis sativus]
CL8033Contig1	p3	(GAA)5	15	72	87	GGCTCTTCATAAACCTTCACT	55.22	21	CTTCCACTAGATGATCAAACG	54.98	21	153	[K]	Transcription	Biological Process: immune system process (GO:0002376);; Molecular Function: DNA binding (GO:0003677);; Molecular Function: DNA-directed RNA polymerase activity (GO:0003899);; Molecular Function: protein binding (GO:0005515);; Cellular Component: nucleus (GO:0005634);; Cellular Component: nucleoplasm (GO:0005654);; Cellular Component: DNA-directed RNA polymerase I complex (GO:0005736);; Cellular …	K03002|0.0|vvi:100241130|hypothetical protein LOC100241130	DNA-directed RNA polymerase I subunit RPA2 OS=Homo sapiens GN=POLR1B PE=1 SV=2	PREDICTED: DNA-directed RNA polymerase I subunit RPA2-like [Cucumis sativus]
CL8403Contig1	p2	(TC)9	18	301	319	CATGGGAACAAGAAACTGAT	55.03	20	AAGAGTTGGTACAGCATCTGA	55.04	21	152	--	--	Molecular Function: binding (GO:0005488);;	--	--	hypothetical protein PRUPE_ppa006812mg [Prunus persica]
CL8540Contig1	p2	(AG)6	12	301	313	GAAGAAAGAAGATAGGGTGGA	55.12	21	TTTCAGACAACTAACCCACAC	55.22	21	153	--	--	Biological Process: protein polyubiquitination (GO:0000209);; Biological Process: embryonic axis specification (GO:0000578);; Molecular Function: sequence-specific DNA binding transcription factor activity (GO:0003700);; Molecular Function: transcription corepressor activity (GO:0003714);; Molecular Function: ubiquitin-protein ligase activity (GO:0004842);; Molecular Function: binding (GO:0005488…	--	Transcription factor RF2b OS=Oryza sativa subsp. japonica GN=RF2b PE=1 SV=1	PREDICTED: uncharacterized protein LOC101215855 [Cucumis sativus]
CL8576Contig1	p2	(CT)6	12	22	34	CTTCCTCCTCATCTCAACAC	54.7	20	CGGTTTGTTAAGGGGTTTA	55.26	19	154	[I]	Lipid transport and metabolism	Molecular Function: triglyceride lipase activity (GO:0004806);; Biological Process: lipid metabolic process (GO:0006629);; Biological Process: response to stress (GO:0006950);; Biological Process: multicellular organismal development (GO:0007275);; Molecular Function: phosphatidylcholine 1-acylhydrolase activity (GO:0008970);; Cellular Component: chloroplast (GO:0009507);; Biological Process: res…	--	Phospholipase A1-Ibeta2, chloroplastic OS=Arabidopsis thaliana GN=At4g16820 PE=1 SV=2	PREDICTED: phospholipase A1-Ibeta2, chloroplastic-like [Cucumis sativus]
CL8580Contig1	p3	(CGG)5	15	301	316	ATGGAAGAAAGAGAAGTGGTC	55.01	21	TACTGTCCCTATCAACTCCAA	54.82	21	141	--	--	Cellular Component: intracellular membrane-bounded organelle (GO:0043231);;	--	F-box/kelch-repeat protein At5g26960 OS=Arabidopsis thaliana GN=At5g26960 PE=2 SV=1	PREDICTED: F-box/kelch-repeat protein At5g26960-like [Cucumis sativus]
CL8603Contig1	p2	(TA)6	12	136	148	TGTCTCTCTTTCGAATTTCC	54.54	20	GCAGCCATAGAATCAGTACC	54.9	20	126	[R]	General function prediction only	Molecular Function: nucleotide binding (GO:0000166);; Biological Process: mitotic cell cycle (GO:0000278);; Molecular Function: RNA binding (GO:0003723);; Molecular Function: binding (GO:0005488);; Molecular Function: protein binding (GO:0005515);; Cellular Component: nucleus (GO:0005634);; Cellular Component: nucleolus (GO:0005730);; Cellular Component: cytoplasm (GO:0005737);; Cellular Componen…	--	Splicing regulatory glutamine/lysine-rich protein 1 OS=Rattus norvegicus GN=Srek1 PE=1 SV=1	PREDICTED: protein MEI2-like 2-like [Cucumis sativus]
CL8623Contig1	p3	(TGA)5	15	301	316	ATCGTCTCCAACAAATCATC	54.93	20	AGAAACCAAACCCCTTACTCT	56.03	21	158	[J]	Translation, ribosomal structure and biogenesis	Biological Process: nuclear-transcribed mRNA catabolic process, nonsense-mediated decay (GO:0000184);; Molecular Function: protein binding (GO:0005515);; Cellular Component: cytoplasm (GO:0005737);; Cellular Component: cytosol (GO:0005829);; Cellular Component: plasma membrane (GO:0005886);; Biological Process: translational termination (GO:0006415);; Biological Process: regulation of translation…	K03265|0.0|vvi:100242471|hypothetical protein LOC100242471	Eukaryotic peptide chain release factor subunit 1-3 OS=Arabidopsis thaliana GN=ERF1-3 PE=2 SV=1	PREDICTED: eukaryotic peptide chain release factor subunit 1-3-like [Cucumis sativus]
CL8656Contig1	p3	(CTT)5	15	90	105	CTAACTGCCATCTCGATTCT	54.61	20	AGGGAAAGGAGAGACGATAAT	56.04	21	132	[E]	Amino acid transport and metabolism	Molecular Function: 5-methyltetrahydropteroyltriglutamate-homocysteine S-methyltransferase activity (GO:0003871);; Molecular Function: copper ion binding (GO:0005507);; Cellular Component: cell wall (GO:0005618);; Cellular Component: vacuolar membrane (GO:0005774);; Cellular Component: peroxisome (GO:0005777);; Cellular Component: Golgi apparatus (GO:0005794);; Cellular Component: cytosol (GO:000…	K00549|0.0|pop:POPTR_679841|MS1	5-methyltetrahydropteroyltriglutamate--homocysteine methyltransferase OS=Catharanthus roseus GN=METE PE=2 SV=1	PREDICTED: 5-methyltetrahydropteroyltriglutamate--homocysteine methyltransferase-like isoform 1 [Cucumis sativus]
CL8732Contig1	p2	(TC)7	14	26	40	CCTCGCCTCGCCGGTTAT	65.69	18	TCTTCATGAGCTTTCTCTGAC	54.78	21	162	--	--	--	--	Protein FAM179B OS=Mus musculus GN=Fam179b PE=2 SV=2	PREDICTED: uncharacterized protein LOC101211897 [Cucumis sativus]
CL8841Contig1	p2	(TA)6	12	301	313	AGTATATCAAGCAAGCAGCAG	55.09	21	GGGTGAGAAGCTATCCATAAT	54.95	21	148	[G]	Carbohydrate transport and metabolism	Molecular Function: argininosuccinate lyase activity (GO:0004056);; Molecular Function: glyceraldehyde-3-phosphate dehydrogenase (NAD+) (phosphorylating) activity (GO:0004365);; Cellular Component: cytosol (GO:0005829);; Biological Process: glucose metabolic process (GO:0006006);; Biological Process: glycolysis (GO:0006096);; Biological Process: rRNA processing (GO:0006364);; Biological Process: …	K05298|0.0|rcu:RCOM_1443660|glyceraldehyde 3-phosphate dehydrogenase, putative (EC:1.2.1.13)	Glyceraldehyde-3-phosphate dehydrogenase A, chloroplastic OS=Pisum sativum GN=GAPA PE=2 SV=2	PREDICTED: glyceraldehyde-3-phosphate dehydrogenase A, chloroplastic-like [Cucumis sativus]
CL8853Contig1	p2	(TA)6	12	104	116	CCCACCATGCGTATTATT	54.22	18	TTGATCTCACTTCATCATCG	54.51	20	160	[RTKL]	--	Biological Process: microtubule cytoskeleton organization (GO:0000226);; Biological Process: cytokinesis by cell plate formation (GO:0000911);; Molecular Function: protein serine/threonine kinase activity (GO:0004674);; Molecular Function: ATP binding (GO:0005524);; Cellular Component: plasma membrane (GO:0005886);; Biological Process: protein phosphorylation (GO:0006468);; Biological Process: mu…	--	L-type lectin-domain containing receptor kinase VIII.1 OS=Arabidopsis thaliana GN=LECRK81 PE=1 SV=1	PREDICTED: L-type lectin-domain containing receptor kinase VIII.1-like [Cucumis sativus]
CL8890Contig1	p2	(CT)6	12	301	313	GGCAAGATCTGGAAGAGTAGT	55.21	21	TATGTTGGTCTGTTTGCTTG	54.77	20	170	[F]	Nucleotide transport and metabolism	Biological Process: RNA methylation (GO:0001510);; Molecular Function: GMP synthase (glutamine-hydrolyzing) activity (GO:0003922);; Molecular Function: asparagine synthase (glutamine-hydrolyzing) activity (GO:0004066);; Molecular Function: ATP binding (GO:0005524);; Cellular Component: cytosol (GO:0005829);; Biological Process: GMP biosynthetic process (GO:0006177);; Biological Process: asparagin…	K01951|0.0|vvi:100246139|hypothetical protein LOC100246139	GMP synthase [glutamine-hydrolyzing] OS=Aquifex aeolicus (strain VF5) GN=guaA PE=3 SV=1	PREDICTED: GMP synthase [glutamine-hydrolyzing]-like [Cucumis sativus]
CL8995Contig1	p3	(AAT)6	18	100	118	TGAAGCACTGTTCTCTTTCTC	54.87	21	GTGAGAATCAGCAAGAACGTA	55.63	21	157	--	--	Molecular Function: binding (GO:0005488);; Cellular Component: extracellular region (GO:0005576);; Cellular Component: endoplasmic reticulum (GO:0005783);; Cellular Component: Golgi apparatus (GO:0005794);; Biological Process: cellulose biosynthetic process (GO:0030244);; Biological Process: Golgi vesicle transport (GO:0048193);;	--	Uncharacterized protein At5g49945 OS=Arabidopsis thaliana GN=At5g49945 PE=1 SV=1	PREDICTED: uncharacterized protein At5g49945-like [Cucumis sativus]
CL9042Contig1	p3	(TCA)7	21	301	322	CCAGACGACTTCATTATCATC	54.72	21	AGGAAGAGGATCCTAACTGG	54.96	20	146	--	--	Cellular Component: mitochondrion (GO:0005739);; Biological Process: regulation of transcription, DNA-dependent (GO:0006355);; Cellular Component: chloroplast stroma (GO:0009570);; Biological Process: chloroplast organization (GO:0009658);;	--	Uncharacterized protein DDB_G0271670 OS=Dictyostelium discoideum GN=DDB_G0271670 PE=4 SV=1	PREDICTED: uncharacterized protein LOC101210591 [Cucumis sativus]
CL9049Contig1	p3	(CTT)5	15	116	131	ATTCTCATTCCCCAAACTCT	55.21	20	GGATATGGAAGAAGAAGGAGA	55.04	21	160	--	--	Biological Process: defense response (GO:0006952);; Molecular Function: hydrolase activity (GO:0016787);; Biological Process: cellular metabolic process (GO:0044237);; Biological Process: regulation of cellular process (GO:0050794);; Biological Process: response to other organism (GO:0051707);; Biological Process: cellular response to stimulus (GO:0051716);; Biological Process: organic substance …	--	Basic 7S globulin OS=Glycine max GN=BG PE=1 SV=2	PREDICTED: basic 7S globulin-like [Cucumis sativus]
CL9073Contig1	p2	(CT)6	12	301	313	TCATTCTCTCTCCTCCATTCT	55.51	21	CAGATCCTGAAACAGAAGATG	54.92	21	143	--	--	Molecular Function: nucleic acid binding (GO:0003676);; Cellular Component: cytoplasm (GO:0005737);; Cellular Component: cytoskeleton (GO:0005856);; Cellular Component: plasma membrane (GO:0005886);; Biological Process: mRNA processing (GO:0006397);; Biological Process: RNA splicing (GO:0008380);; Cellular Component: membrane (GO:0016020);; Cellular Component: nuclear lumen (GO:0031981);; Biologi…	--	Hyccin OS=Gallus gallus GN=FAM126A PE=2 SV=1	PREDICTED: uncharacterized protein LOC101215901 [Cucumis sativus]
CL9213Contig1	p3	(ACC)6	18	90	108	GAAGAAAACTCTGAAGAACTCG	55.16	22	CACCAACAACGCATAGATTAG	55.96	21	145	[G]	Carbohydrate transport and metabolism	Cellular Component: cytosol (GO:0005829);; Biological Process: glycogen catabolic process (GO:0005980);; Biological Process: glucose metabolic process (GO:0006006);; Molecular Function: glycogen phosphorylase activity (GO:0008184);; Biological Process: response to cold (GO:0009409);; Biological Process: response to water deprivation (GO:0009414);; Cellular Component: amyloplast (GO:0009501);; Cel…	K00688|0.0|pop:POPTR_712800|hypothetical protein	Alpha-1,4 glucan phosphorylase L isozyme, chloroplastic/amyloplastic OS=Vicia faba GN=PHO1 PE=1 SV=2	PREDICTED: alpha-1,4 glucan phosphorylase L isozyme, chloroplastic/amyloplastic-like [Cucumis sativus]
CL9228Contig1	p3	(TTG)5	15	301	316	TTAAAGCTGGATCTTTGAGG	54.78	20	AACCAGTTGATCTCTCTGTCTC	55.09	22	138	[J]	Translation, ribosomal structure and biogenesis	Molecular Function: protein binding (GO:0005515);; Cellular Component: cytoplasm (GO:0005737);; Biological Process: translation (GO:0006412);; Biological Process: cell proliferation (GO:0008283);; Biological Process: peptidyl-diphthamide biosynthetic process from peptidyl-histidine (GO:0017183);;	--	Diphthamide biosynthesis protein 1 OS=Gallus gallus GN=DPH1 PE=2 SV=1	PREDICTED: diphthamide biosynthesis protein 1-like [Cucumis sativus]
CL9628Contig1	p3	(CCT)5	15	267	282	CCATGTTCACTTCCTACAACA	56.12	21	AATGGTGCCTACCTGACTTAC	55.85	21	152	--	--	Cellular Component: extracellular region (GO:0005576);; Cellular Component: plasma membrane (GO:0005886);; Biological Process: autophagy (GO:0006914);; Cellular Component: plasmodesma (GO:0009506);; Biological Process: defense response to bacterium (GO:0042742);;	--	Cysteine-rich repeat secretory protein 12 OS=Arabidopsis thaliana GN=CRRSP12 PE=2 SV=2	DUF26 domain-containing protein 1 precursor, putative [Ricinus communis]
CL9628Contig1	p2	(TC)7	14	301	315	GTTGTGGCTCCTCTCTCTAGT	55.28	21	GCCTTCTCTTTCTTATTGCAG	56.08	21	151	--	--	Cellular Component: extracellular region (GO:0005576);; Cellular Component: plasma membrane (GO:0005886);; Biological Process: autophagy (GO:0006914);; Cellular Component: plasmodesma (GO:0009506);; Biological Process: defense response to bacterium (GO:0042742);;	--	Cysteine-rich repeat secretory protein 12 OS=Arabidopsis thaliana GN=CRRSP12 PE=2 SV=2	DUF26 domain-containing protein 1 precursor, putative [Ricinus communis]
CL9689Contig1	p3	(GAT)5	15	301	316	GATGAAGATGGAGAGGCTATT	55.06	21	CTCCTTGCAATCTTTGAACT	54.66	20	155	--	--	--	--	Protein SPT2 homolog OS=Drosophila melanogaster GN=CG5815 PE=1 SV=1	PREDICTED: uncharacterized protein LOC100241361 [Vitis vinifera]
CL9929Contig1	p2	(TC)7	14	65	79	AAAGTATTGGAGCAGAGATGC	56.21	21	CGATATCGACATGATGCTACT	55.38	21	185	--	--	--	--	U-box domain-containing protein 35 OS=Arabidopsis thaliana GN=PUB35 PE=1 SV=2	PREDICTED: uncharacterized protein LOC101213489 [Cucumis sativus]
CL9957Contig1	p3	(TCT)5	15	301	316	TACTGTTGGAGCAGTTTTAGG	54.84	21	GCAGATGCTCTATCAGAAGAA	54.92	21	149	--	--	Cellular Component: plastid (GO:0009536);; Biological Process: chromoplast organization (GO:0009661);; Biological Process: carotene biosynthetic process (GO:0016120);;	--	--	PREDICTED: uncharacterized protein LOC101219412 [Cucumis sativus]
CL10063Contig1	p2	(TC)6	12	143	155	ATCTTCAGCTTCGTCTTCTTC	55.49	21	GTGAGGGTAAAAAGATTGAGTC	54.66	22	175	--	--	Cellular Component: nucleus (GO:0005634);; Cellular Component: endosome (GO:0005768);; Cellular Component: vacuolar membrane (GO:0005774);; Cellular Component: Golgi apparatus (GO:0005794);; Cellular Component: trans-Golgi network (GO:0005802);; Molecular Function: methyltransferase activity (GO:0008168);; Molecular Function: S-adenosylmethionine-dependent methyltransferase activity (GO:0008757);…	--	Probable methyltransferase PMT16 OS=Arabidopsis thaliana GN=At2g45750 PE=3 SV=1	PREDICTED: probable methyltransferase PMT15-like [Cucumis sativus]
CL10098Contig1	p3	(GGC)6	18	301	319	GAACCCGTCAATGTATCTTCT	55.74	21	CTCTTACGGTTCTTCCAGAAT	55.23	21	156	[E]	Amino acid transport and metabolism	Molecular Function: L-threonine ammonia-lyase activity (GO:0004794);; Biological Process: gluconeogenesis (GO:0006094);; Biological Process: threonine metabolic process (GO:0006566);; Biological Process: cytoskeleton organization (GO:0007010);; Biological Process: isoleucine biosynthetic process (GO:0009097);; Cellular Component: chloroplast (GO:0009507);; Biological Process: proteasomal protein …	K01754|0.0|rcu:RCOM_0839990|threonine dehydratase/deaminase, putative (EC:4.3.1.19)	Threonine dehydratase biosynthetic, chloroplastic OS=Arabidopsis thaliana GN=OMR1 PE=1 SV=1	PREDICTED: threonine dehydratase biosynthetic, chloroplastic-like [Cucumis sativus]
CL10112Contig1	p2	(AG)6	12	301	313	GAATGATCAGAGCTTTTTGG	55	20	GTTCTAAGAGCAAACCTGGAT	55.22	21	147	--	--	Molecular Function: nucleic acid binding (GO:0003676);; Molecular Function: zinc ion binding (GO:0008270);;	--	--	PREDICTED: uncharacterized protein LOC101204073 [Cucumis sativus]
CL10145Contig1	p2	(AT)9	18	240	258	GGCTTTGCTCTCTCTAAAAA	54.26	20	ACTGACTTCTCATTCAGACCA	54.8	21	153	[I]	Lipid transport and metabolism	Biological Process: very long-chain fatty acid metabolic process (GO:0000038);; Molecular Function: nucleotide binding (GO:0000166);; Molecular Function: catalytic activity (GO:0003824);; Molecular Function: iron ion binding (GO:0005506);; Cellular Component: plasma membrane (GO:0005886);; Biological Process: fatty acid biosynthetic process (GO:0006633);; Biological Process: cuticle hydrocarbon b…	--	Protein ECERIFERUM 3 OS=Arabidopsis thaliana GN=CER3 PE=1 SV=1	PREDICTED: protein ECERIFERUM 3-like [Cucumis sativus]
CL10145Contig1	p2	(AG)6	12	301	313	CTGCAAAGTTTCTGTAGGAGA	54.94	21	AGGATTTCATGTCCATGTTC	54.76	20	141	[I]	Lipid transport and metabolism	Biological Process: very long-chain fatty acid metabolic process (GO:0000038);; Molecular Function: nucleotide binding (GO:0000166);; Molecular Function: catalytic activity (GO:0003824);; Molecular Function: iron ion binding (GO:0005506);; Cellular Component: plasma membrane (GO:0005886);; Biological Process: fatty acid biosynthetic process (GO:0006633);; Biological Process: cuticle hydrocarbon b…	--	Protein ECERIFERUM 3 OS=Arabidopsis thaliana GN=CER3 PE=1 SV=1	PREDICTED: protein ECERIFERUM 3-like [Cucumis sativus]
CL10167Contig1	p2	(AC)6	12	147	159	CGTAACTTGTTTGTGATGAGG	55.85	21	GAATTCGTTAAGTGGGTCAGT	55.82	21	134	--	--	Cellular Component: endosome (GO:0005768);; Cellular Component: vacuolar membrane (GO:0005774);; Cellular Component: Golgi apparatus (GO:0005794);; Cellular Component: trans-Golgi network (GO:0005802);; Biological Process: transport (GO:0006810);; Cellular Component: plant-type cell wall (GO:0009505);; Cellular Component: plasmodesma (GO:0009506);; Cellular Component: membrane (GO:0016020);; Cell…	--	Putative phagocytic receptor 1b OS=Dictyostelium discoideum GN=phg1b PE=2 SV=1	PREDICTED: putative phagocytic receptor 1b-like [Cucumis sativus]
CL10218Contig1	p3	(TTC)5	15	169	184	CCATTCATCTCAGTCATCATC	55.39	21	CTCGAATTCTACAGCTACTCG	54.66	21	144	--	--	Molecular Function: protein kinase activity (GO:0004672);; Cellular Component: mitochondrion (GO:0005739);;	--	Pentatricopeptide repeat-containing protein At5g25630 OS=Arabidopsis thaliana GN=At5g25630 PE=2 SV=2	hypothetical protein PRUPE_ppa002759mg [Prunus persica]
CL10294Contig1	p3	(CAA)6	18	203	221	CCAACAGTCATCAGACCAAT	55.86	20	CTGCTGTTGTTGATGTTGAT	54.55	20	160	--	--	Molecular Function: DNA binding (GO:0003677);; Molecular Function: transcription cofactor activity (GO:0003712);; Cellular Component: nucleus (GO:0005634);; Biological Process: embryo development (GO:0009790);; Biological Process: regulation of flower development (GO:0009909);; Biological Process: hydrogen peroxide catabolic process (GO:0042744);; Molecular Function: protein heterodimerization ac…	--	Transcriptional corepressor SEUSS OS=Arabidopsis thaliana GN=SEU PE=1 SV=1	PREDICTED: LOW QUALITY PROTEIN: transcriptional corepressor SEUSS-like [Cucumis sativus]
CL10304Contig1	p3	(GAA)6	18	301	319	GCTTCTTCCACTGAATACCTT	55.22	21	ACTTCAGAAATCCGGCTAA	55.03	19	192	[KLB]	--	Biological Process: RNA splicing, via endonucleolytic cleavage and ligation (GO:0000394);; Molecular Function: DNA binding (GO:0003677);; Molecular Function: sequence-specific DNA binding transcription factor activity (GO:0003700);; Cellular Component: nuclear euchromatin (GO:0005719);; Biological Process: DNA replication (GO:0006260);; Biological Process: DNA repair (GO:0006281);; Biological Pro…	K09272|0.0|vvi:100249277|hypothetical protein LOC100249277	FACT complex subunit SSRP1 OS=Vicia faba GN=SSRP1 PE=2 SV=1	PREDICTED: FACT complex subunit SSRP1-like [Cucumis sativus]
CL10320Contig1	p3	(CTA)6	18	301	319	ACCTCATCAAAACTCTTAGCC	55.22	21	TCTCATACTAAGATGCCTGCT	54.4	21	158	[RTKL]	--	Molecular Function: nucleotide binding (GO:0000166);; Biological Process: activation of MAPK activity (GO:0000187);; Biological Process: cell plate assembly (GO:0000919);; Molecular Function: protein kinase activity (GO:0004672);; Molecular Function: protein serine/threonine kinase activity (GO:0004674);; Cellular Component: nucleus (GO:0005634);; Biological Process: DNA replication initiation (G…	--	Mitogen-activated protein kinase kinase kinase YODA OS=Arabidopsis thaliana GN=YDA PE=1 SV=1	PREDICTED: serine/threonine-protein kinase KIC1-like [Cucumis sativus]
CL10363Contig1	p2	(CT)6	12	166	178	CTCAGCTAGCTCTTTCGTTTT	55.91	21	CGATAGGTGAAGTTATCCACA	55.28	21	159	--	--	Biological Process: reproduction (GO:0000003);; Molecular Function: protein binding (GO:0005515);; Cellular Component: nucleus (GO:0005634);; Cellular Component: cytosol (GO:0005829);; Biological Process: DNA metabolic process (GO:0006259);; Biological Process: lipid transport (GO:0006869);; Biological Process: cell cycle (GO:0007049);; Biological Process: response to hormone stimulus (GO:0009725…	--	Acyl-CoA-binding domain-containing protein 4 OS=Arabidopsis thaliana GN=ACBP4 PE=1 SV=1	PREDICTED: acyl-CoA-binding domain-containing protein 4-like [Cucumis sativus]
CL10461Contig1	p2	(TC)6	12	301	313	GGTTCTGGAACTAAGCAAGAT	55.22	21	TGCTTCGTCACTTTCCTTAT	55.12	20	134	--	--	Cellular Component: cytoplasm (GO:0005737);; Cellular Component: cytosol (GO:0005829);; Cellular Component: plasma membrane (GO:0005886);; Biological Process: organelle organization (GO:0006996);; Cellular Component: chloroplast (GO:0009507);; Biological Process: mRNA modification (GO:0016556);; Biological Process: cellular protein metabolic process (GO:0044267);; Biological Process: organ develo…	--	Clustered mitochondria protein OS=Arabidopsis thaliana GN=FMT PE=2 SV=1	PREDICTED: LOW QUALITY PROTEIN: uncharacterized protein LOC101229361 [Cucumis sativus]
CL10478Contig1	p2	(AT)6	12	301	313	GACAACAAGAAGGATCAAGTC	53.84	21	GCTAATTACAATAGGAGGTTGG	54.86	22	152	--	--	Molecular Function: DNA binding (GO:0003677);; Molecular Function: sequence-specific DNA binding transcription factor activity (GO:0003700);; Molecular Function: protein binding (GO:0005515);; Cellular Component: nucleus (GO:0005634);; Biological Process: regulation of transcription, DNA-dependent (GO:0006355);; Biological Process: response to auxin stimulus (GO:0009733);; Biological Process: aux…	--	Auxin response factor 9 OS=Arabidopsis thaliana GN=ARF9 PE=1 SV=1	PREDICTED: auxin response factor 9-like [Cucumis sativus]
CL10484Contig1	p3	(ATT)6	18	301	319	GCGATAAGGACTAATTTTGC	54.36	20	GACAAGAAAAGAGAGGTTTCG	55.83	21	152	[M]	Cell wall/membrane/envelope biogenesis	Biological Process: cell morphogenesis (GO:0000902);; Cellular Component: endosome (GO:0005768);; Cellular Component: Golgi apparatus (GO:0005794);; Cellular Component: trans-Golgi network (GO:0005802);; Cellular Component: plasma membrane (GO:0005886);; Biological Process: glycolysis (GO:0006096);; Biological Process: calcium ion transport (GO:0006816);; Biological Process: water transport (GO:0…	K10999|0.0|vvi:100241197|hypothetical protein LOC100241197	Cellulose synthase A catalytic subunit 4 [UDP-forming] OS=Arabidopsis thaliana GN=CESA4 PE=1 SV=1	PREDICTED: cellulose synthase A catalytic subunit 4 [UDP-forming]-like [Cucumis sativus]
CL10551Contig1	p2	(AG)6	12	33	45	GGTGGAGAGAGACAGACAGA	55.21	20	GGAAATCTAGAAGAGGGAAAG	54.01	21	127	[P]	Inorganic ion transport and metabolism	Molecular Function: magnesium ion binding (GO:0000287);; Biological Process: involuntary skeletal muscle contraction (GO:0003011);; Molecular Function: phospholipid-translocating ATPase activity (GO:0004012);; Molecular Function: calmodulin binding (GO:0005516);; Molecular Function: ATP binding (GO:0005524);; Molecular Function: phospholipid transporter activity (GO:0005548);; Cellular Component:…	K01530|0.0|rcu:RCOM_0654980|Phospholipid-transporting ATPase, putative (EC:3.6.3.1)	Putative phospholipid-transporting ATPase 7 OS=Arabidopsis thaliana GN=ALA7 PE=2 SV=3	phospholipid-transporting ATPase [Cucumis melo subsp. melo]
CL10562Contig1	p3	(TCT)6	18	132	150	CCAAACCCTGCTAGATAATTC	55.59	21	CCCTAGAGAAAGATTTCAACC	54.74	21	145	--	--	Molecular Function: protein binding (GO:0005515);;	--	UHRF1-binding protein 1-like OS=Mus musculus GN=Uhrf1bp1l PE=2 SV=2	PREDICTED: uncharacterized protein LOC101210396 [Cucumis sativus]
CL10568Contig1	p2	(TC)6	12	301	313	CACGACTAAATCTTCCGTACA	55.52	21	GTTTCGAAGCGGTGTAGTAG	55.24	20	148	[DZ]	--	Molecular Function: chromatin binding (GO:0003682);; Molecular Function: protein binding (GO:0005515);; Cellular Component: nucleus (GO:0005634);; Cellular Component: microtubule organizing center (GO:0005815);; Cellular Component: cilium (GO:0005929);; Biological Process: cellular protein modification process (GO:0006464);; Biological Process: organelle organization (GO:0006996);; Biological Pro…	--	Ultraviolet-B receptor UVR8 OS=Arabidopsis thaliana GN=UVR8 PE=1 SV=1	PREDICTED: uncharacterized protein LOC101222741 [Cucumis sativus]
CL10576Contig1	p4	(ATAC)5	20	98	118	GCATAGATTAGAGCCTTCTAGC	54.57	22	CTTGGATGGTTTCTAGTTGTG	54.9	21	187	[I]	Lipid transport and metabolism	Biological Process: tissue homeostasis (GO:0001894);; Molecular Function: acetyl-CoA carboxylase activity (GO:0003989);; Molecular Function: biotin carboxylase activity (GO:0004075);; Molecular Function: ATP binding (GO:0005524);; Cellular Component: mitochondrion (GO:0005739);; Cellular Component: cytosol (GO:0005829);; Cellular Component: plasma membrane (GO:0005886);; Biological Process: acety…	K11262|0.0|vvi:100247288|hypothetical protein LOC100247288	Acetyl-CoA carboxylase 1 OS=Arabidopsis thaliana GN=ACC1 PE=1 SV=1	PREDICTED: acetyl-CoA carboxylase 1-like [Cucumis sativus]
CL10629Contig1	p2	(TA)8	16	301	317	GTTACCAAAGCAACATGTCC	55.57	20	CTGAACCCTTGTTCATTTAC	52.26	20	148	[RTKL]	--	Molecular Function: nucleotide binding (GO:0000166);; Biological Process: kidney development (GO:0001822);; Biological Process: regulation of protein phosphorylation (GO:0001932);; Biological Process: immune system process (GO:0002376);; Molecular Function: cyclic nucleotide-dependent protein kinase activity (GO:0004690);; Molecular Function: cGMP-dependent protein kinase activity (GO:0004692);; …	--	Protein phosphatase 2C and cyclic nucleotide-binding/kinase domain-containing protein OS=Arabidopsis thaliana GN=At2g20050 PE=1 SV=2	PREDICTED: LOW QUALITY PROTEIN: protein phosphatase 2C and cyclic nucleotide-binding/kinase domain-containing protein-like [Cucumis sativus]
CL10640Contig1	p2	(TC)6	12	301	313	AGACAATCTCAACCTCACAGA	54.8	21	ACACAGATCTCGTATCCACAT	54.45	21	161	[K]	Transcription	Biological Process: nuclear-transcribed mRNA catabolic process, deadenylation-dependent decay (GO:0000288);; Molecular Function: ubiquitin-protein ligase activity (GO:0004842);; Molecular Function: protein binding (GO:0005515);; Cellular Component: plasmodesma (GO:0009506);; Biological Process: gene expression (GO:0010467);; Cellular Component: CCR4-NOT complex (GO:0030014);; Biological Process: …	K10643|0.0|vvi:100267264|hypothetical protein LOC100267264	CCR4-NOT transcription complex subunit 4 OS=Mus musculus GN=Cnot4 PE=1 SV=2	PREDICTED: uncharacterized protein LOC101221790 [Cucumis sativus]
CL10654Contig1	p3	(AGA)5	15	301	316	CACTCCCAAGATTATTCAGTG	54.82	21	TCTTCTTAAAGGCCTATGCTC	55.62	21	144	--	--	Biological Process: RNA splicing, via endonucleolytic cleavage and ligation (GO:0000394);; Molecular Function: protein binding (GO:0005515);; Cellular Component: nucleus (GO:0005634);; Biological Process: cell-cell signaling (GO:0007267);; Biological Process: serine family amino acid metabolic process (GO:0009069);; Biological Process: methionine biosynthetic process (GO:0009086);; Biological Pro…	--	ETO1-like protein 1 OS=Arabidopsis thaliana GN=EOL1 PE=1 SV=1	PREDICTED: ETO1-like protein 1-like [Cucumis sativus]
CL10702Contig1	p3	(TGA)6	18	301	319	AGATTCTTTGTCGCTAGCTCT	55.29	21	TCCAATGAAGGCTTGTCTAC	55.37	20	147	--	--	--	--	Serine-rich adhesin for platelets OS=Staphylococcus aureus (strain MSSA476) GN=sraP PE=3 SV=1	PREDICTED: uncharacterized protein LOC101206463 [Cucumis sativus]
CL10710Contig1	p3	(CAA)6	18	301	319	CCTCGTATGTCACAGGTTTTA	55.36	21	TCATCTGATAAGGAACCACTG	55.23	21	161	[RTKL]	--	Molecular Function: protein serine/threonine kinase activity (GO:0004674);; Molecular Function: protein tyrosine kinase activity (GO:0004713);; Molecular Function: ATP binding (GO:0005524);; Cellular Component: plasma membrane (GO:0005886);; Biological Process: microsporogenesis (GO:0009556);; Biological Process: abscisic acid mediated signaling pathway (GO:0009738);; Biological Process: brassino…	--	Inactive protein kinase SELMODRAFT_444075 OS=Selaginella moellendorffii GN=SELMODRAFT_444075 PE=2 SV=1	PREDICTED: tyrosine-protein kinase Lck-like [Cucumis sativus]
CL10720Contig1	p2	(CT)6	12	62	74	TTTTCCTCTCTCTCCTCTTTC	54.55	21	CTTCCTTGACTTTTGCAGAG	55.33	20	138	--	--	Molecular Function: binding (GO:0005488);; Biological Process: nervous system development (GO:0007399);; Biological Process: sensory organ development (GO:0007423);; Molecular Function: ligase activity (GO:0016874);; Biological Process: cell differentiation (GO:0030154);; Cellular Component: cell part (GO:0044464);;	--	Protein neuralized OS=Drosophila melanogaster GN=neur PE=1 SV=2	PREDICTED: uncharacterized protein LOC101214410 [Cucumis sativus]
CL10772Contig1	p2	(TA)6	12	301	313	ACAAACACATGTGAAGAGGTC	55.02	21	GCTTATCACTTCAACCATCCT	55.9	21	120	[S]	Function unknown	Molecular Function: catalytic activity (GO:0003824);; Cellular Component: extracellular region (GO:0005576);; Cellular Component: vacuole (GO:0005773);; Biological Process: metabolic process (GO:0008152);; Cellular Component: plant-type cell wall (GO:0009505);;	K09955|0.0|vvi:100246702|hypothetical protein LOC100246702	--	PREDICTED: uncharacterized protein LOC101207833 [Cucumis sativus]
CL10806Contig1	p3	(GAA)6	18	301	319	CTGAGCAGAAACTAAAACCAG	54.55	21	GTTTTCAACTTTGGATCACC	54.57	20	145	[C]	Energy production and conversion	Biological Process: polysaccharide catabolic process (GO:0000272);; Biological Process: starch metabolic process (GO:0005982);; Biological Process: glycerol metabolic process (GO:0006071);; Biological Process: cell adhesion (GO:0007155);; Molecular Function: glycerophosphodiester phosphodiesterase activity (GO:0008889);; Cellular Component: plasmodesma (GO:0009506);; Biological Process: plant-typ…	--	Probable glycerophosphoryl diester phosphodiesterase 1 OS=Arabidopsis thaliana GN=GPDL1 PE=1 SV=1	PREDICTED: probable glycerophosphoryl diester phosphodiesterase 1-like [Cucumis sativus]
CL10824Contig1	p3	(CCA)6	18	301	319	TTGAATATTCCTCTACCACTCC	55.02	22	CATATGTCTCCGAAATGGTT	55	20	154	[O]	Posttranslational modification, protein turnover, chaperones	Molecular Function: ATP-dependent peptidase activity (GO:0004176);; Molecular Function: metalloendopeptidase activity (GO:0004222);; Molecular Function: ATP binding (GO:0005524);; Cellular Component: mitochondrion (GO:0005739);; Cellular Component: mitochondrial inner membrane (GO:0005743);; Biological Process: ATP catabolic process (GO:0006200);; Biological Process: proteolysis (GO:0006508);; Bi…	K08956|0.0|vvi:100250187|hypothetical protein LOC100250187	ATP-dependent zinc metalloprotease FTSH 10, mitochondrial OS=Arabidopsis thaliana GN=FTSH10 PE=1 SV=1	PREDICTED: ATP-dependent zinc metalloprotease FTSH 10, mitochondrial-like [Cucumis sativus]
CL10878Contig1	p2	(AG)7	14	301	315	GGCAGACTAAAAAGAGAGGTC	54.94	21	TCTTAATCGTTCATCGTTCC	55.3	20	170	--	--	Biological Process: nuclear-transcribed mRNA catabolic process (GO:0000956);; Molecular Function: nucleic acid binding (GO:0003676);; Biological Process: RNA processing (GO:0006396);; Biological Process: response to salt stress (GO:0009651);; Cellular Component: nuclear part (GO:0044428);;	K12850|0.0|vvi:100267328|hypothetical protein LOC100267328	Pre-mRNA-splicing factor 38B OS=Homo sapiens GN=PRPF38B PE=1 SV=1	PREDICTED: uncharacterized protein LOC101215555 [Cucumis sativus]
CL10981Contig1	p2	(AT)9	18	134	152	AGCGTATACAACCCTAATTCC	55.08	21	CTCAGACAGAAGAAACACCAA	55.52	21	243	--	--	Biological Process: proteolysis (GO:0006508);; Biological Process: amino acid transport (GO:0006865);; Molecular Function: peptidase activity (GO:0008233);; Biological Process: response to organic substance (GO:0010033);; Molecular Function: hydrolase activity (GO:0016787);; Biological Process: protein metabolic process (GO:0019538);; Cellular Component: anchored to membrane (GO:0031225);; Biolog…	--	Aspartic proteinase-like protein 1 OS=Arabidopsis thaliana GN=At5g10080 PE=1 SV=1	PREDICTED: aspartic proteinase-like protein 1-like [Cucumis sativus]
CL11101Contig1	p2	(TA)6	12	39	51	GAGACTTGCATTGGAACG	55.05	18	AAAACAACCACTTACCAGCTC	56.05	21	129	[V]	Defense mechanisms	Biological Process: mitotic cell cycle (GO:0000278);; Biological Process: nuclear division (GO:0000280);; Biological Process: double-strand break repair via homologous recombination (GO:0000724);; Cellular Component: chromatin (GO:0000785);; Biological Process: cytokinesis by cell plate formation (GO:0000911);; Molecular Function: chromatin binding (GO:0003682);; Molecular Function: ubiquitin-pro…	--	E3 ubiquitin-protein ligase ORTHRUS 2 OS=Arabidopsis thaliana GN=ORTH2 PE=1 SV=1	PREDICTED: LOW QUALITY PROTEIN: E3 ubiquitin-protein ligase ORTHRUS 2-like [Cucumis sativus]
CL11160Contig1	p3	(CTT)5	15	67	82	TTCTCCTTTTTCTGTCGTGT	54.99	20	GTACTTGGCCACCATTATTC	54.59	20	153
CL11166Contig1	p2	(TC)6	12	301	313	ATTCTGGAGTCAAAGTTGGTC	55.79	21	GACGAGAATCATATCATGACG	55.6	21	152	[P]	Inorganic ion transport and metabolism	Molecular Function: manganese ion transmembrane transporter activity (GO:0005384);; Cellular Component: mitochondrion (GO:0005739);; Cellular Component: vacuolar membrane (GO:0005774);; Cellular Component: plasma membrane (GO:0005886);; Biological Process: potassium ion transport (GO:0006813);; Biological Process: calcium ion transport (GO:0006816);; Cellular Component: endomembrane system (GO:00…	--	Cation/calcium exchanger 4 OS=Arabidopsis thaliana GN=CCX4 PE=2 SV=1	PREDICTED: cation/calcium exchanger 4-like [Cucumis sativus]
CL11290Contig1	p3	(GTG)5	15	301	316	GTGGACCTGACGAGAGTTAC	54.64	20	CACCATCATATCCTCCTCTACT	54.88	22	156	[R]	General function prediction only	Biological Process: reproduction (GO:0000003);; Molecular Function: nucleotide binding (GO:0000166);; Biological Process: mRNA splicing, via spliceosome (GO:0000398);; Molecular Function: single-stranded DNA binding (GO:0003697);; Molecular Function: RNA binding (GO:0003723);; Cellular Component: spliceosomal complex (GO:0005681);; Cellular Component: cytoplasm (GO:0005737);; Cellular Component: …	K12741|0.0|vvi:100256017|hypothetical protein LOC100256017	Heterogeneous nuclear ribonucleoprotein 1 OS=Arabidopsis thaliana GN=RNP1 PE=1 SV=1	PREDICTED: LOW QUALITY PROTEIN: nuclear pore membrane glycoprotein 210-like [Cucumis sativus]
CL11320Contig1	p3	(CTT)6	18	301	319	ATCCGAAGACCTAATTTTCC	54.91	20	CCCATTTCTCTTTGTCTTCTC	55.59	21	160	--	--	Cellular Component: endosome (GO:0005768);; Cellular Component: Golgi apparatus (GO:0005794);; Cellular Component: trans-Golgi network (GO:0005802);; Cellular Component: plant-type cell wall (GO:0009505);; Molecular Function: transferase activity, transferring glycosyl groups (GO:0016757);; Cellular Component: intracellular membrane-bounded organelle (GO:0043231);;	--	Uncharacterized protein At1g04910 OS=Arabidopsis thaliana GN=At1g04910 PE=1 SV=1	PREDICTED: uncharacterized protein LOC101215039 [Cucumis sativus]
CL11410Contig1	p3	(GCT)5	15	301	316	CATATAGTGAGGCGATGGAG	55.8	20	AGGAGCAGAATCAACAACAC	55.26	20	149	[R]	General function prediction only	Molecular Function: tRNA binding (GO:0000049);; Molecular Function: nucleotide binding (GO:0000166);; Biological Process: mRNA splicing, via spliceosome (GO:0000398);; Molecular Function: nucleic acid binding (GO:0003676);; Cellular Component: nucleus (GO:0005634);; Cellular Component: cytosol (GO:0005829);; Molecular Function: poly(A) RNA binding (GO:0008143);; Biological Process: pyrimidine rib…	--	Polyadenylate-binding protein RBP47 OS=Nicotiana plumbaginifolia GN=RBP47 PE=1 SV=1	PREDICTED: polyadenylate-binding protein RBP47C-like [Cucumis sativus]
CL11515Contig1	p4	(AAAT)5	20	301	321	GGAAGAAGAAAATGAGTTGC	54.13	20	CTGTGGATTTCAGAACACAA	54.52	20	149	[KT]	--	Biological Process: response to stress (GO:0006950);; Cellular Component: plastid chromosome (GO:0009508);; Cellular Component: chloroplast thylakoid membrane (GO:0009535);; Cellular Component: chloroplast stroma (GO:0009570);; Cellular Component: chloroplast inner membrane (GO:0009706);; Biological Process: thylakoid membrane organization (GO:0010027);; Biological Process: vesicle organization (…	K03969|1e-159|pop:POPTR_735580|hypothetical protein	Membrane-associated 30 kDa protein, chloroplastic OS=Pisum sativum GN=IM30 PE=1 SV=1	PREDICTED: membrane-associated 30 kDa protein, chloroplastic-like [Cucumis sativus]
CL11522Contig1	p2	(GA)6	12	301	313	GAGAGTCAAAGCATCTGATTG	55.08	21	AGCATCTGTACATCTTCCTTG	54.54	21	157	--	--	Biological Process: lipid metabolic process (GO:0006629);; Biological Process: cellular process (GO:0009987);; Cellular Component: membrane (GO:0016020);; Cellular Component: intracellular membrane-bounded organelle (GO:0043231);; Cellular Component: cytoplasmic part (GO:0044444);;	--	Probable ADP-ribosylation factor GTPase-activating protein AGD14 OS=Arabidopsis thaliana GN=AGD14 PE=1 SV=2	PREDICTED: uncharacterized LOC101209764 [Cucumis sativus]
CL11522Contig1	p2	(TC)7	14	301	315	TCTCTTTCTCTACCCTTCGAC	55.34	21	AGCAATCTCCACTTTCTCTCT	54.92	21	151	[RTKL]	--	Biological Process: RNA splicing, via endonucleolytic cleavage and ligation (GO:0000394);; Biological Process: regulation of response to biotic stimulus (GO:0002831);; Molecular Function: protein serine/threonine kinase activity (GO:0004674);; Molecular Function: protein serine/threonine/tyrosine kinase activity (GO:0004712);; Molecular Function: non-membrane spanning protein tyrosine kinase acti…	--	Serine/threonine-protein kinase HT1 OS=Arabidopsis thaliana GN=HT1 PE=1 SV=1	PREDICTED: serine/threonine-protein kinase HT1-like [Cucumis sativus]
CL11593Contig1	p3	(TTC)5	15	301	316	CTGTGAAAATCAGAGAGATGG	54.92	21	CAGAATTTGTGGAAACGAAG	55.89	20	145
CL11831Contig1	p3	(CTG)5	15	301	316	TCTTCTTGTGGTTTGTAGCTG	55.72	21	CTCAGATTTTGGAAGCTCAC	55.07	20	158	--	--	Molecular Function: DNA binding (GO:0003677);; Molecular Function: sequence-specific DNA binding transcription factor activity (GO:0003700);; Cellular Component: nucleus (GO:0005634);; Biological Process: transcription, DNA-dependent (GO:0006351);; Biological Process: response to xenobiotic stimulus (GO:0009410);; Biological Process: response to ethylene stimulus (GO:0009723);; Biological Process…	--	Light-inducible protein CPRF2 OS=Petroselinum crispum GN=CPRF2 PE=2 SV=2	PREDICTED: light-inducible protein CPRF2-like [Cucumis sativus]
CL11839Contig1	p3	(GAG)6	18	301	319	GAGGGAACATAGAGATGTCATT	54.83	22	CACTCTCTTTTCCTCTTCACA	54.71	21	147	--	--		--	--	PREDICTED: uncharacterized LOC101208571 [Cucumis sativus]
CL11858Contig1	p3	(TCT)5	15	301	316	CTAAAACCTCCACACAATCAC	54.72	21	TAGAGTGGGAAAATGCAAGT	54.96	20	124	--	--	Biological Process: activation of blood coagulation via clotting cascade (GO:0002543);; Molecular Function: calcium activated cation channel activity (GO:0005227);; Molecular Function: intracellular calcium activated chloride channel activity (GO:0005229);; Molecular Function: voltage-gated ion channel activity (GO:0005244);; Cellular Component: endoplasmic reticulum (GO:0005783);; Cellular Compo…	--	Anoctamin-like protein At1g73020 OS=Arabidopsis thaliana GN=At1g73020 PE=2 SV=1	PREDICTED: anoctamin-like protein Os01g0706700-like [Fragaria vesca subsp. vesca]
CL11941Contig1	p3	(TCT)5	15	143	158	TCAGGAAGTGGAAGAAGAAA	55.05	20	CTTTACTGGGAAGACCAAATC	55.47	21	159	[E]	Amino acid transport and metabolism	Biological Process: maltose metabolic process (GO:0000023);; Biological Process: histidine biosynthetic process (GO:0000105);; Molecular Function: magnesium ion binding (GO:0000287);; Molecular Function: ATP phosphoribosyltransferase activity (GO:0003879);; Biological Process: threonine catabolic process (GO:0006567);; Cellular Component: chloroplast stroma (GO:0009570);; Biological Process: star…	K00765|0.0|vvi:100256118|hypothetical protein LOC100256118	ATP phosphoribosyltransferase 2, chloroplastic OS=Arabidopsis thaliana GN=HISN1B PE=1 SV=1	PREDICTED: ATP phosphoribosyltransferase-like [Cucumis sativus]
CL12247Contig1	p3	(AGA)6	18	301	319	GATATGGATGAAAAGGAGGAG	55.32	21	GAGGAAGATTTGCAGATTAGC	55.85	21	166	--	--	Molecular Function: DNA binding (GO:0003677);; Molecular Function: sequence-specific DNA binding transcription factor activity (GO:0003700);; Molecular Function: protein binding (GO:0005515);; Cellular Component: nucleus (GO:0005634);; Cellular Component: cytoplasm (GO:0005737);; Biological Process: regulation of cell shape (GO:0008360);; Biological Process: response to abiotic stimulus (GO:00096…	--	MADS-box protein FBP24 OS=Petunia hybrida GN=FBP24 PE=1 SV=1	PREDICTED: MADS-box protein FBP24-like [Cucumis sativus]
CL12297Contig1	p2	(CT)7	14	301	315	GGTACTTTTACCGAGCAATCT	55.26	21	GCTTTTGATACACATGAGACG	55.92	21	161	--	--	Biological Process: cysteine biosynthetic process (GO:0019344);;	--	--	PREDICTED: uncharacterized protein LOC101217856 [Cucumis sativus]
CL12297Contig1	p2	(AG)7	14	301	315	AATGAACCCTGGTCCTACTT	55.16	20	TTCCTTGCTAAAGGACAGTG	55.63	20	149	--	--	Biological Process: cysteine biosynthetic process (GO:0019344);;	--	--	PREDICTED: uncharacterized protein LOC101217856 [Cucumis sativus]
CL12525Contig1	p2	(AT)6	12	272	284	CAGATCAGCAGTATCAGCTTT	54.88	21	CAGGTTCATGATGCCTATTC	55.59	20	216	[GEPR]	--	Molecular Function: sugar:hydrogen symporter activity (GO:0005351);; Molecular Function: glucose transmembrane transporter activity (GO:0005355);; Molecular Function: protein binding (GO:0005515);; Cellular Component: plasma membrane (GO:0005886);; Biological Process: vitamin metabolic process (GO:0006766);; Cellular Component: plastid (GO:0009536);; Molecular Function: galactose:hydrogen symport…	--	Probable plastidic glucose transporter 1 OS=Arabidopsis thaliana GN=At1g05030 PE=2 SV=2	hypothetical protein PRUPE_ppa003996mg [Prunus persica]
CL12931Contig1	p3	(CAT)6	18	301	319	AACCACCATCTTCAAGGTTAC	55.66	21	AGAGCGAGTCTAGGGTGTAAT	54.85	21	150	--	--	Cellular Component: extracellular region (GO:0005576);; Cellular Component: endoplasmic reticulum (GO:0005783);; Biological Process: defense response (GO:0006952);; Biological Process: response to water deprivation (GO:0009414);; Biological Process: salicylic acid metabolic process (GO:0009696);; Biological Process: response to abscisic acid stimulus (GO:0009737);; Cellular Component: membrane (G…	--	Protein ASPARTIC PROTEASE IN GUARD CELL 1 OS=Arabidopsis thaliana GN=ASPG1 PE=1 SV=1	PREDICTED: protein ASPARTIC PROTEASE IN GUARD CELL 1-like [Cucumis sativus]
CL13328Contig1	p3	(AGA)6	18	115	133	TGAGTTCTGAAAGATCACTCG	55.61	21	ACTATTTTGGGAGCTGTCTTC	55.22	21	151	--	--	--	--	--	PREDICTED: uncharacterized protein LOC101217042 [Cucumis sativus]
CL13649Contig1	p3	(AAG)5	15	59	74	GAAAAGGTACGGAATGAAGAG	55.63	21	CTGGTTAAAGGTGTGGAGATT	55.83	21	158	--	--	Cellular Component: endoplasmic reticulum (GO:0005783);; Cellular Component: plasma membrane (GO:0005886);; Biological Process: GPI anchor biosynthetic process (GO:0006506);; Biological Process: single fertilization (GO:0007338);; Cellular Component: integral to endoplasmic reticulum membrane (GO:0030176);; Biological Process: pollen sperm cell differentiation (GO:0048235);;	--	Protein HAPLESS 2 OS=Arabidopsis thaliana GN=HAP2 PE=2 SV=1	PREDICTED: protein HAPLESS 2-like [Cucumis sativus]
CL13706Contig1	p3	(TGC)5	15	301	316	GTTTCGACCAGTCATTTGAT	55.02	20	CGAATCCACTGTTTGTAGTTC	54.89	21	154	--	--	Molecular Function: protein binding (GO:0005515);; Cellular Component: nucleus (GO:0005634);; Biological Process: response to salt stress (GO:0009651);; Biological Process: abscisic acid mediated signaling pathway (GO:0009738);; Biological Process: jasmonic acid mediated signaling pathway (GO:0009867);; Biological Process: cellular macromolecule metabolic process (GO:0044260);; Biological Process…	--	Ninja-family protein AFP3 OS=Arabidopsis thaliana GN=AFP3 PE=1 SV=1	hypothetical protein PRUPE_ppa022619mg [Prunus persica]
CL13816Contig1	p3	(GAG)6	18	301	319	GGTCGAAGAAATATCAGGTCT	54.98	21	CCCATTTCTTCTTCTCCTTT	55.11	20	150	[U]	Intracellular trafficking, secretion, and vesicular transport	Cellular Component: nucleus (GO:0005634);; Cellular Component: endosome (GO:0005768);; Cellular Component: endoplasmic reticulum (GO:0005783);; Cellular Component: Golgi apparatus (GO:0005794);; Cellular Component: cis-Golgi network (GO:0005801);; Cellular Component: trans-Golgi network (GO:0005802);; Cellular Component: cytosol (GO:0005829);; Cellular Component: plasma membrane (GO:0005886);; Ce…	--	Protein YIPF6 homolog OS=Dictyostelium discoideum GN=yipf6 PE=3 SV=2	PREDICTED: protein YIPF6-like [Cucumis sativus]
CL13893Contig1	p3	(TCT)5	15	41	56	CAAACTTTCCCTCTTCCTTT	55.18	20	AGAGCTTGAGTCCAACAATG	55.45	20	126	--	--	--	--	--	Uncharacterized protein TCM_032752 [Theobroma cacao]
CL13956Contig1	p2	(TC)6	12	103	115	CCTAAACCCCTCATTTTCAT	55.66	20	GGTTAGGGTTTGAAGAGAAGA	55.2	21	170	--	--	Cellular Component: chromatin (GO:0000785);; Biological Process: myeloid dendritic cell activation (GO:0001773);; Biological Process: dendritic cell chemotaxis (GO:0002407);; Molecular Function: DNA binding (GO:0003677);; Molecular Function: chromatin binding (GO:0003682);; Molecular Function: damaged DNA binding (GO:0003684);; Molecular Function: double-stranded DNA binding (GO:0003690);; Molecu…	--	HMG1/2-like protein OS=Glycine max PE=2 SV=1	PREDICTED: HMG1/2-like protein-like [Cucumis sativus]
CL13976Contig1	p3	(CAG)5	15	273	288	TTACAACTTTGTACGGACCAG	55.43	21	CAGGTTGAGAAATGTGAACAG	55.82	21	149	[LR]	--	Cellular Component: chloroplast (GO:0009507);; Molecular Function: hydrolase activity (GO:0016787);;	--	Nudix hydrolase 20, chloroplastic OS=Arabidopsis thaliana GN=NUDT20 PE=2 SV=1	PREDICTED: nudix hydrolase 20, chloroplastic-like [Cucumis sativus]
CL14021Contig1	p3	(CTT)5	15	59	74	CACAATCACAGGCACTTCTAT	55.34	21	GAGGTGTAGATCTGATCCTGTT	54.89	22	154	--	--	Cellular Component: chloroplast (GO:0009507);; Biological Process: photosystem II assembly (GO:0010207);;	--	Uncharacterized protein DDB_G0271670 OS=Dictyostelium discoideum GN=DDB_G0271670 PE=4 SV=1	PREDICTED: uncharacterized protein LOC101220770 [Cucumis sativus]
CL14046Contig1	p3	(ATG)5	15	301	316	GAACAATTACACCACCCTCTT	55.66	21	CAAGCTTCTTCTTCCTCTTCT	54.83	21	154	--	--	Cellular Component: nuclear chromatin (GO:0000790);; Molecular Function: sequence-specific DNA binding transcription factor activity (GO:0003700);; Biological Process: regulation of transcription from RNA polymerase II promoter (GO:0006357);; Biological Process: cellular response to starvation (GO:0009267);; Biological Process: pathogenesis (GO:0009405);; Biological Process: response to light sti…	--	GATA transcription factor 21 OS=Arabidopsis thaliana GN=GATA21 PE=1 SV=2	PREDICTED: putative GATA transcription factor 22-like [Cucumis sativus]
CL14279Contig1	p3	(ATC)6	18	301	319	ACACCTTCTCCAATTCAGTTC	55.79	21	AGTGATCAGAGTGAGGGTTTT	55.37	21	172	--	--	Molecular Function: fatty-acyl-CoA binding (GO:0000062);; Molecular Function: protein binding (GO:0005515);; Cellular Component: endoplasmic reticulum (GO:0005783);; Cellular Component: plasma membrane (GO:0005886);; Biological Process: lipid transport (GO:0006869);; Biological Process: ER to Golgi vesicle-mediated transport (GO:0006888);; Biological Process: intra-Golgi vesicle-mediated transpor…	--	Acyl-CoA-binding domain-containing protein 3 OS=Arabidopsis thaliana GN=ACBP3 PE=1 SV=1	PREDICTED: acyl-CoA-binding domain-containing protein 3-like [Cucumis sativus]
CL14402Contig1	p2	(CT)7	14	301	315	AAGGTTGTAAGCATTCCTCA	54.96	20	AACAAACATGAACCAGATCC	54.85	20	161	--	--	Cellular Component: chloroplast (GO:0009507);;	--	--	PREDICTED: uncharacterized protein LOC101206493 [Cucumis sativus]
CL14552Contig1	p2	(AG)11	22	301	323	TTACTCAAAGCCTTACGAGAG	54.25	21	GAGGAGTTCCTTTTCATCAGT	55.01	21	190	[O]	Posttranslational modification, protein turnover, chaperones	Molecular Function: ubiquitin-protein ligase activity (GO:0004842);; Molecular Function: cysteine-type endopeptidase inhibitor activity (GO:0004869);; Cellular Component: extracellular region (GO:0005576);; Cellular Component: nucleus (GO:0005634);; Biological Process: postreplication repair (GO:0006301);; Biological Process: ubiquitin-dependent protein catabolic process (GO:0006511);; Biological…	K10688|1e-110|vvi:100260813|hypothetical protein LOC100260813	Probable ubiquitin-conjugating enzyme E2 16 OS=Arabidopsis thaliana GN=UBC16 PE=2 SV=1	PREDICTED: cysteine proteinase inhibitor 12-like [Cucumis sativus]
CL14559Contig1	p3	(GCG)5	15	301	316	GTTTTGATGGAGCTGTTGTT	55.28	20	CTTTTTCAAACCCAACTCAC	54.84	20	146	--	--	Cellular Component: plasma membrane (GO:0005886);;	--	Uncharacterized protein At1g08160 OS=Arabidopsis thaliana GN=At1g08160 PE=2 SV=1	PREDICTED: uncharacterized protein LOC101215036 [Cucumis sativus]
CL14573Contig1	p3	(GAA)6	18	301	319	CGAAGAAGGAGTAACATCAGA	54.69	21	GACCCCAATATCCCAAAC	54.95	18	203	--	--	Cellular Component: intracellular membrane-bounded organelle (GO:0043231);; Cellular Component: cytoplasmic part (GO:0044444);;	--	Protein DEHYDRATION-INDUCED 19 homolog 4 OS=Arabidopsis thaliana GN=DI19-4 PE=1 SV=1	PREDICTED: protein DEHYDRATION-INDUCED 19-like [Cucumis sativus]
CL14653Contig1	p3	(TTC)5	15	301	316	ATCCATATGAAGCCAATCAG	55.09	20	CCCCTTTTGAACAGAAAAGT	55.94	20	151	[G]	Carbohydrate transport and metabolism	Molecular Function: ribulose-phosphate 3-epimerase activity (GO:0004750);; Cellular Component: cytoplasm (GO:0005737);; Cellular Component: cytosol (GO:0005829);; Cellular Component: plasma membrane (GO:0005886);; Biological Process: pentose-phosphate shunt (GO:0006098);; Molecular Function: ferrous iron binding (GO:0008198);; Biological Process: pentose-phosphate shunt, non-oxidative branch (GO:…	K01783|1e-141|pop:POPTR_815572|ribulose-phosphate 3-epimerase (EC:5.1.3.1)	Ribulose-phosphate 3-epimerase, cytoplasmic isoform OS=Oryza sativa subsp. japonica GN=Os09g0505700 PE=1 SV=1	PREDICTED: ribulose-phosphate 3-epimerase, cytoplasmic isoform-like [Cucumis sativus]
CL14689Contig1	p3	(ACC)5	15	301	316	GCAACCTTCTTAGAAATAGGC	55.08	21	TGTTTGTCGGTCTTCTCTTT	54.99	20	151	[V]	Defense mechanisms	Molecular Function: nucleotide binding (GO:0000166);; Biological Process: amino acid transmembrane transport (GO:0003333);; Molecular Function: ATP binding (GO:0005524);; Molecular Function: phospholipid transporter activity (GO:0005548);; Cellular Component: lysosome (GO:0005764);; Cellular Component: endosome (GO:0005768);; Cellular Component: vacuolar membrane (GO:0005774);; Cellular Component…	--	ABC transporter A family member 1 OS=Arabidopsis thaliana GN=ABCA1 PE=2 SV=2	ABC transporter family, cholesterol/phospholipid flippase isoform 2 [Theobroma cacao]
CL14739Contig1	p2	(TC)6	12	301	313	AGAGGTTTAGGGTTTTGTCAC	54.98	21	CCCTCTTAACAGGATTGAAGT	55.07	21	186	--	--	Cellular Component: mitochondrial intermembrane space (GO:0005758);; Biological Process: copper ion transport (GO:0006825);; Molecular Function: copper chaperone activity (GO:0016531);;	--	--	PREDICTED: uncharacterized protein LOC101222658 [Cucumis sativus]
CL244Contig1	p2	(TC)7	14	134	148	GGTCGTCACACTTTGTTTAGT	54.37	21	GGGAAGTAGAGTGAAAATGGA	55.88	21	157	[R]	General function prediction only	Cellular Component: chromatin (GO:0000785);; Cellular Component: nucleus (GO:0005634);; Cellular Component: cytoplasm (GO:0005737);; Cellular Component: plasma membrane (GO:0005886);; Biological Process: DNA-dependent DNA replication (GO:0006261);; Biological Process: DNA methylation (GO:0006306);; Biological Process: chromatin silencing (GO:0006342);; Biological Process: transcription from RNA p…	--	Histone-lysine N-methyltransferase ATX2 OS=Arabidopsis thaliana GN=ATX2 PE=2 SV=1	PREDICTED: LOW QUALITY PROTEIN: histone-lysine N-methyltransferase ATX2-like [Cucumis sativus]
CL244Contig1	p2	(CT)9	18	279	297	AGAAGTAGGTCAGGGCTTTT	54.8	20	ATCTTCTCCTTCTTCTCCATC	54.15	21	127	[R]	General function prediction only	Cellular Component: chromatin (GO:0000785);; Cellular Component: nucleus (GO:0005634);; Cellular Component: cytoplasm (GO:0005737);; Cellular Component: plasma membrane (GO:0005886);; Biological Process: DNA-dependent DNA replication (GO:0006261);; Biological Process: DNA methylation (GO:0006306);; Biological Process: chromatin silencing (GO:0006342);; Biological Process: transcription from RNA p…	--	Histone-lysine N-methyltransferase ATX2 OS=Arabidopsis thaliana GN=ATX2 PE=2 SV=1	PREDICTED: LOW QUALITY PROTEIN: histone-lysine N-methyltransferase ATX2-like [Cucumis sativus]
CL398Contig1	p3	(TTC)5	15	301	316	ATTTGTCCACAGAGTCATCAG	55.11	21	CAATCATGGAGGATGAAGTT	54.95	20	132	[J]	Translation, ribosomal structure and biogenesis	Biological Process: mitotic spindle elongation (GO:0000022);; Molecular Function: tRNA binding (GO:0000049);; Biological Process: formation of translation initiation ternary complex (GO:0001677);; Biological Process: in utero embryonic development (GO:0001701);; Biological Process: male germ cell proliferation (GO:0002176);; Molecular Function: translation initiation factor activity (GO:0003743);…	--	Eukaryotic translation initiation factor 2 subunit beta OS=Malus domestica PE=2 SV=2	PREDICTED: eukaryotic translation initiation factor 2 subunit beta-like isoform X1 [Cicer arietinum]
CL424Contig1	p2	(AC)6	12	301	313	GAGCATTGATGTGAACTATCC	54.7	21	GCCACCGAAAACCTATAAT	54.28	19	157	--	--	Molecular Function: transporter activity (GO:0005215);;	--	--	hypothetical protein VITISV_010947 [Vitis vinifera]
CL469Contig1	p2	(GA)10	20	301	321	TATCCAACAATGTGTGATGC	55.24	20	CTCTCTACAAGAACCCATTCC	55.47	21	151	[E]	Amino acid transport and metabolism	Molecular Function: 5-methyltetrahydropteroyltriglutamate-homocysteine S-methyltransferase activity (GO:0003871);; Molecular Function: copper ion binding (GO:0005507);; Cellular Component: vacuolar membrane (GO:0005774);; Cellular Component: peroxisome (GO:0005777);; Cellular Component: Golgi apparatus (GO:0005794);; Cellular Component: cytosol (GO:0005829);; Cellular Component: plasma membrane (…	K00549|0.0|rcu:RCOM_1321820|5-methyltetrahydropteroyltriglutamate--homocysteine methyltransferase, putative (EC:2.1.1.14)	5-methyltetrahydropteroyltriglutamate--homocysteine methyltransferase OS=Mesembryanthemum crystallinum GN=METE PE=2 SV=1	PREDICTED: 5-methyltetrahydropteroyltriglutamate--homocysteine methyltransferase-like [Fragaria vesca subsp. vesca]
CL509Contig1	p3	(GAT)5	15	253	268	CTTTAACCCTAGCCATTCTTC	54.94	21	GTCGGATAATTTTGACGAGA	55.3	20	141	[BK]	--	Molecular Function: p53 binding (GO:0002039);; Biological Process: platelet degranulation (GO:0002576);; Molecular Function: chromatin binding (GO:0003682);; Molecular Function: transcription coactivator activity (GO:0003713);; Molecular Function: transcription corepressor activity (GO:0003714);; Cellular Component: extracellular region (GO:0005576);; Cellular Component: cytosol (GO:0005829);; Ce…	--	Bromodomain and PHD finger-containing protein 3 OS=Homo sapiens GN=BRPF3 PE=1 SV=2	PREDICTED: uncharacterized protein LOC101217603 [Cucumis sativus]
CL687Contig1	p3	(AAG)5	15	79	94	AGCTTTTGGCATTCTCTGTA	55.29	20	GTAACGTAAACACGTCCTTCA	55.42	21	150	--	--	Molecular Function: DNA binding (GO:0003677);; Molecular Function: sequence-specific DNA binding transcription factor activity (GO:0003700);; Molecular Function: protein binding (GO:0005515);; Cellular Component: nucleus (GO:0005634);; Biological Process: regulation of transcription, DNA-dependent (GO:0006355);; Biological Process: response to auxin stimulus (GO:0009733);; Biological Process: aux…	--	Auxin response factor 9 OS=Arabidopsis thaliana GN=ARF9 PE=1 SV=1	PREDICTED: LOW QUALITY PROTEIN: auxin response factor 9-like, partial [Cucumis sativus]
CL703Contig1	p2	(CT)11	22	301	323	CGATTGCATCAATAGCATAC	54.33	20	AACTCAGAAACCGTATCGAA	54.96	20	167	--	--	Molecular Function: binding (GO:0005488);; Cellular Component: nucleus (GO:0005634);; Cellular Component: trans-Golgi network (GO:0005802);; Cellular Component: cytosol (GO:0005829);; Biological Process: protein targeting to vacuole (GO:0006623);; Biological Process: intracellular protein transport (GO:0006886);; Biological Process: Golgi to endosome transport (GO:0006895);; Biological Process: t…	K12402|0.0|vvi:100254067|hypothetical protein LOC100254067	AP-4 complex subunit mu OS=Dictyostelium discoideum GN=apm4 PE=2 SV=1	PREDICTED: AP-4 complex subunit mu-1-like [Cucumis sativus]
CL711Contig1	p3	(CTT)6	18	301	319	ATGACCTTACCGCCTTTAGT	55.52	20	GTCCATGGTTGAAAGAATGA	55.91	20	149	--	--	Molecular Function: protein binding (GO:0005515);; Cellular Component: cytoplasm (GO:0005737);; Cellular Component: cytoskeleton (GO:0005856);; Biological Process: RNA processing (GO:0006396);; Biological Process: transport (GO:0006810);; Biological Process: cytoskeleton organization (GO:0007010);; Biological Process: multicellular organismal process (GO:0032501);; Cellular Component: intracellul…	--	Formin-like protein 3 OS=Oryza sativa subsp. japonica GN=FH3 PE=2 SV=2	PREDICTED: uncharacterized protein LOC101216276 [Cucumis sativus]
CL754Contig1	p3	(AAG)6	18	301	319	TCGTGGTATTGATTCTACTGG	55.28	21	GTTGCTGTAACAATCTTCTCC	54.1	21	156	--	--	Biological Process: reproduction (GO:0000003);; Molecular Function: nucleic acid binding (GO:0003676);; Molecular Function: NAD+ ADP-ribosyltransferase activity (GO:0003950);; Cellular Component: nucleus (GO:0005634);; Cellular Component: nuclear envelope (GO:0005635);; Cellular Component: transcription factor complex (GO:0005667);; Cellular Component: polytene chromosome puff (GO:0005703);; Cell…	K10798|0.0|vvi:100257212|hypothetical protein LOC100257212	Poly [ADP-ribose] polymerase 2 OS=Arabidopsis thaliana GN=PARP2 PE=2 SV=1	PREDICTED: poly [ADP-ribose] polymerase 2-like [Cucumis sativus]
CL767Contig1	p2	(AG)6	12	301	313	GGTGAAAGATTGGGTTATGA	54.97	20	TCTCTAGTCACCCATTTGAGA	54.92	21	172	--	--	Molecular Function: DNA binding (GO:0003677);; Molecular Function: chromatin binding (GO:0003682);; Cellular Component: nucleus (GO:0005634);; Cellular Component: cytosol (GO:0005829);; Biological Process: gravitropism (GO:0009630);; Biological Process: embryo development ending in seed dormancy (GO:0009793);; Biological Process: flower development (GO:0009908);; Biological Process: response to o…	--	Transcription factor DIVARICATA OS=Antirrhinum majus GN=DIVARICATA PE=2 SV=1	transcription factor DIVARICATA-like [Cucumis sativus]
CL837Contig1	p2	(CT)7	14	301	315	TCTTTTGTCTCTTCTCCACAC	54.52	21	CATGGATTGTCCACTCTATACTC	55.37	23	149	[T]	Signal transduction mechanisms	Biological Process: developmental process involved in reproduction (GO:0003006);; Molecular Function: actin monomer binding (GO:0003785);; Molecular Function: ATP binding (GO:0005524);; Cellular Component: nucleus (GO:0005634);; Cellular Component: cytosol (GO:0005829);; Cellular Component: plasma membrane (GO:0005886);; Biological Process: N-terminal protein myristoylation (GO:0006499);; Biologi…	K00889|0.0|vvi:100250604|hypothetical protein LOC100250604	Phosphatidylinositol 4-phosphate 5-kinase 1 OS=Arabidopsis thaliana GN=PIP5K1 PE=1 SV=1	PREDICTED: phosphatidylinositol 4-phosphate 5-kinase 1-like [Cucumis sativus]
CL873Contig1	p3	(AGG)5	15	301	316	AATAGCCAGAGCCATAGAGTC	55.33	21	ATACCAACTCACCATTCCTCT	55.17	21	166	--	--	Biological Process: DNA damage checkpoint (GO:0000077);; Molecular Function: core promoter binding (GO:0001047);; Biological Process: epithelial cell development (GO:0002064);; Molecular Function: DNA binding (GO:0003677);; Molecular Function: sequence-specific DNA binding transcription factor activity (GO:0003700);; Cellular Component: nucleoplasm (GO:0005654);; Cellular Component: nucleolus (GO…	--	Transcription factor E2FC OS=Arabidopsis thaliana GN=E2FC PE=1 SV=1	PREDICTED: transcription factor E2FC-like [Cucumis sativus]
CL1035Contig1	p3	(CTT)5	15	301	316	CCTCTTCTTCTAATTCCCATC	54.65	21	CCTCTCTGCAATTGTATGTTC	54.97	21	149	--	--	Cellular Component: chloroplast (GO:0009507);;	--	--	PREDICTED: LOW QUALITY PROTEIN: uncharacterized protein LOC101205603 [Cucumis sativus]
CL1056Contig1	p3	(TTC)5	15	123	138	GGCGAGAGATAGAGAACTGAT	55.29	21	AGCACTGCCAATACTAAGAGA	54.49	21	160	--	--	Cellular Component: plasma membrane (GO:0005886);; Biological Process: cation transport (GO:0006812);; Biological Process: response to organic substance (GO:0010033);; Biological Process: regulation of meristem growth (GO:0010075);; Molecular Function: neutral amino acid transmembrane transporter activity (GO:0015175);; Cellular Component: membrane (GO:0016020);; Biological Process: cellular memb…	--	Lysine histidine transporter-like 8 OS=Arabidopsis thaliana GN=AATL1 PE=1 SV=1	amino acid transporter, putative [Ricinus communis]
CL1305Contig1	p2	(TC)6	12	160	172	GATAATACCCATTCCTCTTCC	54.31	21	TTGGATTTGAATGAGAGGAG	55.26	20	153	[RTKL]	--	Molecular Function: protein serine/threonine kinase activity (GO:0004674);; Molecular Function: ATP binding (GO:0005524);; Cellular Component: cell wall (GO:0005618);; Cellular Component: plasma membrane (GO:0005886);; Biological Process: cellular glucan metabolic process (GO:0006073);; Biological Process: chromatin silencing (GO:0006342);; Biological Process: protein phosphorylation (GO:0006468)…	--	Probable inactive receptor kinase At5g67200 OS=Arabidopsis thaliana GN=At5g67200 PE=1 SV=1	PREDICTED: probable inactive receptor kinase At5g67200-like [Cucumis sativus]
CL1349Contig1	p2	(GA)6	12	301	313	GAGAGAGAGATGGAGATGGAC	55.33	21	GTTTCTACCGTAGGATGAACA	54.41	21	136	[H]	Coenzyme transport and metabolism	Molecular Function: biotin synthase activity (GO:0004076);; Molecular Function: iron ion binding (GO:0005506);; Cellular Component: mitochondrion (GO:0005739);; Biological Process: acetyl-CoA metabolic process (GO:0006084);; Biological Process: microtubule nucleation (GO:0007020);; Molecular Function: zinc ion binding (GO:0008270);; Biological Process: biotin biosynthetic process (GO:0009102);; B…	K01012|0.0|rcu:RCOM_0574610|biotin synthase, putative (EC:2.8.1.6)	Biotin synthase OS=Arabidopsis thaliana GN=BIO2 PE=2 SV=1	PREDICTED: biotin synthase-like [Cucumis sativus]
CL1493Contig1	p2	(TA)6	12	301	313	AAAGGACTCTTAACGGAACAG	55.31	21	TCAAACTGGTTCTTCAGCTT	55.16	20	150	--	--	Molecular Function: sulfotransferase activity (GO:0008146);;	--	--	PREDICTED: uncharacterized LOC101217742 [Cucumis sativus]
CL1599Contig1	p2	(CT)9	18	92	110	CACATTTCCTCATCTCCTACA	55.23	21	CTCTCTGCTTTTCCTTCACTT	55.58	21	162	[O]	Posttranslational modification, protein turnover, chaperones	Molecular Function: endopeptidase activity (GO:0004175);; Molecular Function: ubiquitin-protein ligase activity (GO:0004842);; Molecular Function: protein binding (GO:0005515);; Molecular Function: ATP binding (GO:0005524);; Cellular Component: extracellular region (GO:0005576);; Cellular Component: endoplasmic reticulum (GO:0005783);; Biological Process: postreplication repair (GO:0006301);; Bio…	K10579|1e-121|rcu:RCOM_0553170|ubiquitin-conjugating enzyme m, putative (EC:6.3.2.19)	NEDD8-conjugating enzyme Ubc12 OS=Arabidopsis thaliana GN=RCE1 PE=1 SV=1	RUB1 conjugating enzyme 1 isoform 1 [Theobroma cacao]
CL1691Contig1	p3	(CGG)5	15	36	51	CCTCTTCATTTCTGCATTGT	55.37	20	ATGAATAGAACCGGAGAAGAG	55.15	21	148	[G]	Carbohydrate transport and metabolism	Molecular Function: beta-galactosidase activity (GO:0004565);; Cellular Component: extracellular region (GO:0005576);; Cellular Component: vacuolar membrane (GO:0005774);; Biological Process: carbohydrate metabolic process (GO:0005975);; Biological Process: polyamine catabolic process (GO:0006598);; Cellular Component: plant-type cell wall (GO:0009505);; Cellular Component: plasmodesma (GO:000950…	--	Beta-galactosidase 16 OS=Arabidopsis thaliana GN=BGAL16 PE=2 SV=2	PREDICTED: beta-galactosidase 16-like [Cucumis sativus]
CL1769Contig1	p3	(TCA)5	15	301	316	ACATTTGATGGCTACATGGT	55.36	20	AGGAAACATTCATCTCACCTC	55.71	21	150	[R]	General function prediction only	Molecular Function: ubiquitin-protein ligase activity (GO:0004842);; Molecular Function: protein binding (GO:0005515);; Cellular Component: cytoplasm (GO:0005737);; Biological Process: protein methylation (GO:0006479);; Molecular Function: kinase activity (GO:0016301);; Biological Process: protein ubiquitination (GO:0016567);; Molecular Function: histone-lysine N-methyltransferase activity (GO:00…	--	Putative E3 ubiquitin-protein ligase XBAT31 OS=Arabidopsis thaliana GN=XBAT31 PE=2 SV=1	PREDICTED: putative E3 ubiquitin-protein ligase XBAT31-like [Cucumis sativus]
CL1830Contig1	p3	(GAT)5	15	301	316	GCGATGATGAGGTTGATATT	55.07	20	CTGATCCCACTTCCTTAAAGT	55.07	21	152	--	--	Molecular Function: DNA binding (GO:0003677);; Molecular Function: sequence-specific DNA binding transcription factor activity (GO:0003700);; Molecular Function: protein binding (GO:0005515);; Biological Process: response to water deprivation (GO:0009414);; Biological Process: response to gibberellin stimulus (GO:0009739);; Biological Process: positive regulation of transcription, DNA-dependent (…	--	Transcription factor HB29 OS=Arabidopsis thaliana GN=HB29 PE=1 SV=1	PREDICTED: transcription factor HB29-like [Cucumis sativus]
CL1878Contig1	p3	(ACG)5	15	301	316	CCTGCTAAAAAGCAACAGAGT	56.51	21	GTACTTGTGGCACATCAGTTT	55.24	21	166	[L]	Replication, recombination and repair	Molecular Function: nucleotide binding (GO:0000166);; Molecular Function: rDNA binding (GO:0000182);; Biological Process: microtubule cytoskeleton organization (GO:0000226);; Cellular Component: nuclear chromosome (GO:0000228);; Molecular Function: four-way junction DNA binding (GO:0000400);; Molecular Function: satellite DNA binding (GO:0003696);; Molecular Function: mRNA binding (GO:0003729);; …	K03164|0.0|vvi:100253371|hypothetical protein LOC100253371	DNA topoisomerase 2 OS=Pisum sativum GN=TOP2 PE=2 SV=1	PREDICTED: DNA topoisomerase 2-like [Cucumis sativus]
CL2030Contig1	p3	(GGA)5	15	298	313	AATGGATTGTAGGGTTTGTG	54.92	20	CCAAGAAATCACTCACCATT	55.03	20	149	[D]	Cell cycle control, cell division, chromosome partitioning	Biological Process: maltose metabolic process (GO:0000023);; Biological Process: polysaccharide catabolic process (GO:0000272);; Biological Process: barrier septum assembly (GO:0000917);; Molecular Function: GTPase activity (GO:0003924);; Molecular Function: structural molecule activity (GO:0005198);; Molecular Function: GTP binding (GO:0005525);; Cellular Component: microtubule (GO:0005874);; Bi…	K03531|0.0|vvi:100243513|hypothetical protein LOC100243513	Cell division protein FtsZ homolog 1, chloroplastic OS=Arabidopsis thaliana GN=FTSZ1 PE=1 SV=2	PREDICTED: cell division protein FtsZ homolog 1, chloroplastic-like [Cucumis sativus]
CL2172Contig1	p3	(TCA)5	15	258	273	CACTCGCACACTTTCACATA	55.77	20	TAGGTGTTTGGGTGATACAAG	55.19	21	159	[P]	Inorganic ion transport and metabolism	Cellular Component: nucleus (GO:0005634);; Biological Process: phosphate ion transport (GO:0006817);; Biological Process: galactolipid biosynthetic process (GO:0019375);; Biological Process: negative regulation of transcription, DNA-dependent (GO:0045892);; Biological Process: cellular response to cold (GO:0070417);; Biological Process: positive regulation of cellular response to phosphate starva…	--	SPX domain-containing protein 2 OS=Arabidopsis thaliana GN=SPX2 PE=2 SV=1	PREDICTED: SPX domain-containing protein 1-like [Cucumis sativus]
CL2296Contig1	p3	(GTT)5	15	301	316	CTGATGATGACACAACAAGTG	54.93	21	AAGAAATACGGTCCTGGTTAC	54.96	21	126	[T]	Signal transduction mechanisms	Molecular Function: protein binding (GO:0005515);; Biological Process: regulation of transcription, DNA-dependent (GO:0006355);; Biological Process: cell cycle (GO:0007049);; Biological Process: cell surface receptor signaling pathway (GO:0007166);; Biological Process: multicellular organismal development (GO:0007275);; Biological Process: response to hormone stimulus (GO:0009725);; Biological Pr…	--	Uncharacterized WD repeat-containing protein alr3466 OS=Nostoc sp. (strain PCC 7120 / UTEX 2576) GN=alr3466 PE=4 SV=1	PREDICTED: myosin heavy chain kinase B-like [Cucumis sativus]
CL2336Contig1	p2	(AG)7	14	301	315	TGTACTTCGGGTGTTACCTTA	54.96	21	GTGGCCTATTAAAATGGGTA	54.34	20	151	[OU]	--	Molecular Function: protein disulfide isomerase activity (GO:0003756);; Cellular Component: nucleus (GO:0005634);; Cellular Component: endoplasmic reticulum membrane (GO:0005789);; Cellular Component: Golgi apparatus (GO:0005794);; Biological Process: protein folding (GO:0006457);; Biological Process: ER-nucleus signaling pathway (GO:0006984);; Cellular Component: plastid (GO:0009536);; Cellular …	--	Endoplasmic oxidoreductin-1 OS=Arabidopsis thaliana GN=AERO1 PE=1 SV=1	PREDICTED: endoplasmic oxidoreductin-1-like [Cucumis sativus]
CL2353Contig1	p3	(AGA)5	15	301	316	AAGACTAAGACCAGGAATTGG	55.07	21	AGGACCCAGTATTTTTAGACG	55.12	21	155	[RTKL]	--	Biological Process: respiratory burst involved in defense response (GO:0002679);; Molecular Function: protein kinase activity (GO:0004672);; Molecular Function: binding (GO:0005488);; Cellular Component: plasma membrane (GO:0005886);; Biological Process: ion transport (GO:0006811);; Biological Process: ER-nucleus signaling pathway (GO:0006984);; Biological Process: toxin catabolic process (GO:000…	--	Probable serine/threonine-protein kinase At1g18390 OS=Arabidopsis thaliana GN=At1g18390 PE=1 SV=2	PREDICTED: probable serine/threonine-protein kinase At1g18390-like [Cucumis sativus]
CL2381Contig1	p3	(GGA)5	15	301	316	ATGTCGGTCTTCCATTACTGT	56.11	21	TTGTCGTTGACAAGATCAGA	55.15	20	148	--	--	--	--	Probable serine/threonine-protein kinase DDB_G0278665 OS=Dictyostelium discoideum GN=DDB_G0278665 PE=3 SV=1	VQ motif-containing protein [Theobroma cacao]
CL2500Contig1	p3	(AGC)5	15	301	316	CATTCTGTAAATCTCCAGTGC	54.97	21	GGTGGATAATGCGTTTTTAC	54.78	20	149	--	--	Molecular Function: DNA binding (GO:0003677);; Molecular Function: sequence-specific DNA binding transcription factor activity (GO:0003700);; Molecular Function: protein binding (GO:0005515);; Cellular Component: nucleus (GO:0005634);; Biological Process: DNA repair (GO:0006281);; Biological Process: circadian rhythm (GO:0007623);; Molecular Function: zinc ion binding (GO:0008270);; Biological Pr…	--	Zinc finger protein CONSTANS-LIKE 1 OS=Arabidopsis thaliana GN=COL1 PE=1 SV=1	PREDICTED: uncharacterized protein LOC101215766 [Cucumis sativus]
CL2538Contig1	p2	(TC)6	12	191	203	CCTCTTCAACCAAAAGAAGA	54.64	20	GTCCTGGAAAAAGAGAAGAAG	54.92	21	155	[I]	Lipid transport and metabolism	Cellular Component: nucleus (GO:0005634);; Cellular Component: endoplasmic reticulum membrane (GO:0005789);; Biological Process: unsaturated fatty acid biosynthetic process (GO:0006636);; Biological Process: response to cold (GO:0009409);; Cellular Component: chloroplast envelope (GO:0009941);; Cellular Component: integral to membrane (GO:0016021);; Molecular Function: oxidoreductase activity, ac…	K10256|0.0|rcu:RCOM_0503360|omega-6 desaturase, endoplasmic reticulum (EC:1.14.99.33)	Omega-6 fatty acid desaturase, endoplasmic reticulum isozyme 2 OS=Glycine max GN=FAD2-2 PE=2 SV=1	PREDICTED: omega-6 fatty acid desaturase, endoplasmic reticulum isozyme 2-like [Cucumis sativus]
CL2883Contig1	p2	(AT)6	12	301	313	CATTCTTTCATTGTGGGTCT	55.03	20	TGGTCTCAGAAAACCATCTT	54.73	20	143	[C]	Energy production and conversion	Molecular Function: NADH dehydrogenase activity (GO:0003954);; Molecular Function: NADPH dehydrogenase activity (GO:0003959);; Cellular Component: mitochondrial intermembrane space (GO:0005758);; Cellular Component: mitochondrial matrix (GO:0005759);; Cellular Component: peroxisome (GO:0005777);; Molecular Function: NADH dehydrogenase (ubiquinone) activity (GO:0008137);; Cellular Component: plast…	K03885|0.0|rcu:RCOM_1062920|Rotenone-insensitive NADH-ubiquinone oxidoreductase, mitochondrial precursor, putative (EC:1.6.5.3)	Internal alternative NAD(P)H-ubiquinone oxidoreductase A2, mitochondrial OS=Arabidopsis thaliana GN=NDA2 PE=1 SV=1	PREDICTED: alternative NAD(P)H dehydrogenase 1, mitochondrial-like [Cucumis sativus]
CL2918Contig1	p3	(TCC)5	15	301	316	GACCCAATTCCTTAAAATCC	55.15	20	TTGATGTAAACGGAGGAATC	55.13	20	203	--	--	Molecular Function: protein binding (GO:0005515);; Biological Process: cellular protein modification process (GO:0006464);; Biological Process: organelle organization (GO:0006996);; Biological Process: pattern specification process (GO:0007389);; Cellular Component: plant-type cell wall (GO:0009505);; Cellular Component: plasmodesma (GO:0009506);; Biological Process: embryo development (GO:000979…	--	Leucine-rich repeat extensin-like protein 6 OS=Arabidopsis thaliana GN=LRX6 PE=2 SV=1	PREDICTED: leucine-rich repeat extensin-like protein 4-like [Cucumis sativus]
CL2947Contig1	p3	(GAT)5	15	301	316	TCGAGATGAGTTTTCGAGTAG	54.85	21	GCCGTCTTCAGCTATATCTTC	55.88	21	143	[O]	Posttranslational modification, protein turnover, chaperones	Cellular Component: ubiquitin ligase complex (GO:0000151);; Biological Process: protein polyubiquitination (GO:0000209);; Molecular Function: DNA binding (GO:0003677);; Molecular Function: ubiquitin-protein ligase activity (GO:0004842);; Molecular Function: protein binding (GO:0005515);; Cellular Component: nucleus (GO:0005634);; Cellular Component: nucleolus (GO:0005730);; Cellular Component: cy…	K10592|0.0|rcu:RCOM_0522490|E3 ubiquitin protein ligase upl2, putative	E3 ubiquitin-protein ligase UPL1 OS=Arabidopsis thaliana GN=UPL1 PE=1 SV=3	PREDICTED: E3 ubiquitin-protein ligase UPL1-like [Cucumis sativus]
CL3005Contig1	p3	(CAC)5	15	201	216	AATCTTAACCCTAACGTCGTC	55.11	21	GATTGATGGATTTGATGAGG	55.3	20	152	[F]	Nucleotide transport and metabolism	Biological Process: nuclear-transcribed mRNA catabolic process (GO:0000956);; Molecular Function: binding (GO:0005488);; Cellular Component: cytoplasm (GO:0005737);; Biological Process: phosphate-containing compound metabolic process (GO:0006796);; Biological Process: cellular amino acid biosynthetic process (GO:0008652);; Molecular Function: uridylate kinase activity (GO:0009041);; Biological Pr…	--	Uridylate kinase OS=Prochlorococcus marinus (strain SARG / CCMP1375 / SS120) GN=pyrH PE=3 SV=1	PREDICTED: uncharacterized protein LOC101222460 [Cucumis sativus]
CL3055Contig1	p2	(AG)6	12	301	313	GATGGCTGAGAAAGAGAAGAT	55.25	21	CCTCCATTTATGAAGCTTTG	55.07	20	155	[R]	General function prediction only	Molecular Function: magnesium ion binding (GO:0000287);; Molecular Function: GTPase activity (GO:0003924);; Molecular Function: GTP binding (GO:0005525);; Biological Process: GTP catabolic process (GO:0006184);;	--	GTPase obg OS=Desulfotomaculum reducens (strain MI-1) GN=obg PE=3 SV=1	PREDICTED: GTPase obg-like [Cucumis sativus]
CL3081Contig1	p3	(GAA)8	24	301	325	TTCCTTGAAAGATCTCGTTG	55.51	20	ACTTCTCGTAACGATTCCTCT	54.81	21	148	--	--	--	--	--	PREDICTED: uncharacterized protein LOC101219576 [Cucumis sativus]
CL3190Contig1	p3	(TGC)5	15	301	316	TATCGAGTCATTTGCAGACA	55.29	20	CATGTGTGCTGTACCTTCAC	54.94	20	145	--	--	Molecular Function: nucleotide binding (GO:0000166);; Molecular Function: protein binding (GO:0005515);; Cellular Component: nucleus (GO:0005634);; Cellular Component: vacuole (GO:0005773);; Cellular Component: plasma membrane (GO:0005886);; Biological Process: protein localization (GO:0008104);; Biological Process: metabolic process (GO:0008152);; Cellular Component: endomembrane system (GO:0012…	--	BEACH domain-containing protein lvsC OS=Dictyostelium discoideum GN=lvsC PE=4 SV=2	PREDICTED: uncharacterized protein LOC101215970 [Cucumis sativus]
CL3385Contig1	p3	(AGA)5	15	301	316	ATACAGATCTACCCCTTTTGG	54.89	21	TCAACAACAACAACCTACTCC	55.22	21	167	--	--	--	--	--	PREDICTED: uncharacterized protein LOC101230237 [Cucumis sativus]
CL3540Contig1	p3	(CTT)5	15	301	316	AGATTGTTACGATGGCTCTG	55.41	20	TTCTATCTCCTAAAGCCACCT	54.92	21	157	--	--	--	--	F-box/kelch-repeat protein At3g06240 OS=Arabidopsis thaliana GN=At3g06240 PE=2 SV=1	PREDICTED: F-box protein CPR30-like [Cucumis sativus]
CL3704Contig1	p4	(ATAC)5	20	26	46	GACAAAAGACTCGAGAGGAAT	55.17	21	TCCACTTCAACAACACTCAA	55.06	20	169	[I]	Lipid transport and metabolism	Cellular Component: nucleus (GO:0005634);; Biological Process: sterol biosynthetic process (GO:0016126);; Biological Process: pentacyclic triterpenoid biosynthetic process (GO:0019745);; Molecular Function: lupeol synthase activity (GO:0042299);; Molecular Function: beta-amyrin synthase activity (GO:0042300);; Biological Process: cuticle development (GO:0042335);; Molecular Function: alpha-amyrin…	--	Isomultiflorenol synthase OS=Luffa cylindrica GN=IMS1 PE=1 SV=1	RecName: Full=Isomultiflorenol synthase; Short=LcIMS1
CL3828Contig1	p2	(AG)6	12	301	313	CTGATCTATTGAAGCAAGCTG	55.47	21	ATTGAACTAGGCGTTGACTTC	56.13	21	163	--	--	Molecular Function: calmodulin binding (GO:0005516);; Cellular Component: nucleus (GO:0005634);; Biological Process: cellular process (GO:0009987);; Cellular Component: cell part (GO:0044464);;	--	Protein IQ-DOMAIN 1 OS=Arabidopsis thaliana GN=IQD1 PE=1 SV=1	PREDICTED: uncharacterized protein LOC101210019 [Cucumis sativus]
CL3973Contig1	p2	(TC)6	12	284	296	GCTCCTGTTATCATTCAACTG	54.97	21	CTTTCTTGCTGTATCATGGTC	54.97	21	147	[RTKL]	--	Molecular Function: calmodulin-dependent protein kinase activity (GO:0004683);; Molecular Function: calcium ion binding (GO:0005509);; Molecular Function: calmodulin binding (GO:0005516);; Molecular Function: ATP binding (GO:0005524);; Cellular Component: vacuole (GO:0005773);; Cellular Component: cytosol (GO:0005829);; Cellular Component: plasma membrane (GO:0005886);; Biological Process: regula…	--	Calcium and calcium/calmodulin-dependent serine/threonine-protein kinase OS=Lotus japonicus GN=CCAMK PE=1 SV=1	PREDICTED: calcium and calcium/calmodulin-dependent serine/threonine-protein kinase-like [Cucumis sativus]
CL4428Contig1	p2	(TC)6	12	166	178	ATCGTCTTCTTCCTCTTCATC	55.09	21	ATCGGATTCAGTGATGGTTA	55.42	20	153	[P]	Inorganic ion transport and metabolism	Biological Process: potassium ion transport (GO:0006813);; Biological Process: sodium ion transport (GO:0006814);; Biological Process: lithium ion transport (GO:0010351);; Molecular Function: potassium:hydrogen antiporter activity (GO:0015386);; Cellular Component: membrane (GO:0016020);; Cellular Component: integral to membrane (GO:0016021);; Biological Process: potassium ion transmembrane trans…	--	K(+) efflux antiporter 4 OS=Arabidopsis thaliana GN=KEA4 PE=2 SV=2	PREDICTED: K(+) efflux antiporter 4-like [Cucumis sativus]
CL4831Contig1	p3	(GCT)6	18	290	308	GCTTTAGCTGAACGTCTTCTT	55.76	21	GAAGGCTCTACTTGAGAATCC	54.86	21	188	[H]	Coenzyme transport and metabolism	Molecular Function: ATP binding (GO:0005524);; Biological Process: phosphate-containing compound metabolic process (GO:0006796);; Biological Process: biosynthetic process (GO:0009058);; Cellular Component: chloroplast (GO:0009507);; Molecular Function: kinase activity (GO:0016301);;	--	Putative uridine kinase C227.14 OS=Schizosaccharomyces pombe (strain 972 / ATCC 24843) GN=SPAC227.14 PE=3 SV=1	PREDICTED: putative uridine kinase C227.14-like [Cucumis sativus]
CL4845Contig1	p3	(GAA)6	18	301	319	TTCCTGGTTTGAATAGGTTG	55.23	20	CTTTCTGAGCCCTAGGTTTT	55.37	20	152	--	--	Molecular Function: DNA binding (GO:0003677);; Molecular Function: chromatin binding (GO:0003682);; Molecular Function: sequence-specific DNA binding transcription factor activity (GO:0003700);; Molecular Function: binding (GO:0005488);; Cellular Component: nucleus (GO:0005634);; Biological Process: DNA repair (GO:0006281);; Biological Process: chromatin remodeling (GO:0006338);; Biological Proce…	K11324|0.0|vvi:100265771|hypothetical protein LOC100265771	DNA methyltransferase 1-associated protein 1 OS=Homo sapiens GN=DMAP1 PE=1 SV=1	PREDICTED: DNA methyltransferase 1-associated protein 1-like [Cucumis sativus]
CL5460Contig1	p2	(GA)7	14	301	315	GGAACTAAAGACCATCTAAAGC	54.17	22	TACCGACATACTTCTGGGATT	56.19	21	159	--	--	--	--	--	PREDICTED: uncharacterized protein LOC101205113 [Cucumis sativus]
CL6383Contig1	p3	(GAA)5	15	301	316	GAGTGTGAAAGCAATTCCTAC	54.1	21	TCTAGAGCTCAATTTCTCAGG	54.08	21	148	--	--	Cellular Component: extracellular region (GO:0005576);; Cellular Component: cell wall (GO:0005618);; Biological Process: polyamine catabolic process (GO:0006598);; Biological Process: defense response (GO:0006952);; Cellular Component: chloroplast (GO:0009507);; Biological Process: systemic acquired resistance (GO:0009627);; Biological Process: lignan biosynthetic process (GO:0009807);; Biologica…	--	Dirigent protein 23 OS=Arabidopsis thaliana GN=DIR23 PE=2 SV=1	disease resistance response protein [Cucumis melo subsp. melo]
CL6764Contig1	p2	(AT)6	12	103	115	GCCTCTCTACATTTTGGATCT	55.14	21	CCAATTCGTGATTGTGTAAC	53.91	20	158	--	--	--	--	--	PREDICTED: uncharacterized protein LOC101206551 [Cucumis sativus]
CL7386Contig1	p3	(GAA)5	15	301	316	ATTGTTCCCTTAGAGGAAGG	54.98	20	CCCGTTGTTTTCTACTCTCTT	55.31	21	151	--	--	Biological Process: microtubule cytoskeleton organization (GO:0000226);; Biological Process: double-strand break repair via homologous recombination (GO:0000724);; Biological Process: cytokinesis by cell plate formation (GO:0000911);; Molecular Function: protein binding (GO:0005515);; Biological Process: nucleobase-containing compound metabolic process (GO:0006139);; Biological Process: DNA methy…	--	Trichohyalin OS=Oryctolagus cuniculus GN=TCHH PE=2 SV=1	PREDICTED: uncharacterized protein LOC101221010 [Cucumis sativus]
CL8444Contig1	p2	(AG)6	12	301	313	CTCAGTTTCTCAACTCGAAGA	54.88	21	ATTCCGAATCTCTCACAGAA	54.81	20	148	--	--	Molecular Function: aspartic-type endopeptidase activity (GO:0004190);; Cellular Component: extracellular region (GO:0005576);; Cellular Component: endoplasmic reticulum (GO:0005783);; Biological Process: proteolysis (GO:0006508);; Biological Process: defense response (GO:0006952);; Biological Process: response to water deprivation (GO:0009414);; Cellular Component: plant-type cell wall (GO:00095…	--	Protein ASPARTIC PROTEASE IN GUARD CELL 1 OS=Arabidopsis thaliana GN=ASPG1 PE=1 SV=1	PREDICTED: protein ASPARTIC PROTEASE IN GUARD CELL 1-like [Cucumis sativus]
CL8556Contig1	p2	(TC)9	18	301	319	CCAAAGTTGCATTCTTTCTC	55.09	20	CCGTTTCTCTGCTTTCTTT	54.82	19	134	--	--	Molecular Function: aspartic-type endopeptidase activity (GO:0004190);; Molecular Function: protein binding (GO:0005515);; Cellular Component: endosome (GO:0005768);; Cellular Component: Golgi apparatus (GO:0005794);; Cellular Component: trans-Golgi network (GO:0005802);; Cellular Component: plasma membrane (GO:0005886);; Biological Process: multicellular organismal development (GO:0007275);; Cel…	K09598|0.0|pop:POPTR_734196|hypothetical protein	Signal peptide peptidase-like 1 OS=Arabidopsis thaliana GN=SPPL1 PE=2 SV=1	Signal peptide peptidase-like 1 isoform 1 [Theobroma cacao]
CL8635Contig1	p3	(TTC)5	15	301	316	ATCTTCTTCTTACTCCCACCA	55.47	21	CCGAAGATCTCAAACATCAA	56.25	20	149	[R]	General function prediction only	Molecular Function: DNA binding (GO:0003677);; Molecular Function: DNA-directed DNA polymerase activity (GO:0003887);; Molecular Function: nuclease activity (GO:0004518);; Cellular Component: cytoplasm (GO:0005737);; Biological Process: DNA replication (GO:0006260);; Molecular Function: transferase activity (GO:0016740);;	K07053|0.0|vvi:100245053|hypothetical protein LOC100245053	Protein TrpH OS=Haemophilus influenzae (strain ATCC 51907 / DSM 11121 / KW20 / Rd) GN=trpH PE=3 SV=1	PREDICTED: protein TrpH-like [Cucumis sativus]
[truncated: 1,933 more rows]

## Sheet: Sheet3
Table S3: Characterization of 360 primer pairs amplification in 6 G.pentaphyllum individuals
Primer name	Base on sequence ID	Repeat motif	Forward primer(5'-3')	Tm(℃)	Reverse primer(5'-3')	Tm(℃)	Expective size(bp)
G-EST-SSR1	CL9596Contig1	(AGC)5	AGCAGCAGCAGCAGC	54.96	ATGGATAATGAGCCTGACTG	55.15	148
G-EST-SSR2	CL9780Contig1	(AG)6	TGTCTCTGTGATTTCTTGAGAG	54.72	GGAAGTGATTTTACGAGCAA	55.54	156
G-EST-SSR3	CL9793Contig1	(ATG)6	CGAAAGAGAGAATTCCAAGAG	55.92	TCGTTAACTTTACCTGAGAGG	53.93	160
G-EST-SSR4	CL9883Contig1	(AGA)5	CCTTAACAGCTGAAGGAAGAT	55.38	AGCATTTCTCTTTCTCTCTCC	54.57	117
[truncated: 356 more rows]
